# Supplementary material
Source: publisher figshare collection journal article supplement (https://frontiersin.figshare.com/ndownloader/files/13754624)
Supplement: Supplementary file [file 13754624]

**Supplementary Table 1. Gene specific primers.**

|                                                 |                                                        |
|-------------------------------------------------|--------------------------------------------------------|
| <b>quantitative PCR – 5'-3' 157 bp amplicon</b> |                                                        |
| IR qPCR Forward                                 | AGCTCCCAGATTGTCTACGG                                   |
| IR qPCR Reverse                                 | CCGGGTCGAATCAACTAGG                                    |
| <b>dsRNA – 5'-3' 475 bp amplicon</b>            |                                                        |
| IR Forward                                      | GAGATGATTGTTTATTGGGTGC                                 |
| T7-IR Forward                                   | <b>TAATACGACTCACTATAGGGAGAG</b> AGATGATTGTTTATTGGGTGC* |
| IR Reverse                                      | GGGTGCAATTTGATCCCACT                                   |
| T7-IR Reverse                                   | <b>TAATACGACTCACTATAGGGAGAG</b> GGGTGCAATTTGATCCCACT*  |

\* **TAATACGACTCACTATAGGGAGA** = T7 RNA polymerase promoter

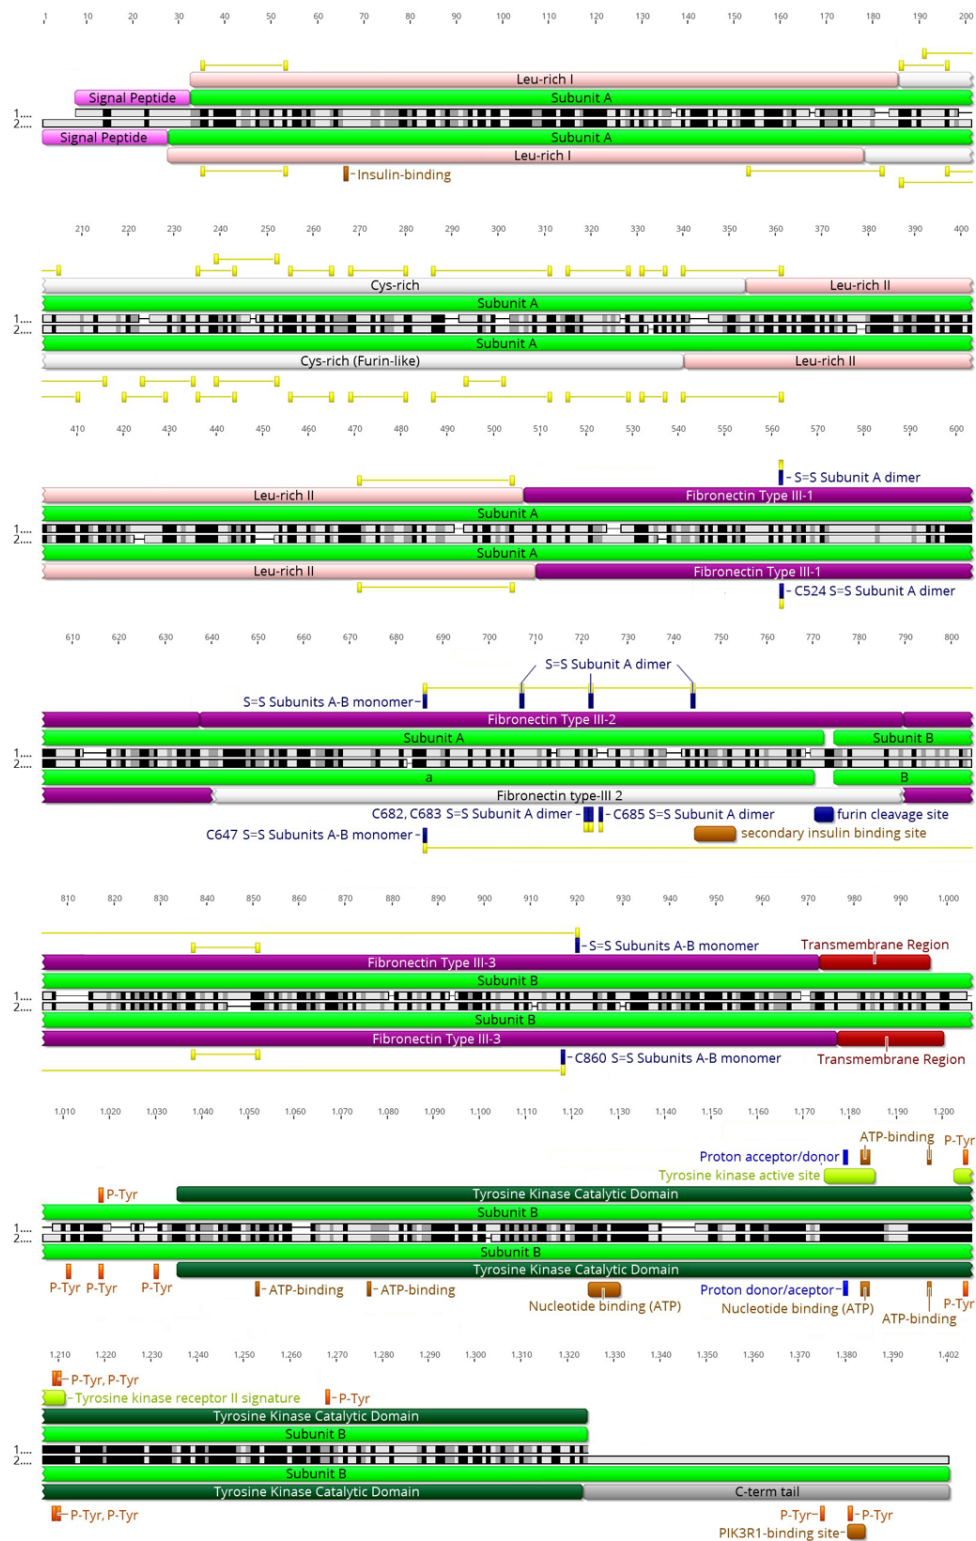

**Supplementary Figure 1. Graphic alignment highlighting the structural similarities between Rhopr-IR and human IR.** The IR monomers were aligned, and subunits A and B are highlighted by green and purple boxes, respectively. Signal peptides are highlighted in bright pink, followed by Leu-rich domains highlighted in pale pink and Cys-rich domains in light grey. Disulfide bonds are identified by yellow boxes over Cys residues, connected by yellow lines when the bonds are formed within the monomer. Fibronectin Type-III domains are

indicated by purple and grey boxes. The Cys residues that form disulfide bonds involved in the dimerization of the receptor are indicated by yellow/dark blue boxes over said residues. The Cys residues that form the disulfide bonds between subunits A and B of each monomer, are indicated by yellow/dark blue boxes over the residues and connected by yellow lines. The transmembrane regions are highlighted by red boxes, and the Tyr kinase catalytic domain by dark green boxes. Tyr residues that are phosphorylated upon activation of the receptor are indicated with small orange boxes. ATP-binding sites between the active site and the receptor signature are indicated with brown boxes over the residues.

CLUSTAL multiple sequence alignment by MUSCLE (3.8)

```

Drosophila_melanogaster      -MFNMPRGVTKSKSKRGKIKMENDMAAAATTAKTACTLGHICVLCRQEMLLDTCCCRQ
Halyomorpha_halys           -----
Rhodnius_prolixus           -----
Cimex_lectularius_X1        MNGMRPRNSMEGGAWVGVGGGHGGPSLLAVHQCTLTPES-----
C._lectularius_X2           -----
Cryptotermes_secundus       -----
Miniopterus_natalensis      -----
Callithrix_jacchus          -----
Heterocephalus_glaber_X1    -----
Dasypus_novemcinctus        -----
Tupaia_chinensis_X2        -----
Homo_sapiens_X1             -----
Pongo_abelii_2              -----
Pan_troglodytes_X2          -----
Boleophthalmus_pectinirostris -----
Larimichthys_crocea_X2      -----
Larimichthys_crocea         -----
Lates_calcarifer            -----
Seriola_lalandi_dorsalis    -----
Seriola_dumerili            -----
Zootermopsis_nevadensis     -----
Parasteatoda_tepidariorum   -----
Onthophagus_nigriventris    -----DACSERKA-----
Nicrophorus_vespilloides    -----
Tribolium_castaneum         -----
Nilaparvata_lugens          -----
Blattella_germanica         -----
Nasonia_vitripennis_X1      -----MSNLHRSTMTTTTSGCIET-----
Microplitis_demolitor       -----MKSSVISKKEKDKKEIML-----
Neodiprion_lecontei         MGRRTVNNMRWREHQR---NENDDGSVATTTTKTANESSTSI-----
Athalia_rosae               -MMKNSRRLQRRNSKNCSTSSSTDDRVNGVGSVMTRNFNAIKKSNGINDDEDCCNNDVN
Orussus_abietinus           ---MKPCESIGSPVAVNWDACSAPNYDT-----PIKPADDGE-----
Dufourea_novaeangliae      ---MKSAAWCTRRLGSASSVDDSDASPEEVYTTTSVRCSNIAAATTRISCGVTAIVDAA
Megachile_rotundata_X1      -----
Melipona_quadrifasciata     -----
Apis_mellifera_X1           --MEPSTWCTRLGGGVATSAESTIAVTLAKLGATTSSRLSSDASAIIPQPD-----
Eufriesea_mexicana_1        --MESPTWCTRLGGSSAIESSSSSRLSIASNPNVNDRSSETDTTPC-----
Eufriesea_mexicana_2        -----
Bombus_terrestris           --MEPLTWCTRLGGSVAAESEESTIAVTLAKVAATTSSRLSTNANPNVNDCSSTTTWICET
Bombus_impatiens            --MEPLTWCTRLGGSVAAESEESTIAVTLAKVAATTSSRLSTNANPNVNDCSSTTTWICGT
Polistes_dominula_X1        ---MYFSRMRMRMEIHEELNRNSSSSNSSSSSSSSSSSSRKSTRSTTRISSTLDD
Cephus_cinctus_X1           ---MTLTDCSSLLTGNCLEYS-----
Dinoponera_quadriiceps_X2   MGKMKSAACTTRLAGTATFDEDE-PSAV--P-----SSSEARSNT-----
Harpegnathos_saltator_X1    MVKMKSAACTTRLRGATFDEDESRAVSPS-----PSPKIRSNT-----
Linepithema_humile_X2       -----
Linepithema_humile_X1       -----
Ooceraea_biroi              --MKSSAARYRRK-SRGATFDEDEPSTTT--PSSCSCSSSSEAHSTN-----
Camponotus_floridanus       --MKSPA--FACRKNRSATFDVDDEPYAS--A-----ASSSSSETLLVTR-----
Solenopsis_invicta          --MKSSAACYARR-FGGVTFDENESSIVA--P-----FLSEANSTT-----
Pogonomyrmex_barbatus_X1    --MKSSAACR---LCGATFDEDESSIAS--T-----SFPEADHAI-----
Vollenhovia_emeryi_X1       --MNFSGACHARR---LGSVDESSTVAA--L-----SSSEANFST-----
Wasmannia_auropunctata      --MKSSAACYTARRLRGATFDEDEVPSIVA--S-----SFSEANSTT-----
Cyphomyrmex_costatus        -----
Trachymyrmex_septentrionalis --MKSSAACYTSRGLRDAMFDEGERSVVA--S-----SFWEVDSTT-----
Atta_colombica               -----MISETKEAS-----
Trachymyrmex_cornetzi       --MKFSATCYTRR-LRGVTFDEDERSIVA--S-----SFSEVNSTT-----
Acromyrmex_echinator        --MKSSATCYTRR-LRGATFDEDEKQNIVA--T-----SFWEVNSTT-----
Atta_cephalotes             --MKSSATCYTRR-LRGATFDEDEKQNIVA--T-----SFWEVNSTT-----

Drosophila_melanogaster      AVEAVDSPASSEAYSSSNS-----SSCQASSEISAEVWFLSHDDIVLCRRPKFDEV
Halyomorpha_halys           -----
Rhodnius_prolixus           -----
Cimex_lectularius_X1        -----
C._lectularius_X2           -----
Cryptotermes_secundus       -----
Miniopterus_natalensis      -----
Callithrix_jacchus          -----

```

|                               |                                                              |
|-------------------------------|--------------------------------------------------------------|
| Heterocephalus_glaber_X1      | -----                                                        |
| Dasypus_novemcinctus          | -----                                                        |
| Tupaia_chinensis_X2           | -----                                                        |
| Homo_sapiens_X1               | -----                                                        |
| Pongo_abelii_2                | -----                                                        |
| Pan_troglodytes_X2            | -----                                                        |
| Boleophthalmus_pectinirostris | -----                                                        |
| Larimichthys_crocea_X2        | -----                                                        |
| Larimichthys_crocea           | -----                                                        |
| Lates_calcarifer              | -----                                                        |
| Seriola_lalandi_dorsalis      | -----                                                        |
| Seriola_dumerili              | -----                                                        |
| Zootermopsis_nevadensis       | -----                                                        |
| Parasteatoda_tepidariozum     | -----                                                        |
| Onthophagus_nigriiventris     | -----                                                        |
| Nicrophorus_vespilloides      | -----                                                        |
| Tribolium_castaneum           | -----                                                        |
| Nilaparvata_lugens            | -----                                                        |
| Blattella_germanica           | -----                                                        |
| Nasonia_vitripennis_X1        | -----SSCRC-----CCSCG-----RELS-----                           |
| Microplitis_demolitor         | -----GCPNCLVHL-----ELST-----                                 |
| Neodiprion_lectonetei         | -----LNSLC-----YSCRIC-----QADEAGRDKNENT-----                 |
| Athalia_rosae                 | TKVVTSSSTSASEDDVENFCDKGAKVFQCRNCSPGTALGEELDNEEYGRAIDGSSPLTGR |
| Orussus_abietinus             | -----NY-----SCSNCLALQ-----VKVTEDFVDS                         |
| Dufourea_novaeangliae         | TTGCAVTTNTSTTTCHCHCPSGRDTLECADPSHFLSSSSTMSASTGPNRTTT-----    |
| Megachile_rotundata_X1        | -----                                                        |
| Melipona_quadrifasciata       | -----                                                        |
| Apis_mellifera_X1             | -----PCPSSSPQH-----                                          |
| Eufriesea_mexicana_1          | ---LADTSADASSASCHCHCSSGCVATRSHSWSSRL-----                    |
| Eufriesea_mexicana_2          | -----                                                        |
| Bombus_terrestris             | TCRLTDTSEDANSVLRHCHC-----WSGSATPG                            |
| Bombus_impatiens              | TCRLTDTSEDANSVLRHCHC-----WSSSATPG                            |
| Polistes_dominula_X1          | QQSTTANFCCPSGGYCFCCC-----CCRCNNGVTMNNKECKMNNMEEHENKDDCIINN   |
| Cephus_cinctus_X1             | -----                                                        |
| Dinoponera_quadricaps_X2      | -----CHCHC-----P-WSRGAFE-----EALA-----                       |
| Harpegnathos_saltator_X1      | -----CHCHC-----P-WSRGAFE-----DALA-----                       |
| Linepithema_humile_X2         | -----                                                        |
| Linepithema_humile_X1         | -----                                                        |
| Ooceraea_biroi                | -----CHCHC-----PLSSRGVFE-----DVDGVPAAWT                      |
| Camponotus_floridanus         | -----RYCHC-----P-SICGAFE-----DTSNDASSQS                      |
| Solenopsis_invicta            | -----CHCHC-----P---CDAFE-----RDDGASSL---                     |
| Pogonomyrmex_barbatus_X1      | -----RHCHC-----LSSSSREFE-----KTDGASF-PS                      |
| Vollenhovia_emeryi_X1         | -----CHCHC-----PSSSCGAFE-----KDDGVSSFLPS                     |
| Wasmannia_auropunctata        | -----CHCQC-----PSSSCGAFE-----KDDGVSFPLPS                     |
| Cyphomyrmex_costatus          | -----                                                        |
| Trachymyrmex_septentrionalis  | -----CHCHC-----PSSSCGAFG-----KDDGVSFPPS                      |
| Atta_colombica                | -----CSLMH-----RLNCC-----TLLLP-                              |
| Trachymyrmex_cornetzi         | -----CHCHC-----PSSSCGAFE-----KDDGISFLPS                      |
| Acromyrmex_echinator          | -----CHYHY-----PSSSCGAFE-----KDDGVSFPLPS                     |
| Atta_cephalotes               | -----CHYHY-----PSSNCGAFE-----KDDGISFLPS                      |
| Drosophila_melanogaster       | ETTGKKRDVKCSGHQCSNECDDGSTKNNRQQRENFNIFSNCHNI-----            |
| Halyomorpha_halys             | -----                                                        |
| Rhodnius_prolixus             | -----                                                        |
| Cimex_lectularius_X1          | -----LLHLAQVRDRVAALR-----                                    |
| C.lectularius_X2              | -----                                                        |
| Cryptotermes_secundus         | -----                                                        |
| Miniopterus_natalensis        | -----MGTLGICEGENRLAEKPLPLPGESVGP-----                        |
| Callithrix_jacchus            | -----                                                        |
| Heterocephalus_glaber_X1      | -----                                                        |
| Dasypus_novemcinctus          | -----                                                        |
| Tupaia_chinensis_X2           | -----                                                        |
| Homo_sapiens_X1               | -----                                                        |
| Pongo_abelii_2                | -----                                                        |
| Pan_troglodytes_X2            | -----                                                        |
| Boleophthalmus_pectinirostris | -----                                                        |
| Larimichthys_crocea_X2        | -----                                                        |
| Larimichthys_crocea           | -----                                                        |
| Lates_calcarifer              | -----                                                        |
| Seriola_lalandi_dorsalis      | -----                                                        |

|                              |                                                         |
|------------------------------|---------------------------------------------------------|
| Seriola_dumerili             | -----                                                   |
| Zootermopsis_nevadensis      | -----                                                   |
| Parasteatoda_tepidarium      | -----MVVIVIFKGEAAMG-----                                |
| Onthophagus_nigriiventris    | -----GPLLCRISHPMASKSICG-----                            |
| Nicrophorus_vespilloides     | -----                                                   |
| Tribolium_castaneum          | -----                                                   |
| Nilaparvata_lugens           | -----MEDSACPGCSLRPTNVGRR-----                           |
| Blattella_germanica          | -----                                                   |
| Nasonia_vitripennis_X1       | -----AARLCPLCQRLQHDS-----KACGDE-----                    |
| Microplitis_demolitor        | -----FTDQCQLCDRLCNES-----KSVTFI IQK-----                |
| Neodiprion_lecontei          | VG-----YR-----CEICERLQGSVGDDVDLSTNEE-----               |
| Athalia_rosae                | LG-----HRQKPQQQCELCERLQGCESKDKSSVDGNERRGAGGGAGAGAGGGECC |
| Orussus_abietinus            | -----EFLQCDICKRLRNSA-----ENHEEGCNEV-----                |
| Dufourea_novaeangliae        | -----ISNSCELCERLRGRC-----                               |
| Megachile_rotundata_X1       | -----MTSCGTSNRVTDPTLS-----                              |
| Melipona_quadrifasciata      | -----                                                   |
| Apis_mellifera_X1            | -----HDHGPFPSLCDLCERLRGRLVSGGRSETDEEEE-----             |
| Eufriesea_mexicana_1         | -----NRSNVCDCERLRGRS-----                               |
| Eufriesea_mexicana_2         | -----                                                   |
| Bombus_terrestris            | HDGPPLSLFLPNRQNSNVCDLCERLRGRS-----                      |
| Bombus_impatiens             | HDGPPLSLFLFLPNRQNSNVCDLCERLRGRS-----                    |
| Polistes_dominula_X1         | NN-----NHHQFATRTRCVCERLHGSSLNSSDHRFDEIDTNYNN-----       |
| Cephus_cinctus_X1            | -----SRLRCEICKRLCPTE-----                               |
| Dinoponera_quadriceps_X2     | -----SPASTSMCDRLRDRT--D--RDLLDVI-----                   |
| Harpegnathos_saltator_X1     | -----SPSTTSVCERLRHRT--D--RDLLGAI-----                   |
| Linepithema_humile_X2        | -----MACDLCERLRGRT--D--GHFDLVDAI-----                   |
| Linepithema_humile_X1        | -----MACDLCERLRGRT--D--GHFDLVDAI-----                   |
| Ooceraea_biroi               | -----SAVTCDCERLRGRT--G--RRSDPVDAT-----                  |
| Camponotus_floridanus        | PS-----ESTSMSTTCDLCERLRGQT--D--GCSDTMDAI-----           |
| Solenopsis_invicta           | -----STACDLCERLRGQT--G--RCYDSVDRVDRVD-----              |
| Pogonomyrmex_barbatus_X1     | TS-----ASTTCDLCERLRGRT--GGSNASSDVSAI-----               |
| Vollenhovia_emeryi_X1        | PA-----PATACDLCERLRG--C--YDSVDAT-----                   |
| Wasmannia_auropunctata       | PV-----TTTACDLCVRLRGQT--S--YDSVDAI-----                 |
| Cyphomyrmex_costatus         | -----ISKTKEASCSLMHRL-----                               |
| Trachymyrmex_septentrionalis | SA-----STTACDLCERLRGQT--G--YEPVNAT-----                 |
| Atta_colombica               | -----                                                   |
| Trachymyrmex_cornetzi        | PA-----STITCDLCERLRGQT--G--YESVNAI-----                 |
| Acromyrmex_echinatior        | SA-----STTACDLCERLRGQT--G--YESVNAI-----                 |
| Atta_cephalotes              | PA-----STTACDLCERLRGQT--G--YESVNAV-----                 |

|                               |                                                           |
|-------------------------------|-----------------------------------------------------------|
| Drosophila_melanogaster       | ----LRTLHSLLLLMFNCGIFNKRRRRQHQQQHHHHYQHHHQH-----HQQHLQRQQ |
| Halyomorpha_halys             | -----                                                     |
| Rhodnius_prolixus             | -----                                                     |
| Cimex_lectularius_X1          | -----RRAQHARVNSLLRDSAPTKQN-----S                          |
| C_lectularius_X2              | -----                                                     |
| Cryptotermes_secundus         | -----                                                     |
| Miniopterus_natalensis        | -----RSSVHEAGPATNSSNPPIACE-----                           |
| Callithrix_jacchus            | -----                                                     |
| Heterocephalus_glaber_X1      | -----                                                     |
| Dasypus_novemcinctus          | -----                                                     |
| Tupaia_chinensis_X2           | -----                                                     |
| Homo_sapiens_X1               | -----                                                     |
| Pongo_abelii_2                | -----                                                     |
| Pan_troglodytes_X2            | -----                                                     |
| Boleophthalmus_pectinirostris | -----                                                     |
| Larimichthys_crocea_X2        | -----                                                     |
| Larimichthys_crocea           | -----                                                     |
| Lates_calcarifer              | -----                                                     |
| Seriola_lalandi_dorsalis      | -----                                                     |
| Seriola_dumerili              | -----                                                     |
| Zootermopsis_nevadensis       | -----                                                     |
| Parasteatoda_tepidarium       | -----RRSMPP-----                                          |
| Onthophagus_nigriiventris     | -----                                                     |
| Nicrophorus_vespilloides      | -----                                                     |
| Tribolium_castaneum           | -----                                                     |
| Nilaparvata_lugens            | -----                                                     |
| Blattella_germanica           | -----                                                     |
| Nasonia_vitripennis_X1        | -----RRGSRRKNHHQREDSGRRR-----KYDDNTEKD                    |
| Microplitis_demolitor         | -----NKSSMNDKSRVKTD-----WRSDKVTLI                         |
| Neodiprion_lecontei           | -EEKKKKDEEDHRG-----KRRSRLFSRGFFNASSKLEPL-----AMDCGRQS     |

|                              |                                                           |
|------------------------------|-----------------------------------------------------------|
| Athalia_rosae                | YTDGRNRNRNGH-----QTKRGSKEYGDVNDGCTGHPMDPVSPSPMDCGRRC      |
| Orussus_abietinus            | -----SYRQGYLQRLFFAFSSGKIG-----ST-----C                    |
| Dufourea_novaeangliae        | -----DSPERRTIGDRETIRRGHEVSRDPDHAMTLRSRTFEEDRFC            |
| Megachile_rotundata_X1       | -----                                                     |
| Melipona_quadrifasciata      | -----                                                     |
| Apis_mellifera_X1            | -----G---GRGRMTRRGRSVADRGHASAGVVSADKRR-----               |
| Eufriesea_mexicana_1         | -----RNCSTLDGTAEGRFDRAPRREQRRPLVPHADHAVAT                 |
| Eufriesea_mexicana_2         | -----                                                     |
| Bombus_terrestris            | -----CDYSTLDEKSTEGRFDRITRRGQRQVVNRDVNHTMIS                |
| Bombus_impatiens             | -----CDYSTLDEKSTEGRFDRITRRGQRQVVNRDVNHTMIS                |
| Polistes_dominula_X1         | -SSSTSSSSSSSTS---TSTSSSTSSSPKYCRSFYEVSSKSIR-----RKDDKDKWI |
| Cephus_cinctus_X1            | -----EPEEEHPTKSSRQIPCKHKKILASISC                          |
| Dinoponera_quadriceps_X2     | ----RT--EDGLVV---GRS--RRKRDE-NDTLTNH-SEATDQ-----KR-DRTSKC |
| Harpegnathos_saltator_X1     | ----RT--EAGLALGRRYGRP--RWKRDERDDSTNHSSEATDE-----ER-DRTTKC |
| Linepithema_humile_X2        | ----RT--EDSRMA---DWPS-RRRDE-NNSLTSD-SKASGE-----KR-DRTSRC  |
| Linepithema_humile_X1        | ----RT--EDSRMA---DWPS-RRRDE-NNSLTSD-SKASGE-----KR-DRTSRC  |
| Ooceraea_biroi               | ----RT--EDVLAA---DRRPLRRKQHD-ENGSSKSDLAAIE-----KR-DRTLRC  |
| Camponotus_floridanus        | ----RT--EEHFG---QRD--RRKRDE-SANSRAK----IVE-----KR-DRTLRC  |
| Solenopsis_invicta           | -ATEWT--GDSHAA---DRSS-RRKSDE-NDLSVND-SRVTV-----KR-DRTLKC  |
| Pogonomyrmex_barbatus_X1     | ----WT--RDSHAA---DHQSPRRKRDE-NDLSACDSAEPVIG-----RR-DRTLRC |
| Vollenhovia_emeryi_X1        | ----WT--GDSHVA---HRSS-RRKRDK-NDSLAND-SGAIVG-----KR-DRTLRR |
| Wasmannia_auropunctata       | ----WTPGDGSHVA---DRSS-RRKRDK-NDSPANDSSEATVG-----KRGNRTLRC |
| Cyphomyrmex_costatus         | -----                                                     |
| Trachymyrmex_septentrionalis | ----RT--GDSHVA---DR-S-RRKREK-NDLLTND-SKTTV-----           |
| Atta_colombica               | -----RARRDL-ALSIVN-----SRKLCC                             |
| Trachymyrmex_cornetzi        | ----WT--GDGHVA---DR-S-RRKRDK-NDLLTND-SKTTVG-----KR-DRTLRR |
| Acromyrmex_echinator         | ----WT--GDSHAA---DR-S-RRKRDK-NDLLTND-SKTTVG-----KR-DRTLRC |
| Atta_cephalotes              | ----WT--GDNHVA---DR-S-RRKRDK-NDLLTND-SKTTVG-----KR-DRTLRC |

|                               |                                                         |
|-------------------------------|---------------------------------------------------------|
| Drosophila_melanogaster       | ANVSYTKFLLLLQTLAAATTRLSLSPKNY-----                      |
| Halyomorpha_halys             | -----MQAALGLY-----                                      |
| Rhodnius_prolixus             | -----HQEMIVYW-----                                      |
| Cimex_lectularius_X1          | WRTGSPSISTCERTDLTFVMLLAFW-----                          |
| C._lectularius_X2             | -----MLLAFW-----                                        |
| Cryptotermes_secundus         | -----MWNML-----CA-----                                  |
| Miniopterus_natalensis        | -----                                                   |
| Callithrix_jacchus            | -----                                                   |
| Heterocephalus_glaber_X1      | -----MGAW-----                                          |
| Dasytus_novemcinctus          | -----                                                   |
| Tupaia_chinensis_X2           | -----                                                   |
| Homo_sapiens_X1               | -----                                                   |
| Pongo_abelii_2                | -----                                                   |
| Pan_troglodytes_X2            | -----                                                   |
| Boleophthalmus_pectinirostris | -----MWLRT-----                                         |
| Larimichthys_crocea_X2        | -----MVSYPESVMWLRT-----                                 |
| Larimichthys_crocea           | -----                                                   |
| Lates_calcarifer              | -----MVSYPESV-----                                      |
| Seriola_lalandi_dorsalis      | -----MVSYPESV-----                                      |
| Seriola_dumerili              | -----MVSYPESV-----                                      |
| Zootermopsis_nevadensis       | -----MW-----                                            |
| Parasteatoda_tepidariorum     | -----                                                   |
| Onthophagus_nigriventris      | -----LADTGRLCSWLLVAV-----                               |
| Nicrophorus_vespilloides      | -----                                                   |
| Tribolium_castaneum           | -----                                                   |
| Nilaparvata_lugens            | -----TRRGGGLRGGYGDDVSW-----                             |
| Blattella_germanica           | -----MDTDWWRW-----                                      |
| Nasonia_vitripennis_X1        | FR-----STTTSTRRRRSASSV-VRWVSA-----KC-----               |
| Microplitis_demolitor         | NRQCFM-KPMYRCGIVKSAASV-VRW-----                         |
| Neodiprion_lecontei           | DVASSLSSTTTT-RRPSCSSLSVLFRLN-----STINVSTIFFIV           |
| Athalia_rosae                 | DV-----PLQCLRCASSV-VRWRSVPTSHNDRDGVYVDNYTGDKTSNEETNNKHL |
| Orussus_abietinus             | RR-----DSVDEGRWLRCASSV-VRWTQG-----KR-----               |
| Dufourea_novaeangliae         | HA-----TTSTSPFTSRSCGPSDVRW-----                         |
| Megachile_rotundata_X1        | -----SSSSSSSSSNVSSVVRW-----                             |
| Melipona_quadrifasciata       | -----                                                   |
| Apis_mellifera_X1             | -----RPDDGPSSSGCVSSV-VRWNST-----                        |
| Eufriesea_mexicana_1          | SRITECDRLRPDASSSYVSSV-VRW-----                          |
| Eufriesea_mexicana_2          | -----                                                   |
| Bombus_terrestris             | SKISQRDLVSDASSTSYVSSV-VRW-----                          |
| Bombus_impatiens              | SKISQRDLVSDASSTSYVSSV-VRW-----                          |
| Polistes_dominula_X1          | TRENNYSSMQNRGENSRYASSV-VRW-----                         |

Cephus\_cinctus\_X1  
Dinoponera\_quadriceps\_X2  
Harpegnathos\_saltator\_X1  
Linepithema\_humile\_X2  
Linepithema\_humile\_X1  
Ooceraea\_biroi  
Camponotus\_floridanus  
Solenopsis\_invicta  
Pogonomyrmex\_barbatus\_X1  
Vollenhovia\_emeryi\_X1  
Wasmannia\_auropunctata  
Cyphomyrmex\_costatus  
Trachymyrmex\_septentrionalis  
Atta\_colombica  
Trachymyrmex\_cornetzi  
Acromyrmex\_echinator  
Atta\_cephalotes

RR-----NRVDQGRWLRSASSV-VRW-----  
DR----VPLCE-SSARCASSV-VRW-GS-----VA-----  
DR----VPLCE-SSVRCASSV-VRW-SS-----VA-----  
DR----IPLDE-SSARCASNV-VRW-KL-----AS-----  
DR----IPLDE-SSARCASNV-VRW-KL-----AS-----  
DR----VPAVE-SSARCASSV-VRW-NL-----AV-----  
DR----LSRYESSARCASSV-VRWNHL-----AA-----  
DR----TPLRE-SSARCASSV-VRW-IF-----AA-----  
DR----TPIRE-SSARCASSV-VRW-IF-----AV-----  
DR----TPLRE-SSARCASSV-VRW-IF-----AV-----  
DR----TLLRE-SSARCASSV-VRW-IF-----AG-----  
-----NCCTLMLLRA-----  
-----VINSV-TIW-FS-----SV-----  
DR----TPLRE-SSAKCASNV-VRW-MF-----SI-----  
DR----TPLHE-SSAKCASSV-VRW-IF-----SI-----  
DR----TPLHE-SSAKCASSV-VRW-IF-----SI-----

Drosophila\_melanogaster  
Halyomorpha\_halys  
Rhodnius\_prolixus  
Cimex\_lectularius\_X1  
C.\_lectularius\_X2  
Cryptotermes\_secundus  
Miniopterus\_natalensis  
Callithrix\_jacchus  
Heterocephalus\_glaber\_X1  
Dasypus\_novemcinctus  
Tupaia\_chinensis\_X2  
Homo\_sapiens\_X1  
Pongo\_abelii\_2  
Pan\_troglodytes\_X2  
Boleophthalmus\_pectinirostris  
Larimichthys\_crocea\_X2  
Larimichthys\_crocea  
Lates\_calcarifer  
Seriola\_lalandi\_dorsalis  
Seriola\_dumerili  
Zootermopsis\_nevadensis  
Parasteatoda\_tepidarium  
Onthophagus\_nigriventris  
Nicrophorus\_vespilloides  
Tribolium\_castaneum  
Nilaparvata\_lugens  
Blattella\_germanica  
Nasonia\_vitripennis\_X1  
Microplitis\_demolitor  
Neodiprion\_lectei  
Athalia\_rosae  
Orussus\_abietinus  
Dufourea\_novaeangliae  
Megachile\_rotundata\_X1  
Melipona\_quadrifasciata  
Apis\_mellifera\_X1  
Eufriesea\_mexicana\_1  
Eufriesea\_mexicana\_2  
Bombus\_terrestris  
Bombus\_impatiens  
Polistes\_dominula\_X1  
Cephus\_cinctus\_X1  
Dinoponera\_quadriceps\_X2  
Harpegnathos\_saltator\_X1  
Linepithema\_humile\_X2  
Linepithema\_humile\_X1  
Ooceraea\_biroi  
Camponotus\_floridanus  
Solenopsis\_invicta  
Pogonomyrmex\_barbatus\_X1  
Vollenhovia\_emeryi\_X1  
Wasmannia\_auropunctata

-----KQQQQLQHNQQLPRATPQQKQQEKDRHKCFHYKH  
-----  
-----AARKGSLFRLRPGRGVKA-----  
-----MGAGSRRG-----  
-----GARG-----  
-----XMGAGGRRG-----  
-----MGAGDRRG-----  
-----MATGGRRG-----  
-----MGTGGRRG-----  
-----MGTGGRRG-----  
-----HTGGLDMCLV-----  
-----MAATGLTTGGALLFA-----  
-----GVVSVLAA-----  
-----RWQS-----  
-----SRTKIARTTGFWPG-----  
-----SEGGTF--SWFG-----  
LFIANLNYASTTSAHGVY-----DTS DNRYNSNGRHTQH-----  
QYYSKSSPPTTPQRSTSSSSSSSSSSSSSSSSSSSSRLPDNKQTSCLSKYFLNKSASIYS  
-----RM-----PWQI-----  
-----HSWTERSFRWTRKGPS-----  
-----SWNSRRT-----  
-----RSARSLPATSHEQQT-----  
-----ISRLESIWTRQKQ-----  
-----SLRPERSFRWTRQKHA-----  
-----SLRPERSFRWTRQKHA-----  
-----KNLC-YWRL-----  
-----WCTQNFLISWQR-----  
-----RFAGR-SSK-SWRR-----  
-----RLVGR--SK-SWRR-----  
-----RLQA--KST-EWRR-----  
-----RLQA--KST-EWRR-----  
-----RFQD--KST-KWQRI-----  
-----GFH--KST-EWRR-----  
-----RFYADFKSI-EWRR-----  
-----RFYDLKSA-EWRR-----  
-----RFHRDFKLT-EWRK-----  
-----RLYGDFKLT-EWRR-----



|                              |                          |
|------------------------------|--------------------------|
| Cyphomyrmex_costatus         | -----RRDLALVEHTR-----    |
| Trachymyrmex_septentrionalis | -----                    |
| Atta_colombica               | -----T-----              |
| Trachymyrmex_cornetzi        | -----RFYKDFKSI-EWRR----- |
| Acromyrmex_echinatior        | -----RFYRDFKST-EWRR----- |
| Atta_cephalotes              | -----RFYRDFKST-EWRR----- |

|                               |                               |                                  |              |
|-------------------------------|-------------------------------|----------------------------------|--------------|
| Drosophila_melanogaster       | NYSYSPGISLLLFIILLANTLAIQAVVLP | PAHQHLLHNDIADGLDKTALS            | SVSGTQTRWPRS |
| Halyomorpha_halys             | -----VLWLAYFGAAR-----         |                                  |              |
| Rhodnius_prolixus             | -----VL--LYCTGITFL-----       | ILGMQPAYTK-----                  |              |
| Cimex_lectularius_X1          | -----RIWWLLTIALSST-----       | VMGR-----                        |              |
| C.lectularius_X2              | -----RIWWLLTIALSST-----       | VMGR-----                        |              |
| Cryptotermes_secundus         | -----YMYVYLCIGLLVT-----       | CSVTQVAKEGGK-----                |              |
| Miniopterus_natalensis        | -----LTCHAFICIFSLV-----       |                                  |              |
| Callithrix_jacchus            | -----AAAAPLLVAVAAL-----       | LLGAAGQMPGPE-----                |              |
| Heterocephalus_glaber_X1      | -----AATAPLLVAAAAL-----       | LVGVTHGLYPGE-----                |              |
| Dasypus_novemcinctus          | -----AAAAPLLVAVAAL-----       | LVGAAGHLYPGE-----                |              |
| Tupaia_chinensis_X2           | -----AAAAPLLVAVAAL-----       | LVGAAGHLYPGE-----                |              |
| Homo_sapiens_X1               | -----AAAAPLLVAVAAL-----       | LLGAAGHLYPGE-----                |              |
| Pongo_abelii_2                | -----AAAAPLLVAVAAL-----       | LLGAAGHLYPGE-----                |              |
| Pan_troglodytes_X2            | -----AAAAPLLVAVAAL-----       | LLGAAGHLYPGE-----                |              |
| Boleophthalmus_pectinirostris | -----LCFVVAVCILSC-----        | HRANGE-----                      |              |
| Larimichthys_crocea_X2        | -----LCFVLTACCLMMS-----       | C---HRASGE-----                  |              |
| Larimichthys_crocea           | -----MCLRGESLQTCVG-----       | ETLPNL-----                      |              |
| Lates_calcarifer              | -----MCLRTLFCVLTAV-----       | CFLMSCHRTAGE-----                |              |
| Seriola_lalandi_dorsalis      | -----MCLRTLFCILTAV-----       | CIVMSCHRVGTGE-----               |              |
| Seriola_dumerili              | -----MCLRTLFCILTAV-----       | CIVMSCHRVGTGE-----               |              |
| Zootermopsis_nevadensis       | -----FILVLLLLGLPLS-----       | RVDGTVTISLSNPATGGNATTQMTSER----- |              |
| Parasteatoda_tepidariorum     | -----LLHLVLLLVFLLS-----       | TGEAQRPDREYK-----                |              |
| Onthophagus_nigriiventris     | -----VVFGEYCNLPVTH-----       | AGYITEYNGFTPYNKTSG-----          |              |
| Nicrophorus_vespilloides      | -----GALLAFISSTPTT-----       | SEKMPITAGLSPKAHAYIHS-----        |              |
| Tribolium_castaneum           | -----MASNPVGLHKHSV-----       | SQIPNVKLHSGRSHS-----             |              |
| Nilaparvata_lugens            | -----VCCLLLCLANPVE-----       | AFASLGTLPRLPRVDLSTDRSSPDARG----- |              |
| Blattella_germanica           | -----VIIIFFFVMMVPA-----       | QLIPQNDIKVVQKSG-----             |              |
| Nasonia_vitripennis_X1        | -----ALSTGVLLMLLL-----        | TLGRAVAENAKTAVEGTAPN-----        |              |
| Microplitis_demolitor         | -----LIWIILILCPIVT-----       | ASFTERSTQTFHPTEGE-----           |              |
| Neodiprion_lecontei           | -----FDHAVRIDSSSS-----        | SSSAVAAAATSSSSSTSSSA-----        |              |
| Athalia_rosae                 | SVRLKFSWTFALIIILT-----        | ANVNVANAQVNRVNTEISTAVTKRD-----   |              |
| Orussus_abietinus             | -----LWLTAMVLLTLA-----        | A--PCVIADSQNSILANTSV-----        |              |
| Dufourea_novaeangliae         | -----LAWTILFLLVLVF-----       | PALAGLQKGISKSSSKEDG-----         |              |
| Megachile_rotundata_X1        | -----LLWTFLLFLLVLVF-----      | PALADPKKETSRSLSKEDG-----         |              |
| Melipona_quadriasciata        | -----MSSLACGGFDPPG-----       | PDRPAMMEKKGEGRKEQLGG-----        |              |
| Apis_mellifera_X1             | -----LWTILFLLVLVLV-----       | FSASADLQKPTSRERSKKEG-----        |              |
| Eufriesea_mexicana_1          | -----FAWMILFLLVLVF-----       | PASADLQKGTSSGSSKEEG-----         |              |
| Eufriesea_mexicana_2          | -----MV-----                  |                                  |              |
| Bombus_terrestris             | -----LAWTILFLLVLVP-----       | STSANLQKGISRGSSKEEG-----         |              |
| Bombus_impatiens              | -----LAWTILFLLVLVP-----       | STSANLQKGMSRGSSKEEG-----         |              |
| Polistes_dominula_X1          | -----AFSIALFL--AL-----        | TFPPNAVASLQRK-HSVGYS-----        |              |
| Cephus_cinctus_X1             | -----LTAIILLIIASFV-----       | LPASAEFLSPPIITEVTASSSKTE-----    |              |
| Dinoponera_quadricaps_X2      | -----LFSIILLIL--AL-----       | SGLVAAQRR--TAIGPS-----           |              |
| Harpegnathus_saltator_X1      | -----LFSVIFLL--AL-----        | PGLVTAQRH--TAMGPS-----           |              |
| Linepithema_humile_X2         | -----LMWIVFLLAMVSM-----       | VIHPGLAAAQKN-ISTVKSF-----        |              |
| Linepithema_humile_X1         | -----LMWIVFLLAMVSM-----       | VIHPGLAAAQKN-ISTVKSF-----        |              |
| Ooceraea_biroi                | -----LLWIAVLIL-ASV-----       | PNLAMAQQSKFGAIGPL-----           |              |
| Camponotus_floridanus         | -----LLWIVFLVFLASS-----       | PDLAAQQN--STDG-----              |              |
| Solenopsis_invicta            | -----FLWIVLFIF--AI-----       | CNLAAANNI--AIGPSR-----           |              |
| Pogonomyrmex_barbatus_X1      | -----LFWIVLLML--AV-----       | PDLAAAKEN--KTADDK-----           |              |
| Vollenhovia_emeryi_X1         | -----LLWIVLLIL--AV-----       | PDLAAAHDA--ANSGPS-----           |              |
| Wasmannia_auropunctata        | -----LLWIVFLIL--AV-----       | PDFAAAHTD--A-IGRS-----           |              |
| Cyphomyrmex_costatus          | -----NHCIVNVGVSVSA-----       | LLIPSRYVSFVA-----                |              |
| Trachymyrmex_septentrionalis  | -----                         |                                  |              |
| Atta_colombica                | -----                         |                                  |              |
| Trachymyrmex_cornetzi         | -----LLWIVLLIL--TV-----       | PDLAAAHDT--G-LDNG-----           |              |
| Acromyrmex_echinatior         | -----LLWIVLLIL--TI-----       | PDLAAAHDT--D-LDNG-----           |              |
| Atta_cephalotes               | -----LLWIVLLIL--TV-----       | PDLAAAHDT--G-LDNG-----           |              |

|                         |                                                            |
|-------------------------|------------------------------------------------------------|
| Drosophila_melanogaster | ESNPTMRLSQNVK-PCKSMDIRNMVSHF-----NQLENCTVIEGFLIDLINDASP--- |
| Halyomorpha_halys       | -----VCPSMDIRNSASAL-----LNLEPCSRIQGYLQIVLMENETESNF         |
| Rhodnius_prolixus       | -----ICPSMDIRNTVSAL-----NKLACRVIDGYFSFVLIDYADESEY          |

|                               |                                                              |
|-------------------------------|--------------------------------------------------------------|
| Cimex_lectularius_X1          | -----TCPSMDIRNNVTNF-----NLLRGCSVIDGFLHIVLIDKSSQQDF           |
| C_lectularius_X2              | -----TCPSMDIRNNVTNF-----NLLRGCSVIDGFLHIVLIDKSSQQDF           |
| Cryptotermes_secundus         | -----ICRSMDIRNRVQAL-----QRLSGCRVVEGFVRVVLIDRANETDY           |
| Miniopterus_natalensis        | -----VCPMSDIRNNLTRL-----HELANCSVIEGHLQILLMFKTRPEDF           |
| Callithrix_jacchus            | -----VCPGMDIRNNLSRL-----HELENCVIEGHLQILLMFKTRPEDF            |
| Heterocephalus_glaber_X1      | -----VCPGMDIRNNLTRL-----HRENCSSIIEGHLQILLMFKTKPEDF           |
| Dasypus_novemcinctus          | -----VCPGMDIRNNLTRL-----HELENCVIEGHLQILLMFKTRPEDF            |
| Tupaia_chinensis_X2           | -----VCPGMDIRNNLTRL-----RELENCVIEGHLQILLMFKTRPEDF            |
| Homo_sapiens_X1               | -----VCPGMDIRNNLTRL-----HELENCVIEGHLQILLMFKTRPEDF            |
| Pongo_abelii_2                | -----VCPGMDIRNNLTRL-----HELENCVIEGHLQILLMFKTRPEDF            |
| Pan_troglodytes_X2            | -----VCPGMDIRNNLTRL-----HELENCVIEGHLQILLMFKTRPEDF            |
| Boleophthalmus_pectinirostris | -----ICSSKDIRNNVTNL-----QVLENCIIIEGHLKILLMFRTKAEDNF          |
| Larimichthys_crocea_X2        | -----VCPSKDIRNNVTNL-----QTLENCTVIEGHLKILLMFRTKPEDF           |
| Larimichthys_crocea           | -----VCPSKDIRNNVTNL-----QTLENCTVIEGHLKILLMFRTKPEDF           |
| Lates_calcarifer              | -----VCPSKDIRNNVTNL-----QTLENCTVIEGHLKILLMFRTKPEDF           |
| Seriola_lalandi_dorsalis      | -----ICPNKDIRNNVTNL-----QSLNCTVIEGHLKILLMFRTKPEDF            |
| Seriola_dumerili              | -----ICPNKDIRNNVTNL-----QSLNCTVIEGHLKILLMFRTKPEDF            |
| Zootermopsis_nevadensis       | -----ICVSDIRNSVREF-----EQLRGCTVVEGFVRIVLIDRANESDF            |
| Parasteatoda_tepidarium       | -----VCRSIDIRNKVENF-----KKLENCTVIEGSLQILLIDHGKAQDY           |
| Onthophagus_nigriventris      | -----ICKSVDIRNSGEMF-----ENLRGCRVVEGFVQILLIDHAKESDTF          |
| Nicrophorus_vespilloides      | -NTSG-----ICKSIDVRNSMQAL-----LNLRGCRVVEGFVQISLSDAEDTEF       |
| Tribolium_castaneum           | -----FCEVDIRNTLDSF-----NRLKGCHVVEGFVQILLFDNVNETEL            |
| Nilaparvata_lugens            | -----VCQSLDIRNAAREF-----HQLQGCQVVEGFVQIVLMDKAVESEF           |
| Blattella_germanica           | -----VCPSIDIRNRVEAF-----KRLNGCKVVEGFVQILLIDNAESESF           |
| Nasonia_vitripennis_X1        | -HASGR-----VCQSIDIRNKLSEF-----SKLDGCRVVEGFVQILLLENTNEAHF     |
| Microplitis_demolitor         | -----VCQSIDIRNSVTQF-----SRLKGCRLVVEGFVQILLIDHADDAYS          |
| Neodiprion_lecontei           | -KRT-----VCQSVDIRNSVNQF-----SRLEGCRVVEGFVQILLIDHANDTSY       |
| Athalia_rosae                 | -----VCQSVDIRNSVHQF-----SRLEGCRVVEGFVQILLIDHADDSHY           |
| Orussus_abietinus             | -ANTFNKT-----VCQSVDIRNNVNQF-----SRLDGCRLVVEGFVQILLIDNADDQSY  |
| Dufourea_novaeangliae         | -----VCQSIDVRNSVSSF-----SKLNGCRVVEGFVQILLIDHADDSEF           |
| Megachile_rotundata_X1        | -----VCQSIDIRNVVHHF-----SRLKGCRLVVEGFVQILLIDNAEPSEF          |
| Melipona_quadrfasciata        | -----LHAVKHARRYVIGFRAAWTAATLSGCRVVEGFVQILLIDNAEPAEF          |
| Apis_mellifera_X1             | -----VCQSIDIRNTVRQF-----SRLKGCRLVVEGFVQILLIDNAEPSEY          |
| Eufriesea_mexicana_1          | -----VCQSIDIRNSVRHF-----SRLKGCRLVQGFVQILLIDNAEPSEY           |
| Eufriesea_mexicana_2          | -----VCQSIDIRNSVRHF-----SRLKGCRLVQGFVQILLIDNAEPSEY           |
| Bombus_terrestris             | -----VCQSIDIRNSVRYF-----SRLKGCRLVVEGFVQILLIDNAEPSEY          |
| Bombus_impatiens              | -----VCQSIDIRNSVRYF-----SRLKGCRLVVEGFVQILLIDNAEPSEY          |
| Polistes_dominula_X1          | -KKDG-----VCQSIDIRNSVNQF-----SRLQGCRLVVEGFVQILLIDHADDASF     |
| Cephus_cinctus_X1             | -----VCQSVDIRNSVSEF-----SRLEGCRVVEGFVQILLIDRADDLAY           |
| Dinoponera_quadriciceps_X2    | -KKGG-----VCQSIDIRNSVDQF-----SRLEGCRVVEGFVQILLIDKANQASY      |
| Harpegnathos_saltator_X1      | -IKDG-----VCQSIDIRNSVDQF-----SRLEGCRVVEGFVQILLIDRANHTAY      |
| Linepithema_humile_X2         | -NTDG-----VCQSIDIRNSVNEL-----SKLEGCRVVEGFVQILLIDRAEPSNY      |
| Linepithema_humile_X1         | -NTDG-----VCQSIDIRNSVNEL-----SKLEGCRVVEGFVQILLIDRAEPSNY      |
| Ooceraea_biroi                | -RKNG-----VCQSIDIRNNVNQF-----SKLEGCRVVEGFVQILLIDRAEQSAY      |
| Camponotus_floridanus         | -----VCQSIDIRNSVDQF-----LRLNGCRVVEGFVQILLIDRAEQSAY           |
| Solenopsis_invicta            | -NK-----VCQSIDIRNNVNEF-----SKLKGCVVEGFVQISLIDRAEPLDY         |
| Pogonomyrmex_barbatus_X1      | -GI-----VCESIDIRNSVDQFH-----PKLNCRVVEGFVQILLIDRAEPSDF        |
| Vollenhovia_emeryi_X1         | -NRDG-----VCQSIDIRNSVSQF-----SKLEGCRVVEGFVQILLIDRAEQSAY      |
| Wasmannia_auropunctata        | -NKDG-----VCQSIDIRNSVSQF-----SKLEGCRVVEGFVQILLIDRAEQSAY      |
| Cyphomyrmex_costatus          | -----VCQSIDIRNSVSDF-----SKLEGCRVVEGFVQILLIDRAEQSAY           |
| Trachymyrmex_septentrionalis  | -----VCQSIDIRNSVSEF-----SKLEGCRVVEGFVQILLIDRAEQSAY           |
| Atta_colombica                | -----VCQSIDIRNSVSEF-----SKLEGCRVVEGFVQILLIDRAEQSAY           |
| Trachymyrmex_cornetzi         | -GRNLICIVNVSSVAVCQSIDIRNSVSEF-----SKLEGCRVVEGFVQILLIDRAEQSAY |
| Acromyrmex_echinator          | -----VCQSIDIRNSVSEF-----SKLEGCRVVEGFVQILLIDRAEQSAY           |
| Atta_cephalotes               | -----VCQSIDIRNSVSEF-----SKLEGCRVVEGFVQILLIDRAEQSAY           |

\* . : \* \* : \* . . \*

|                          |                                                |
|--------------------------|------------------------------------------------|
| Drosophila_melanogaster  | LNRSFPKLTEVTDYIIIIY-----RVGTGLHLSLSKIFPNLSVIRG |
| Halyomorpha_halys        | ANLSFPKLSEVTSYVIFY-----RVHGLTSIGKLFPNLTIIGG    |
| Rhodnius_prolixus        | DNMTFPELREITSFLMVN-----KVSGLRSLGRLFPNLSIIRG    |
| Cimex_lectularius_X1     | ENVTFPDLREVTEYVLFY-----QVNGLTSLGEVFPNLAVIRG    |
| C_lectularius_X2         | ENVTFPDLREVTEYVLFY-----QVNGLTSLGEVFPNLAVIRG    |
| Cryptotermes_secundus    | YRFSFPELREITDYLLVY-----RVAGLTSIGKLFPNLTVIRG    |
| Miniopterus_natalensis   | RDLSFPNLIMITDYLLLF-----RVYGLESKDLFPNLTIVIRG    |
| Callithrix_jacchus       | RDLSFPFKLIMITDYLLLF-----RVYGLESKDLFPNLTIVIRG   |
| Heterocephalus_glaber_X1 | RDLSFPFKLIMITDYLLLF-----RVYGLESKDLFPNLTIVIRG   |
| Dasypus_novemcinctus     | RDLSFPFKLIMITDYLLLF-----RVYGLESKDLFPNLTIVIRG   |
| Tupaia_chinensis_X2      | RDLSFPFKLIMITDYLLLF-----RVYGLESKDLFPNLTIVIRG   |
| Homo_sapiens_X1          | RDLSFPFKLIMITDYLLLF-----RVYGLESKDLFPNLTIVIRG   |
| Pongo_abelii_2           | RDLSFPFKLIMITDYLLLF-----RVYGLESKDLFPNLTIVIRG   |
| Pan_troglodytes_X2       | RDLSFPFKLIMITDYLLLF-----RVYGLESKDLFPNLTIVIRG   |

|                               |                                                            |
|-------------------------------|------------------------------------------------------------|
| Boleophthalmus_pectinirostris | RGVSFPKLTVITDYLLMF-----RVYGLESLSDFPNLTLIRG                 |
| Larimichthys_crocea_X2        | RGLSFPKLIVVTDYLLLF-----RVYGLESLSDFPNLTVIRG                 |
| Larimichthys_crocea           | RGLSFPKLIVVTDYLLLF-----RVYGLESLSDFPNLTVIRG                 |
| Lates_calcarifer              | RGLSFPKLTVVTDYLLLF-----RVYGLESLSDFPNLTVIRG                 |
| Seriola_lalandi_dorsalis      | RGLSFPKLRVVTDYLLLF-----RVYGLESLSDFPNLTVIRG                 |
| Seriola_dumerili              | RGLSFPKLRVVTDYLLLF-----RVYGLESLSDFPNLTVIRG                 |
| Zootermopsis_nevadensis       | ENVTFPELREITCYLMLY-----RVVGLKNLGFLEPNLAVIRG                |
| Parasteatoda_tepidarium       | DYLSFPNLVEITDYLLVY-----RAFGLNSLGKLFPNLAVIRG                |
| Onthophagus_nigriiventris     | ENISFPELREITGHLLLY-----RVNGLTSLGKLFPNLAVIRG                |
| Nicrophorus_vespilloides      | EGISFPELTEITDFLLLY-----RVHGLRSVQGLFPNLAVIRG                |
| Tribolium_castaneum           | SLLSFPNLTEITDYLLLY-----RVNGLRSIGQLFPNLSVIRG                |
| Nilaparvata_lugens            | ANFSFPELREITGYLLLY-----RIDGLRTLNLFPNLAVIRG                 |
| Blattella_germanica           | ANLFPPELREITDYLLLY-----RVNGLRSIGSLFPNLTVIRG                |
| Nasonia_vitripennis_X1        | ENMSYPDLVEITGYFMVY-----RVQQLQSLGHLFPNLAVIRG                |
| Microplitis_demolitor         | TNLTFPDLVEITGYLLLY-----RVNGLRSVQGLFPNLTVIRG                |
| Neodiprion_lectei             | ANLTFPDLVEITGYLLLY-----RVNGLRSVGHLPNLTVIRG                 |
| Athalia_rosae                 | ANLTFPDLVEITGYLLLY-----RVNGLRSVGHLPNLTVIRG                 |
| Orussus_abietinus             | ANLTFPNLVEITGYLLLY-----RVYGLQSLGHLFPNLAVIRG                |
| Dufourea_novaeangliae         | ANITFPELREITGYLLFY-----RVKGLRSVGRLPNLTVIRG                 |
| Megachile_rotundata_X1        | VNISFPELREITGYLLLY-----RVKGLRSIGRLFPNLTVIRG                |
| Melipona_quadrfasciata        | ANISFPELKEITGYLLFY-----RVKGLRSIGRLFPNLSVIRG                |
| Apis_mellifera_X1             | TNISFPELREITGYLLLYSRLPLPLSFTALPSLSVSVLRVKGRLSIGRLFPNLTVIRG |
| Eufriesea_mexicana_1          | ANVSFPELKEITGYLLLY-----RVKGLRSIGRLFPNLTVIRG                |
| Eufriesea_mexicana_2          | ANVSFPELKEITGYLLLY-----RVKGLRSIGRLFPNLTVIRG                |
| Bombus_terrestris             | ANISFPELKEITGYLLLY-----RVKGLRSIGRLFPNLTVIRG                |
| Bombus_impatiens              | ANISFPELKEITGYLLLY-----RVKGLRSIGRLFPNLTVIRG                |
| Polistes_dominula_X1          | ANLTFPDLVEITEYLILY-----RVNGLRSVGRLPNLTVIRG                 |
| Cephus_cinctus_X1             | ANLTFPDLVEITGYLVLY-----RVNGLKSVGHLFPNLTVIRG                |
| Dinoponera_quadricaps_X2      | ANISFPELVEITGYLILF-----RVNGLRSIGHLFPNLTVIRG                |
| Harpegnathos_saltator_X1      | ANISFPQLVEITGYLILY-----RVSGRLSIGHLFPNLTVIRG                |
| Linepithema_humile_X2         | TDHVYPPELVEITGYLILY-----RVNGLRSIGHLFPNLTVIRG               |
| Linepithema_humile_X1         | TDHVYPPELVEITGYLILY-----RVNGLRSIGHLFPNLTVIRG               |
| Ooceraea_biroi                | ANLSFPDLVEITGYLVLY-----RVSGRLSVGRLPNLTVIRG                 |
| Camponotus_floridanus         | ANLSFPDLVEITGYLILY-----RVSGRLSIGRLFPNLTVIRG                |
| Solenopsis_invicta            | ANFSFPELVEITDFLLLY-----RVNGLKTIQGLFPNLAVIRG                |
| Pogonomyrmex_barbatus_X1      | ANISFPKLVEITGYLILY-----RVSGRLSVGHLPNLTVIRG                 |
| Vollenhovia_emeryi_X1         | ANLSFPDLVEITGYLILY-----RVNGLRAVGHLPNLTVIRG                 |
| Wasmannia_auropunctata        | DNISFPELVEITGYLILF-----RVSGRLTVGHLPNLTVIRG                 |
| Cyphomyrmex_costatus          | ANLSFPDLVEITGYLILY-----RVSGRLTVGHLPNLTVIRG                 |
| Trachymyrmex_septentrionalis  | ANLSFPDLVEITGYLILY-----RVSGRLTVGHLPNLTVIRG                 |
| Atta_colombica                | ANLSFPDLVEITGYLILY-----RVSGRLTVGHLPNLTVIRG                 |
| Trachymyrmex_cornetzi         | ANLSFPDLVEITGYLILY-----RVSGRLTVGHLPNLTVIRG                 |
| Acromyrmex_echinator          | ANLSFPPELVEITGYLILY-----RVSGRLTVGHLPNLTVIRG                |
| Atta_cephalotes               | ANLSFPDLVEITGYLILY-----RVSGRLTVGHLPNLTVIRG                 |
|                               | :*. * :* ... . ** : :**** : *                              |

|                               |                                                               |
|-------------------------------|---------------------------------------------------------------|
| Drosophila_melanogaster       | NK-LFDGYALVVYSNFDLMDLGLHKLRSITRGVRIEKNHKLCDRTIDWLEIL--AENE    |
| Halyomorpha_halys             | DL-LSVDYALIIITQMPHLKEIDLPELRLILRGSAIFKNPKLCYVDTVDWDLIA---TT   |
| Rhodnius_prolixus             | ER-LFLDYALVITNMQNLEIALTSVT-ILRGSAIAWNNKKLCYAETIDWDQIA--PGG-   |
| Cimex_lectularius_X1          | EK-LFLDYSFIVFQMPDLKTLKFSFI-ILRGSVVIANNNKLCYDNTIDWDKVA--VSGV   |
| C. lectularius_X2             | EK-LFLDYSFIVFQMPDLKTLKFSFI-ILRGSVVIANNNKLCYDNTIDWDKVA--VSGV   |
| Cryptotermes_secundus         | NS-LFVDYALVVYEMFQQLQEIQLRSLTAVLRGSRVFDKNPELCYVDTVDWRSIL--RN-- |
| Miniopterus_natalensis        | SR-LFFNYALVIFEMVHLKELGLYSLMNITRGSVRIEKNNELCYLATIDWSRIL--DSVE  |
| Callithrix_jacchus            | SR-LFFNYALVIFEMVHLKELGLYSLMNITRGSVRIEKNNELCYLATIDWSRIL--DSVE  |
| Heterocephalus_glaber_X1      | SR-LFFNYALVIFEMVHLKELGLYSLMNITRGSVRIEKNNELCYLATIDWSRIL--DSVE  |
| Dasypus_novemcinctus          | SR-LFFNYALVIFEMVHLKELGLYSLMNITRGSVRIEKNNELCYLATIDWSRIL--DSVE  |
| Tupaia_chinensis_X2           | SR-LFFNYALVIFEMVHLKELGLYNLMNITRGSVRIEKNNELCYLATIDWSRIL--DSVE  |
| Homo_sapiens_X1               | SR-LFFNYALVIFEMVHLKELGLYNLMNITRGSVRIEKNNELCYLATIDWSRIL--DSVE  |
| Pongo_abelii_2                | SR-LFFNYALVIFEMVHLKELGLYNLMNITRGSVRIEKNNELCYLATIDWSRIL--DSVE  |
| Pan_troglodytes_X2            | SR-LFFNYALVIFEMVHLKELGLYNLMNITRGSVRIEKNNELCYLATIDWSRIL--DSVE  |
| Boleophthalmus_pectinirostris | SN-LFFNYALVIFEMVHLKELGLHSLMNITRGAVRIEKNPDLCYSLTLDWSKIL--DSVA  |
| Larimichthys_crocea_X2        | NN-LFFNYALVMFEMQLQREIGLHSLMNITRGAVRIEKNPDLCYSLTLDWSKIL--DSVE  |
| Larimichthys_crocea           | NN-LFFNYALVMFEMQLQREIGLHSLMNITRGAVRIEKNPDLCYSLTLDWSKIL--DSVE  |
| Lates_calcarifer              | NN-LFFNYALVMFEMQLQREIGLHSLMNITRGAVRIEKNPDLCYSLTLDWSKIL--DSVE  |
| Seriola_lalandi_dorsalis      | NN-LFFNYALVMFEMQLQREIGLHSLMNITRGAVRIEKNPDLCYSLTLDWSKIL--DSVE  |
| Seriola_dumerili              | NN-LFFNYALVMFEMQLQREIGLHSLMNITRGAVRIEKNPDLCYSLTLDWSKIL--DSVE  |
| Zootermopsis_nevadensis       | NT-LFQDYALVVYEMVQLQELGLWGLAAILRGSVRIEKNYALCYNTVNWDAVT--NG--   |
| Parasteatoda_tepidarium       | NE-LFHNALVVFELQIQEIQLSNLTDILRGSVRIEKNPGLCYVETIEWDLIA--KEGK    |
| Onthophagus_nigriiventris     | QQPLLLGLYALIFEMPSLQEIQLGLSLTDMNGGIRIDKNPDLCFANTIDWNSKIL--HE-K |
| Nicrophorus_vespilloides      | QD-TVLGYSFIIYELSGIQEVGLYSLTDIQAQGLIRIDKNPELCFVNSIDWDKIA--HE-K |
| Tribolium_castaneum           | RS-TFYTYSFVVFEMSSIQEIQLGLSLTDITRGLIRIDKNPSLCFVNSIDWEAIA--HE-K |

|                              |                                                               |
|------------------------------|---------------------------------------------------------------|
| Nilaparvata_lugens           | NT-LFFNYALVVFEMHLQEMGLKSLTDIVRGAVHISKNPMLCYVDTIDWDKIA--RSSQ   |
| Blattella_germanica          | ET-LFLNYALVAFEMIHLQEIGLYSLTDILRGSVRFEKNPPLLCFVDTVEWDLIA--KKGR |
| Nasonia_vitripennis_X1       | HS-LFMNYAFVAFEMTSLQEIGLASLTDIMRGSVRFEKNPVLKYANTVDWDLIA--HAGK  |
| Microplitis_demolitor        | HS-LFINYALVAFEMMNLQEVGLYSLTDILRGSVRFEKNPMLCYVDTVWDIIA--KAGN   |
| Neodiprion_lecontei          | HS-LFINYALVAFEMMHLQEIGLHSLTNIGRGSVRFEKNPALCYVDTIDWDLII--GVGK  |
| Athalia_rosae                | HS-LFINYALVAFEMVHLQEIGLHSLTNIVRGTVRFEKNPALCYVDTIDWDLIT--GVGK  |
| Orussus_abietinus            | HS-LFFNYALVVFEMMHLQEIGLYSLTDILRGSVRFEKNPVLGNADTIDWDLIA--KAGK  |
| Dufourea_novaeangliae        | HS-LFINYALVAFEMMSLQEIGLHSLTTIVRGSVRFEKNHALCYVDTIDWDLIG--KAGK  |
| Megachile_rotundata_X1       | HS-LFINYALVAFEMMNLQEIGLHSLTTIVRGSVRFEKNPALCYVDTIDWDLIA--KAGK  |
| Melipona_quadrifasciata      | HS-LFINYALVVFEMMSLQEVGLHSLTTVVVRSVRFEKNPALCYVDTIDWDLIA--KSGK  |
| Apis_mellifera_X1            | HS-LFINYALVAFEMMNLQEIGLHSLTTIVRGSVRFEKNPALCYVDTIDWDLIA--KAGK  |
| Eufriesea_mexicana_1         | HS-LFINYALVAFEMMNLQEIGLHSLTTIVRGSVRFEKNPVLKYANTVDWDLIA--KAGK  |
| Eufriesea_mexicana_2         | HS-LFINYALVAFEMMNLQEIGLHSLTTIVRGSVRFEKNPVLKYANTVDWDLIA--KAGK  |
| Bombus_terrestris            | HS-LFINYALVAFEMMNLQEIGLHSLTTIVRGSVRFEKNPALCYVDTIDWDLIA--KAGK  |
| Bombus_impatiens             | HS-LFINYALVAFEMMNLQEIGLHSLTTIVRGSVRFEKNPALCYVDTIDWDLIA--KAGK  |
| Polistes_dominula_X1         | HS-LFINYALVAFEMMHLQEIGLHSLTDILRGSVRFEKNPALCYVDTIDWDLIA--KAGK  |
| Cephus_cinctus_X1            | HS-LFINYALVAFEMMHLQEIGLHSLTDILRGSVRFEKNPALCYVDTIDWDLIA--KAGK  |
| Dinoponera_quadriceps_X2     | HS-LFVNYALVAFEMMQLQEIGLHSLTTILRGSVRFEKNPVLKYANTVDWDLIA--KAGK  |
| Harpegnathos_saltator_X1     | RS-LFTNYALVAFEMMQLQEIGLHSLTTIQRGSVRFEKNPVLKYANTVDWDLIA--RAGK  |
| Linepithema_humile_X2        | HS-LFINYALVAFEMMHLQEIGLHSLTNILRGSVRFEKNPVLKYANTVDWDLIA--KAGK  |
| Linepithema_humile_X1        | HS-LFINYALVAFEMMHLQEIGLHSLTNILRGSVRFEKNPVLKYANTVDWDLIA--KAGK  |
| Ooceraea_biroi               | HS-LFINYALVAFEMMHLQELGLHSLTNILRGSVRFEKNPVLKYANTVDWDLIA--KAGK  |
| Camponotus_floridanus        | HS-LFINYALVAFEMMHLQEIGLHSLTNILRGSVRFEKNPVLKYANTVDWDLIA--KAGK  |
| Solenopsis_invicta           | NS-LIMNYALVAFEMMHLQEIGLHSLTNILRGSVRFEKNPVLKYANTVDWDLIA--KAGN  |
| Pogonomyrmex_barbatus_X1     | NS-LFINYALVAFEMMNLQEIGLHSLTNILRGSVRFEKNPVLKYANTVDWDLIA--KAGK  |
| Vollenhovia_emeryi_X1        | HS-LFINYALVAFEMMHLQEIGLHSLTNILRGSVRFEKNPVLKYANTVDWDLIA--KAGK  |
| Wasmannia_auropunctata       | HS-LFINYALVAFEMMHLQEIGLHSLTNILRGSVRFEKNPVLKYANTVDWDLIA--KAGK  |
| Cyphomyrmex_costatus         | HS-LFINYALVAFEMMHLQEIGLHSLTNILRGSVRFEKNPVLKYANTVDWDLIA--KAGK  |
| Trachymyrmex_septentrionalis | HS-LFINYALVAFEMMHLQEIGLHSLTNILRGSVRFEKNPVLKYANTVDWDLIA--KAGK  |
| Atta_colombica               | HS-LFINYALVAFEMMHLQEIGLHSLTNILRGSVRFEKNPVLKYANTVDWDLIA--KAGK  |
| Trachymyrmex_cornetzi        | HS-LFINYALVAFEMMHLQEIGLHSLTNILRGSVRFEKNPVLKYANTVDWDLIA--KAGK  |
| Acromyrmex_echinator         | HS-LFINYALVAFEMMHLQEIGLHSLTNILRGSVRFEKNPVLKYANTVDWDLIA--KAGK  |
| Atta_cephalotes              | HS-LFINYALVAFEMMHLQEIGLHSLTNILRGSVRFEKNPVLKYANTVDWDLIA--KAGK  |
|                              | *::: . * : : . : * : : . * ** ::* :                           |

|                               |                                                       |
|-------------------------------|-------------------------------------------------------|
| Drosophila_melanogaster       | TQLVVLTEGKEKECR-LS-----KCPGEIRIEEGHNTAIEGELNASC       |
| Halyomorpha_halys             | GSNFIVPAKDR---S--MCPGCG-----YCPP-----                 |
| Rhodnius_prolixus             | -DHFLVGNPITD-P-----ECPG-----                          |
| Cimex_lectularius_X1          | REYLFPPNDEKTN--C-----SCPS-----                        |
| C. lectularius_X2             | REYLFPPNDEKTN--C-----SCPS-----                        |
| Cryptotermes_secundus         | GEHFAASNKEVPL-CP-----SCPA-----                        |
| Miniopterus_natalensis        | DNYIVLNKDDNNE-CGDICPGTAGKGT-----NCPA-----TVI          |
| Callithrix_jacchus            | DNYIVLNKDDNNE-CGDICPGTAGKGT-----NCPA-----TVI          |
| Heterocephalus_glaber_X1      | DNYIVLNKDDNNE-CGDICPGTAGKGT-----NCPA-----TVI          |
| Dasypus_novemcinctus          | DNYIVLNKDDNNE-CGDICPGTAGKGT-----NCPA-----TVI          |
| Tupaia_chinensis_X2           | DNYIVLNKDDNNE-CGDICPGTAGKGT-----SCPA-----TVI          |
| Homo_sapiens_X1               | DNYIVLNKDDNNE-CGDICPGTAGKGT-----NCPA-----TVI          |
| Pongo_abelii_2                | DNYIVLNKDDNNE-CGDICPGTAGKGT-----NCPA-----TVI          |
| Pan_troglodytes_X2            | DNYIVLNKDDNNE-CGDICPGTAGKGT-----NCPA-----TVI          |
| Boleophthalmus_pectinirostris | DNYIVFNKNERE--CGDVCPGAAVGKT-----TCQT-----TTI          |
| Larimichthys_crocea_X2        | DNYIVANKNDRE--CGDVCPGAAVGKT-----TCQT-----TTI          |
| Larimichthys_crocea           | DNYIVANKNDRE--CGDVCPGAAVGKT-----TCQT-----TTI          |
| Lates_calcarifer              | DNYIMANKNDRE--CGDVCPGAAVGKT-----TCQT-----TTI          |
| Seriola_lalandi_dorsalis      | DNYIMANKNDRE--CGDVCPGAAVGKT-----TCQT-----TTI          |
| Seriola_dumerili              | DNYIMANKNDRE--CGDVCPGAAVGKT-----TCQT-----TTI          |
| Zootermopsis_nevadensis       | GEHVIALNKDSAS-CP--GQG-----MCDV-----                   |
| Parasteatoda_tepidariorum     | GGHFILKGNKKSAD-CPNTPCPGPPT-----VCPK-----              |
| Onthophagus_nigriventris      | AELFIRSSKKENE-CP-----MCP-----RMD                      |
| Nicrophorus_vespilloides      | GEHYIKNIKAENE-CP-LCPGEDEESS--LCPA-----SKN             |
| Tribolium_castaneum           | GEHFILKLNKSPNE-CP-ICPGDEKEDESGNSVAHIHCHK-----APHRSDSE |
| Nilaparvata_lugens            | GGHFITGNKKKNE-CP-ICQTNA-----VCPT-----                 |
| Blattella_germanica           | GEHFITGNKRSNPE-CP-MCANDLM-----HC-----R--              |
| Nasonia_vitripennis_X1        | GGNVISSNRPKNE-CP-VCEK-----DCPR-----R--                |
| Microplitis_demolitor         | GEHVIADNKLKLN-CP-VCEK-----HCPL-----R--                |
| Neodiprion_lecontei           | GEHVISGNKPRNG-CP-VCEK-----HCPT-----R--                |
| Athalia_rosae                 | GEHVISGNKPKNG-CP-VCEK-----NCPT-----R--                |
| Orussus_abietinus             | GEHVISSNKPKNV-CP-VCEK-----HCPT-----R--                |
| Dufourea_novaeangliae         | GEHVIAGNNPKNG-CP-VCEK-----HCPQ-----R--                |
| Megachile_rotundata_X1        | GENVISGNPKNG-CP-VCEK-----HCPQ-----S--                 |
| Melipona_quadrifasciata       | GEHIIVGNNPRNG-CP-VCEK-----HCPQ-----R--                |
| Apis_mellifera_X1             | GEHVISGNPKNA-CP-VCEK-----HCPQ-----R--                 |

|                              |                                          |
|------------------------------|------------------------------------------|
| Eufriesea_mexicana_1         | GEHVIAANNRKNNG-CP-VCEK-----RCPQ-----R--  |
| Eufriesea_mexicana_2         | GEHVIAANNRKNNG-CP-VCEK-----RCPQ-----R--  |
| Bombus_terrestris            | GEHVIAAGNNPRNG-CP-VCEK-----HCPQ-----R--  |
| Bombus_impatiens             | GEHVIAAGNNPRNG-CP-VCEK-----HCPQ-----R--  |
| Polistes_dominula_X1         | GEHVISGNKPKND-CP-ICEK-----NCTT-----RLI   |
| Cephus_cinctus_X1            | GEHVISGNKPKNG-CP-VCEK-----NCPD-----R--   |
| Dinoponera_quadricaps_X2     | GEYVISGNKLTNG-CP-MCEK-----SCPE-----K--   |
| Harpegnathos_saltator_X1     | GENVILGNKLTNG-CP-VCEK-----SCPE-----K--   |
| Linepithema_humile_X2        | GEHVISGNKPTNG-CP-ICDR-----NCPK-----K--   |
| Linepithema_humile_X1        | GEHVISGNKPTNG-CP-ICDR-----NCPK-----K--   |
| Ooceraea_biroi               | GEHVISGNKLTNG-CP-VCDK-----KCPA-----R--   |
| Camponotus_floridanus        | GEHVISGNKLTNG-CP-VCDK-----SCPS-----R--   |
| Solenopsis_invicta           | GEHFIKDNKPSNG-CP-MCPR-----KCPT-----R--   |
| Pogonomyrmex_barbatus_X1     | GGHVIMDNKPTNG-CP-VCDK-----KCPT-----R--   |
| Vollenhovia_emoryi_X1        | GGHFIKDNKPMNG-CP-MCDK-----RCPT-----R--   |
| Wasmannia_auropunctata       | GGHVIMDNKPTNG-CP-VCDKFL-----RCPI-----R-- |
| Cyphomyrmex_costatus         | GGHFIKDNKPTNG-CP-VCDK-----KCPT-----R--   |
| Trachymyrmex_septentrionalis | GGHFIKDNKPTNG-CP-VCDK-----KCPT-----R--   |
| Atta_colombica               | GGHFIKDNKPTNG-CP-VCDK-----KCPT-----R--   |
| Trachymyrmex_cornetzi        | GGHFIKDNKPTNG-CP-VCDK-----KCPT-----R--   |
| Acromyrmex_echinator         | GGHFIKDNKPTNG-CP-VCDK-----KCPT-----R--   |
| Atta_cephalotes              | GGHFIKDNKPTNG-CP-VCDK-----KCPT-----R--   |

\*

|                               |                                                               |
|-------------------------------|---------------------------------------------------------------|
| Drosophila_melanogaster       | QLHNNRRLCWNKLCQTKC----PEKCR--NNCIDEHT-----CCSQDCLGGCVIDKN     |
| Halyomorpha_halys             | -----RGNCWSRSHCQVL-----EW-----GT---DCHSECLGGC--SGP            |
| Rhodnius_prolixus             | -CAKNNLWCWSRNCQ--VCVYFISIINLIPPSLREWVTPDGE---PCDDECVGGC--TGL  |
| Cimex_lectularius_X1          | ---CSDGLCWSEKNCQL-----DLAES-----SCHQECVGGC--TGS               |
| C._lectularius_X2             | ---CSDGLCWSEKNCQL-----DLAES-----SCHQECVGGC--TGS               |
| Cryptotermes_secundus         | --SCESANCWGPGVCHSLR-----KN--ET---NCHRLCLGGC--TGL              |
| Miniopterus_natalensis        | NGQFVER-CWTHSHCQKVC----PTSCK--SHGCT-AE--GL---CCHSECLGNC--SEP  |
| Callithrix_jacchus            | NGQFVER-CWTHSHCQKVC----PTICK--SHGCT-AE--GL---CCHSECLGNC--SEP  |
| Heterocephalus_glaber_X1      | NGQFIER-CWTHSHCQKVC----PTMCK--SHGCT-TE--GL---CCHSECLGNC--SEP  |
| Dasypus_noveboracensis        | NGQFVER-CWTHSHCQKVC----PTVCK--SHGCT-AE--GL---CCHSECLGNC--SAP  |
| Tupaia_chinensis_X2           | NGQFVER-CWTHSHCQKVC----PTICK--SHGCT-AE--GL---CCHSECLGNC--SEP  |
| Homo_sapiens_X1               | NGQFVER-CWTHSHCQKVC----PTICK--SHGCT-AE--GL---CCHSECLGNC--SQP  |
| Pongo_abelii_2                | NGQFVER-CWTHSHCQKVC----PTICK--SHGCT-AE--GL---CCHSECLGNC--SEP  |
| Pan_troglodytes_X2            | NGQFVER-CWTHSHCQKVC----PTICK--SHGCT-AE--GL---CCHSECLGNC--SQP  |
| Boleophthalmus_pectinirostris | NGLFNER-CWNQKHCQKVC----PAHCK--HRACT-KD--GQ---CCHQCLGGC--SKP   |
| Larimichthys_crocea_X2        | NGHFVER-CWTQNHCHCQKVC----PVQCK--HRACT-KD--DQ---CCHQCLGGC--LKP |
| Larimichthys_crocea           | NGHFVER-CWTQNHCHCQKVC----PVQCK--HRACT-KD--DQ---CCHQCLGGC--LKP |
| Lates_calcarifer              | NGHFVER-CWTQNHCHCQKVC----PVQCK--HRACT-KD--DQ---CCHQCLGGC--LKP |
| Seriola_lalandi_dorsalis      | NGHFVER-CWTQNHCHCQKVC----PVQCK--HRACT-KE--DQ---CCHQCLGGC--LKP |
| Seriola_dumerili              | NGHFVER-CWTQNHCHCQKVC----PVQCK--HRACT-KE--DQ---CCHQCLGGC--LKP |
| Zootermopsis_nevadensis       | AEGCNKTMCGWGS-----THNCH--HRRRL-QS-----EHELCLGGC--SGP          |
| Parasteatoda_tepidariorum     | STEKPTYLWCWNSQKQKIS-PCIKKECDLQNSSCY-NS--TH---CCHPECLGGC--TGP  |
| Onthophagus_nigritiventris    | NGKPLCEYCWSSKHCQKVC----KSNCT----SCN-DL--GE---CCNNTCIGGC--SNN  |
| Nicrophorus_vespilloides      | KNIGMIFLWCWNRVHCQKVC----PSSCK---TTCD-AK--GK---CCHPSCLGGC--RED |
| Tribolium_castaneum           | NFDRDVLHCWNRQHCQKIC----PTKCK--H--SCN-AN--LE---CCDESLGGC--SIN  |
| Nilaparvata_lugens            | -SATNDNLWCWNIQHCQKFC----SKCEE-GTACM-DD--GT---CCDKNCLGGC--NGT  |
| Blattella_germanica           | NASSTKPLCWNLTCKQKIC----PTECG--SRST-DS--GM---CCHCLCLGGC--TGP   |
| Nasonia_vitripennis_X1        | PTNLDERLWCWNRQHCQKVC----DRKCE--NNACD-IA--GK---CCHPSCLGGC--TGP |
| Microplitis_demolitor         | LTKLDNLWCWNRQHCQKIC----KCG--NGACN-PS--GE---CCNPLCLGGC--TGQ    |
| Neodiprion_lecontei           | STKKDETLCWNRQHCQKVC----DKSCG--ISACN-NSMPGK---CCHSSCLGGC--TGT  |
| Athalia_rosae                 | VTQDETLCWNRQHCQKVC----NTNCG--DAACS-NTVPVK---CCHPTCLGGC--TGP   |
| Orussus_abietinus             | LTKPDETLCWNRQHCQKIC----DRKCG--DKVCS-KT--NE---CCHPSCLGGC--TGP  |
| Dufourea_novaeangliae         | SPKSQETLCWNRQHCQKIC----ERKCE--NNACD-IA--GK---CCHPSCLGGC--TGP  |
| Megachile_rotundata_X1        | STNPDEFWCWNRQHCQKIC----DGKCE--NNACD-DT--GK---CCHKSLGGC--TGP   |
| Melipona_quadrfasciata        | QTKSDEYLCWNRQHCQKIC----DQKCE--SDACD-EF--GG---CCHPSCLGGC--TGP  |
| Apis_mellifera_X1             | LTKQDEYLCWNRQHCQKIC----DRKCE--NNACD-EA--GN---CCHSSCLGGC--SGP  |
| Eufriesea_mexicana_1          | STKSDEYLCWNRQHCQKIC----DRKCE--NNACY-ESELER---CCHPSCLGGC--TGP  |
| Eufriesea_mexicana_2          | STKSDEYLCWNRQHCQKIC----DRKCE--NNACY-ESELER---CCHPSCLGGC--TGP  |
| Bombus_terrestris             | QTKSDEYLCWNRQHCQKIC----DRKCE--NNACD-ES--GT---CCHPSCLGGC--TGP  |
| Bombus_impatiens              | QTKSDEYLCWNRQHCQKIC----DRKCE--NNACD-ES--GT---CCHPSCLGGC--TGP  |
| Polistes_dominula_X1          | SNKPDETLCWNRQHCQKIC----D-RCL--EGACD-AS--GT---CCHPSCLGGC--TGR  |
| Cephus_cinctus_X1             | LTKPDETLCWNRQHCQKIC----DSKCG--DYACS-DS--GT---CCHPSCLGGC--TGL  |
| Dinoponera_quadricaps_X2      | QTKLGETMCWNRQHCQKIC----D-KCG--DGACD-NT--GA---CCHPSCLGGC--NGP  |
| Harpegnathos_saltator_X1      | QTKPDETMCWNRQHCQKIC----D-KCG--DNACD-DT--GA---CCHSSCLGGC--TGP  |
| Linepithema_humile_X2         | QTKRDETLCWNRQHCQKIC----DPKCG--DGACD-DT--GA---CCHPSCLGGC--TGP  |
| Linepithema_humile_X1         | QTKRDETLCWNRQHCQKIC----DPKCG--DGACD-DT--GA---CCHSSCLGGC--TGP  |
| Ooceraea_biroi                | QTKPDETLCWNRQHCQKIC----DRKCE--DCACD-DG--GR---NCHRSCLGGC--TGL  |

|                              |                                                                |
|------------------------------|----------------------------------------------------------------|
| Camponotus_floridanus        | QTKPDETLCWNRQHCQRVC----                                        |
| Solenopsis_invicta           | QTKPDQNLWCWNQHCQRIC----DRKCE--DRACN-ST--GQ---CCHPFCLGGC--TGP   |
| Pogonomyrmex_barbatus_X1     | QMKHDQTLWCWNRHHQCRIC----Q-DCG--DRACN-DK--GE---CCHPSCLGGC--TGS  |
| Vollenhovia_emeryi_X1        | QTKPDQTLWCWNSHNCQQIC----DRTCE--NRACN-KT--GE---CCHQSCCLGGC--TGS |
| Wasmannia_auropunctata       | QTKPDQTLWCWNRTHCQQIC----Q-KCE--DGACN-NK--GE---CCHASCLGGC--TEV  |
| Cyphomyrmex_costatus         | QTKPDQTLWCWNRQHCQQIC----NWKCE--NRGCS-NT--GE---CCHPFCLGGC--TGP  |
| Trachymyrmex_septentrionalis | QTKPDQSLCWNRQHCQQIC----DWKCD--NRACN-ST--GE---CCHPFCLGGC--TGP   |
| Atta_colombica               | QTKFDQSLCWNRQHCQQIC----DWKCE--NRACN-ST--GE---CCHPFCLGGC--TGP   |
| Trachymyrmex_cornetzi        | QTKPDQTLWCWNRQHCQQIC----DWKCE--NRACN-ST--GE---CCHPFCLGGC--TGS  |
| Acromyrmex_echinatior        | QTKLDQSLCWNRQYQCQIC----DWKCE--NRACN-ST--GV---CCHPFCLGGC--SGL   |
| Atta_cephalotes              | QTKFDQSLCWNRQHCQQIC----DWKCE--NRACN-ST--GE---CCHPFCLGGC--TGP   |

\*\*

\* \* : \* \*

|                               |                                                                |
|-------------------------------|----------------------------------------------------------------|
| Drosophila_melanogaster       | -GNESCISCRNVSF-----NNICMDSCPKGYQF-DSRCVTANECITLTKF-----ET      |
| Halyomorpha_halys             | -SPKECTACKNFH-----GNKCVSSCPFFTYEFETKRCVTKDECLAMNNTLLRPGK-TE    |
| Rhodnius_prolixus             | -GPNYCKACRRFDH-----DGGCMKSCSPNRYAFENHYCVTEEEECQD-----DV        |
| Cimex_lectularius_X1          | -GPSNCVSCRHLFYF-----RGKCVPECPPDGYYSFNSRHCISKEDCINSSSTYHKMRR-ND |
| C_lectularius_X2              | -GPSNCVSCRHLFYF-----RGKCVPECPPDGYYSFNSRHCISKEDCINSSSTYHKMRR-ND |
| Cryptotermes_secundus         | -GSDQCSACTSVVD----EHGVCVDSCTDRFEFVGRCVTEEECRNSTVPPPPYLQRLD     |
| Miniopterus_natalensis        | NDPTKCAACRHFYL-----DGRCVETCPPYYHFQDWRCVNFSCQDLHNCKNSRR---      |
| Callithrix_jacchus            | GDPTKCVACRNYL-----DGRCVDSCTPPYYQFQDWRCVNFSCQDLHYCKNSQR---      |
| Heterocephalus_glaber_X1      | DDPTKCVACRNFYL-----DGRCVASCTPPYYHFQDWRCVNFSCQDLHNCKNSRR---     |
| Dasypus_novemcinctus          | DDPTKCMACRNFYL-----DGRCVETCPPYYQFQDWRCVNFSCQDLHNCKNSRR---      |
| Tupaia_chinensis_X2           | NDPTKCAACRNFYL-----DGRCVETCPPYYHFQDWRCVNFSCQDLHNCKNSRR---      |
| Homo_sapiens_X1               | DDPTKCVACRNFYL-----DGRCVETCPPYYHFQDWRCVNFSCQDLHCKNSRR---       |
| Pongo_abelii_2                | DDPTKCVACRNFYL-----DGRCVETCPPYYHFQDWRCVNFSCQDLHCKNSRR---       |
| Pan_troglodytes_X2            | DDPTKCVACRNFYL-----DGRCVETCPPYYHFQDWRCVNFSCQDLHCKNSRR---       |
| Boleophthalmus_pectinirostris | NSVHEKCVACRGLQH-----DNCVVERCPENHFTYKGWRCVSFAFCQDLHNCKREKERSK   |
| Larimichthys_crocea_X2        | NSASHCVACRGLQH-----DNCVVERCPENHFTYKGWRCVSFAFCQDLHNCKREKERSK    |
| Larimichthys_crocea           | NSASHCVACRGLQH-----DNCVVERCPENHFTYKGWRCVSFAFCQDLHNCKREKERSK    |
| Lates_calcarifer              | SSAAHCVACRGLQH-----EGNCVERCPENHFTYKGWRCVSFAFCQDLHNGCKREKERSK   |
| Seriola_lalandi_dorsalis      | NSASHCVACRGLQH-----DNCVVERCPENHFTYKGWRCVSFAFCQDLHNCKREKERSK    |
| Seriola_dumerili              | NSASHCVACRGLQH-----EGNCVERCPENHFTYKGWRCVSFAFCQDLHNCKREKERSK    |
| Zootermopsis_nevadensis       | -RADQCYVCRGVNL-----DGNCIQKCPDRDRVSYLGRRCVTEDECRLNHSYMDAWTPEY   |
| Parasteatoda_tepidiorum       | -LSSDCTVCRHVVV-----EGKCMKKCPNNTYEFMNRRCVREDECNFSISHKSSG-GE     |
| Onthophagus_nigriiventris     | -DPKQCVACRNIIFYTEFNKTVCLDCKPEGLFKYLDRCVTEEEECNIPK--IEYT-VS     |
| Nicrophorus_vespilloides      | -NPRVCHVCRNFTM---GEDGTCTSYCPADRYEYLGRRCVTKKEECINTPRP--LRQYNTI  |
| Tribolium_castaneum           | -DTKLCTVCKNLSM-GFAGKQCMSSCPDYYQYLERRCILKNECKDMKRP--LNFQQQG     |
| Nilaparvata_lugens            | -GPTNCIACRGYLF-----QGTCVATCPVQTYQYLQRCVLEKECYDMPKP--REIMSEE    |
| Blattella_germanica           | -NSTDCACRDRVVF-----ENRCIKKCPNTHFKYLNRRRCVTEECRNITKP--REAN-YD   |
| Nasonia_vitripennis_X1        | -SNLECKVCRDVVV----NQNECVSSCPNGTYQFFNRRCTITKRECQMMRRP--REAP-AE  |
| Microplitis_demolitor         | -TASDCKICRDLVL----PDNCAKQCPHNMYEFLNRRCIDEHKCRKMRKP--LEAF-GN    |
| Neodiprion_letecontei         | -GSQDCAVCRDVIV----DGNRCANSCPENTYMFNRRCVQENECRKMMPK--REAF-DI    |
| Athalia_rosae                 | -TSQDCVCRDVVV----AGNRCAEKCPENTYEFNRRCVQENECRKMMPK--REAF-DI     |
| Orussus_abietinus             | -DSNSCIACRELVL----PSNVCVPQCPGSGTYEYLNRRCVQADECRMRKP--REAS--M   |
| Dufourea_novaeangliae         | -TSRDCKVCKDVMT----ADRDRCDSNPATLEFMNYRCIEENMCMYMEKP--LEAF-NV    |
| Megachile_rotundata_X1        | -TNRDCAVCKDLVT----GNKECSEHCNPNGTLEFMDYRCIDEDTCLRTRKP--LESA-YN  |
| Melipona_quadrifasciata       | -TNRDCAACKDVIS----LDGQCVDRCPNGTLEFMNHRCIDEEQECRLMKP--REAA--N   |
| Apis_mellifera_X1             | -TNRDCTVCKDVVT----GDSECRERCNPNGSLEFMNHRCIDEARCLQMEKP--KEVL-KN  |
| Eufriesea_mexicana_1          | -TNRDCAVCKDLAT----DGFECEERCNPNGTLEFMNHRCIDERCLRMKP--REVF--Y    |
| Eufriesea_mexicana_2          | -TNRDCAVCKDLAT----DGFECEERCNPNGTLEFMNHRCIDERCLRMKP--REVF--Y    |
| Bombus_terrestris             | -TNRDCVCKDVVT----DNNECREQCPNGTLEFMNHRCINEERCLMQKP--REVF--N     |
| Bombus_impatis                | -TNRDCVCKDVVT----DNNECREQCPNGTLEFMNHRCINEERCLMQKP--REVF--N     |
| Polistes_dominula_X1          | -TANDCKVCKNVLI----GPNQCGERCPEGTYEFMNRRCIGEDECRRMVKP--REAL-SI   |
| Cephus_cinctus_X1             | -TAQNCTVCREMVF----DVNQCVKRCPIGTYEFMNRRCIQENECRTMPKP--KEAL-GT   |
| Dinoponera_quadriceps_X2      | -TARDCKVCKNVVA----NDECMDRCPSDTYEFMNRRCVIEQECRRLLKP--REAL-DS    |
| Harpegnathos_saltator_X1      | -TAKDCKVCRNLLV----NGECVDRCPNGTYEFMNRRCIGIEQECRQMRKP--REAL-DS   |
| Linepithema_humile_X2         | -TVNDICVCRNVVI----NGTECKDRCLNGTYEFMNRRCIGIEQECRRMPKP--REAS-DT  |
| Linepithema_humile_X1         | -TVNDICVCRNVVI----NGTECKDRCLNGTYEFMNRRCIGIEQECRRMPKP--REAS-DT  |
| Ooceraea_biroi                | -TARDICVCKGVII----DGHECKNRCPEGTYEFMNRRCIGIEQECRLMPKP--REAL-DT  |
| Camponotus_floridanus         | -SNANCTVCRNVV----GTECKDSCPNGTYEFMNRRCVIEQECRLMKP--REAL-DS      |
| Solenopsis_invicta            | -TANDCSVCRNVVI----NGKECKDRCPGKYEFMNRRCIEEWECRQMPKSMYKNED-EM    |
| Pogonomyrmex_barbatus_X1      | -TVNDICVCRNIIID----GEQCKDSCPNNTYVFMNRRCFTTKNCFEKKKP--QEAR-DT   |
| Vollenhovia_emeryi_X1         | -TANDCAVCRNVVV----TDKVCADHCPDGMYEFMNRRCIGIEKECRQLMKP--RETS-NM  |
| Wasmannia_auropunctata        | --TNCTVCRNVVLV----DGKCEDRCAPAGKLEFMNRRCIIEQECRLMKP--REAS-DA    |
| Cyphomyrmex_costatus          | -TANDICVCKNVVI----NDRECKDRCPKGKYEFMNRRCIEEQECRLMQKP--REAP-DA   |
| Trachymyrmex_septentrionalis  | -TANDICVCKNVII----NRECKDRCPIGKYEFMNRRCIEEQECRLMQKP--REAP-DA    |
| Atta_colombica                | -TANDCTVCKNVII----NKECKDRCPKGKYEFMNRRCIEEQECRLMQKP--REAP-DA    |
| Trachymyrmex_cornetzi         | -TANDCTVCKNVII----NKECKDRCPKGKYEFMNRRCIEEQECRLMQKP--REAP-DA    |
| Acromyrmex_echinatior         | -TANNCTVCKNVII----NRECKDRCPKGKYEFMNRRCIEEQECRLMQKP--REAP-DA    |
| Atta_cephalotes               | -TANDCTVCKNVII----NKECKDRCPKGKYEFMNRRCIEEQECRLMQKP--REAP-DA    |



\* \* \* \* : \* \*

|                               |                                                             |
|-------------------------------|-------------------------------------------------------------|
| Drosophila_melanogaster       | NSVYS---GIPY-NGQCITHCPTGYQKSENKRM-----CEPCPGGK-CDKEC-       |
| Halyomorpha_halys             | TKEN---WFWV-DSLVCNSCPRGLERD-KQLG-----CKKC-PGR-CVLHC-        |
| Rhodnius_prolixus             | VWSKPQE-WFWV-NGTCIQDCPTGLEKT-TMSS-----CERCKDGK-CKKEC-       |
| Cimex_lectularius_X1          | GAHLV---WFIW-GNSCVTECPKFEKTPDGKS-----CQRC-SGM-CKKVC-        |
| C._lectularius_X2             | GAHLV---WFIW-GNSCVTECPKFEKTPDGKS-----CQRC-SGM-CKKVC-        |
| Cryptotermes_secundus         | RAGLPNKAWIPF-NGTCSLTCPPQGYQTYTDSGG--KQL-----CEAC-VDH-CRKIC- |
| Miniopterus_natalensis        | -PGCHQ---YVIH-NNKCIPECPSGY-TM-NSSN---LM-----CTPC-LGP-CPKVCH |
| Callithrix_jacchus            | QSCYQ---YVIH-NNKCLPECPSGY-TM-NSSN---LM-----CTPC-LGP-CPKVCH  |
| Heterocephalus_glaber_X1      | -QGCHQ---YVIH-NDRCIPECPSGY-TM-NSSN---LM-----CTPC-LGP-CPKVCH |
| Dasypus_novemcinctus          | -QGCHQ---YVIH-NNKCIPECPSGY-TM-NSSN---LM-----CTPC-LGP-CPKVCH |
| Tupaia_chinensis_X2           | -QGCHQ---YVIH-NNKCIPECPSGY-TM-NSSN---LM-----CTPC-LGP-CPKVCH |
| Homo_sapiens_X1               | -QGCHQ---YVIH-NNKCIPECPSGY-TM-NSSN---LL-----CTPC-LGP-CPKVCH |
| Pongo_abelii_2                | -QGCHQ---YVIH-NNKCIPECPSGY-TM-NSSN---LL-----CTPC-LGP-CPKVCH |
| Pan_troglodytes_X2            | -QGCHQ---YVIH-NNKCIPECPSGY-TM-NSSN---LL-----CTPC-LGP-CPKVCH |
| Boleophthalmus_pectinirostris | NIDCHE---YVIH-NGACIPECPSGYTTV-NSFA---LM-----CTLG-TGL-CPKIC- |
| Larimichthys_crocea_X2        | SPDCHE---YVIH-NGACIQECPSGYTTV-NSSS---LN-----CTPC-AGL-CPKVC- |
| Larimichthys_crocea           | SPDCHE---YVIH-NGACIQECPSGYTTV-NSSS---LN-----CTPC-AGL-CPKVC- |
| Lates_calcarifer              | SPDCHE---YVIH-NGACIQECPSGYTTV-NSSS---LN-----CTPC-AGL-CPKVC- |
| Seriola_lalandi_dorsalis      | NPDCHE---YVIH-NGACISECPSGYTTV-NSSS---LN-----CTPC-AGL-CPKVC- |
| Seriola_dumerili              | NPDCHE---YVIH-NGACISECPSGYTTV-NSSS---LN-----CTPC-AGL-CPKVC- |
| Zootermopsis_nevadensis       | GRRC---W-PF-NGSCVDKCPPGYEE--QSNGTITVG-----CQPC-QGR-CSHEC-   |
| Parasteatoda_tepidariorum     | YPKVPDVYKPF-NSQCITECPSGYIVD-DNNP---HV-----CQPC-RAK-CPKVC-   |
| Onthophagus_nigriventris      | KQEYE---FKTFNNTSCVYKCPKPYTDDPKKKA-----CVSC-DSR-CKKVC-       |
| Nicrophorus_vespilloides      | PQEYP---YKTL-NKSCILLECPSDYTYENYDQHK-----CFPC-LGR-CKKEC-     |
| Tribolium_castaneum           | GPEKP---FKIF-NNSCILECPNYSN-DTH-----CIPC-QGN-CIKKC-          |
| Nilaparvata_lugens            | VRPQP---WKPF-MNQCLIDCPNYAEA-PIDNFRGLDPDRTYRCEPC-KGP-CKKEC-  |
| Blattella_germanica           | MRMKP---YKPF-NDSCVLECPPGYVET-EFEH-NRYN-----CTPC-KGP-CRKEC-  |
| Nasonia_vitripennis_X1        | TRAYP---FKPF-NNECIMDCPAGYEEV-AEKD--MWS-----CKKC-TGP-CLREC-  |
| Microplitis_demolitor         | VREFF---YKPF-NNSCVIECPAGYMDD-ENNG--KAS-----CKKC-DGA-CSKVC-  |
| Neodiprion_lecontei           | VKEHP---YKPF-NTCTVIECPPGYMDE-EVNG--KAT-----CKKC-DGL-CLKEC-  |
| Athalia_rosae                 | VKEFF---YKPF-NTCTVIECPAGYMDE-EIDG--KSS-----CKKC-DGL-CLKEC-  |
| Orussus_abietinus             | VKEFF---YKPF-NTCTVIECPAGYMDD-GVDA--RAS-----CKKC-DGP-CLKCC-  |
| Dufourea_novaeangliae         | KKSLP---YKPF-NGSCVIECPDYIEE-ELNG--RLL-----CKKC-EGP-CQKCC-   |
| Megachile_rotundata_X1        | IKNYP---YKPF-NTCTVIECPPGYMDE-ETNG--KGS-----CKKC-DGP-CLKEC-  |
| Melipona_quadrfasciata        | GKNYS---YKPF-NGSCVLECPPGYTDE-ESSN--KAS-----CKKC-EGP-CQKEC-  |
| Apis_mellifera_X1             | VKNYP---YKPF-NGSCVIECPPGYMDD-ESNG--RVS-----CKKC-EGS-CQKEC-  |
| Eufriesea_mexicana_1          | VSNYP---HKPF-NGSCIMECPPGYMDE-ESNG--KIS-----CKKC-EGR-CQKEC-  |
| Eufriesea_mexicana_2          | VSNYP---HKPF-NGSCIMECPPGYMDE-ESNG--KIS-----CKKC-EGR-CQKEC-  |
| Bombus_terrestris             | VKNYP---YKSF-NGSCVIECPPGYMDE-ESNG--KVS-----CKKC-EGP-CQKEC-  |
| Bombus_impatiens              | VKNYP---YKSF-NGSCVIECPPGYMDE-ESNG--KVS-----CKKC-EGP-CQKEC-  |
| Polistes_dominula_X1          | VKDYP---YKPF-NGSCVIECPAGYMDE-EVNN--KTS-----CRKC-KGP-CLKEC-  |
| Cephus_cinctus_X1             | VKNYP---YKPF-NGSCVIECPAGYMDE-EVNG--KPS-----CKKC-DGP-CLKEC-  |
| Dinoponera_quadriceps_X2      | VPNYP---YKPF-NGSCVIECPPGYMDV-EVDK--KMF-----CKKC-EGP-CLKEC-  |
| Harpegnathos_saltator_X1      | MQNYP---YKPF-NGSCVIECPAGYMDY-EVGK--NVS-----CKKC-EGP-CLKEC-  |
| Linepithema_humile_X2         | VKKYP---YKLF-NTCTVIECPAGYMET-EGND--PS-----CRKC-NGQ-CLKEC-   |
| Linepithema_humile_X1         | VKKYP---YKLF-NTCTVIECPAGYMET-EGND--PS-----CRKC-NGQ-CLKEC-   |
| Ooceraea_biroi                | VKDYP---YKPF-NGSCVIECPAGYMES-DDYS---VS-----CRQC-EGP-CLKEC-  |
| Camponotus_floridanus         | VKYHP---YKPF-NGTCVIECPAGYMESTDNDQ--NLT-----CRKC-EGS-CLKEC-  |
| Solenopsis_invicta            | IKQHP---YKPF-NDSCVIECPAGYMES-EDHG--NVS-----CQKC-EGRQCLREC-  |
| Pogonomyrmex_barbatus_X1      | VKLYP---YKLF-NDSCVIECPAGYMEN-ETTR---T-----CQKC-NGQWCMKEC-   |
| Vollenhovia_emeryi_X1         | VKMRP---YKPF-NGSCVLECPAGYMES-EERG--SVS-----CQKC-EGRWCLKEC-  |
| Wasmannia_auropunctata        | VKNYP---YKPF-NTSCVIECPPGYMES-ARGD-----CEQC-KGRWCLKEC-       |
| Cyphomyrmex_costatus          | MKSRP---YKLF-NGTCVTECPPGYMES-DNER-EHAS-----CRKC-EGRWCLKEC-  |
| Trachymyrmex_septentrionalis  | MKSRP---YKPF-NGTCVIECPPGYMES-EEKKGKPPPT-----CQKC-EGPCLKEC-  |
| Atta_colombica                | MKSRP---YKPF-NGTCVIECPPGYMES-EEKKGKPPPT-----CQKC-EGPCLKEC-  |
| Trachymyrmex_cornetzi         | MKSRP---YKPF-NGTCVIECPPGYMES-EEKKGKPPPT-----CQKC-EGPCLKEC-  |
| Acromyrmex_echinatior         | MKSRP---YKPF-NGTCVIECPPGYMES-EEKKGKPPPT-----CQKC-EGPCLKEC-  |
| Atta_cephalotes               | MKSRP---YKPF-NGTCVIECPPGYMES-EEKKGKPPPT-----CQKC-EGPCLKEC-  |

\* \* \* \* \*

|                          |                                                               |
|--------------------------|---------------------------------------------------------------|
| Drosophila_melanogaster  | --SSGL---IDSLERAREFHGCTIITGTEPLTISIKRESGAHVM-DELKYGLAAVHKIQS  |
| Halyomorpha_halys        | --KGAN---VESIQSAQQLRYCTHIEGPLVIQL---RSGNQSFQKELEENLGHIEEIMG   |
| Rhodnius_prolixus        | --YGSV---VDSLEKAERLRKCTHILGSLEIQI---KSGQQSVVAELEDLSLGMIEEIQG  |
| Cimex_lectularius_X1     | --SMGN---VDSIQAAQNLRDCTHIDGNLEIHI---GTGKPEVVAKELEENLGMIEEIEG  |
| C._lectularius_X2        | --SMGN---VDSIQAAQNLRDCTHIDGNLEIHI---GTGKPEVVAKELEENLGMIEEIEG  |
| Cryptotermes_secundus    | --GNATRIPVENIYDIQSLNGCTYVNGSLAIHL---M---GNKVV-EELENNFDAIEEISG |
| Miniopterus_natalensis   | LLEGEK---TIDSVTSAQELRGCTVINGSLIINI---R-GGNNLA-AELEANLGLIEEISG |
| Callithrix_jacchus       | LLDREK---IIDSVTSAQDLRGCTVINGSLIINI---R-GGNNLA-AELEANLGLIEEISG |
| Heterocephalus_glaber_X1 | LLEGEK---TIDSVTSAQELRGCTVINGSLIINI---R-GGNNLA-AELEANLGLIEEISG |

|                               |                                                               |
|-------------------------------|---------------------------------------------------------------|
| Dasytus novemcinctus          | LMEGEK--TIDSVTSAQELRGCTVVNGSLIINI---R-GGNNLA-AELEANLGLIEEISG  |
| Tupaia chinensis_X2           | LLEGEK--TIDSVTSAQELRGCTVVNGSLIINI---R-GGNNLA-AELEANLGLIEEISG  |
| Homo sapiens_X1               | LLEGEK--TIDSVTSAQELRGCTVINGSLIINI---R-GGNNLA-AELEANLGLIEEISG  |
| Pongo abelii_2                | LLEGEK--TIDSVTSAQELRGCTVINGSLIINI---R-GGNNLA-AELEANLGLIEEISG  |
| Pan troglodytes_X2            | LLEGEK--TIDSVTSAQELRGCTVINGSLIINI---R-GGNNLA-AELEANLGLIEEISG  |
| Boleophthalmus pectinirostris | --MGQK--TIDSVTAAQALRGCTILNGSLIKL---R-GGNNIA-AEELASLGQLEEITG   |
| Larimichthys crocea_X2        | --MGLK--TVDSVTAAQALRGCTVLNGSLVINL---R-GGNNIA-AEELASLGQLEEITG  |
| Larimichthys crocea           | --MGLK--TVDSVTAAQALRGCTVLNGSLVINL---R-GGNNIA-AEELASLGQLEEITG  |
| Lates calcarifer              | --MGLK--TVDSVTAAQALRGCTVLNGSLVINL---R-GGNNIA-AEELASLGQLEEITG  |
| Seriola lalandi dorsalis      | --MGLK--TVDSVTAAQALRGCTVLNGSLVINL---R-GGNNIA-AEELASLGQLEEITG  |
| Seriola dumerili              | --MGLK--TVDSVTAAQALRGCTVLNGSLVINL---R-GGNNIA-AEELASLGQLEEITG  |
| Zootermopsis nevadensis       | --VGGF---VSSIEDAQKLRGCTTILGSLEIFI---RGYGNHIV-RELEENLAAIEEIQG  |
| Parasteatoda tepidarium       | --APMT---VDHVGAQNYKGCTRINGSLEIHI---Q-GGSNVI-KELEENLNMVEQIDG   |
| Onthophagus nigroventris      | --PGIS---VNNIETAESLKECTHITGSIEIEV-----SGKNIV-PALNANLNMIEEIDG  |
| Nicrophorus vespilloides      | --QGMV---IDSVVTAQRKRGCTHINGSLEIQI---RSGGRSVV-SELEENLSMIEEIDG  |
| Tribolium castaneum           | --AGVN---VDSINLARQLKGCCTHITSLEIQI---R-GGRNVV-NELEESLGMIEEIDG  |
| Nilaparvata lugens            | --EGLN---VDSISSQRLRGCTYIKGSLEIQI---R-GGYNVV-KELEENLNMIEEING   |
| Blattella germanica           | --PGVN---VDSIAAQKMRGCTYIRGSLEIQI---R-GGKNVV-KELEENLNMLEEIEG   |
| Nasonia vitripennis_X1        | --TGIV---VDSIATAQKLRGCSHIKNLEIAV---R-EGQNV-HELEESLSNIEVITG    |
| Microplitis croceipes         | --SGAS---VDSIASAQKLRGCTRIEGSLEIQI---K-GGKNV-KELEENLNMIEEIDG   |
| Neodiprion lecontei           | --SGTN---VDSIASAQKLRGCTHITGSLEIQI---R-GGKNIV-KELEDSLSMIEEIDG  |
| Athalia rosae                 | --SGAN---VDSIASAQKLRGCTTRIMGSLEIQI---R-GGKNIV-KELEDSLSMIEEIDG |
| Orussus abietinus             | --AGTS---VDSIASAQKLRGCTHIVGSLEIQI---R-GGKNIV-KELEDSLSMIEEIDG  |
| Dufourea novaeangliae         | --TGAN---VDSIASAQKLRGCTTRITGSLEIQI---R-GGKNIV-KELEDSLSMIEEIDG |
| Megachile rotundata_X1        | --AGDF---VDSIATAQKLRGCTTRITGSLEIQI---R-GGKNIV-KELEDSLSMIEEIDG |
| Melipona quadrifasciata       | --TGMN---VDSIATAQKLRGCTHIVGSLEIQI---R-GGKNIV-KELEESLSMIQVIDG  |
| Apis mellifera_X1             | --AGAN---VDSIASAQKLRGCTHITGSLEIQI---R-GGKNIV-KELEDGLSTIEEIDG  |
| Eufriesea mexicana_1          | --AGTN---VDSIASAQKLRGCTHITGSLEIQI---R-GGKNIV-KELEDSLSMIEEIDG  |
| Eufriesea mexicana_2          | --AGTN---VDSIASAQKLRGCTHITGSLEIQI---R-GGKNIV-KELEDSLSAIEEIDG  |
| Bombus terrestris             | --AGAN---VDSIASAQKLRGCTHITGSLEIQI---R-GGKNIV-KELEDSLSMIEEIDG  |
| Bombus impatiens              | --AGAN---VDSIASAQKLRGCTHITGSLEIQI---R-GGKNIV-KELEDSLSMIEEIDG  |
| Polistes dominula_X1          | --RGTS---VDSIASAQKLRGCTHITGSLEIQI---R-GGKNIV-KELEDSLSMIEEIDG  |
| Cephus cinctus_X1             | --AGAS---VDSIASAQKLRGCTHITGSLEIQI---R-GGKNIV-KEFEDSLSMIEEIDG  |
| Dinoponera quadricaps_X2      | --FATN---VDSIASAQKLRGCTHIKGSLEIQI---R-GGKNIV-KELEESLSMIEEIDG  |
| Harpegnathos saltator_X1      | --PATN---VDSIASAQKLRGCTHIKGSLEIQI---R-GGKNIV-KELEESLSMIEEIDG  |
| Linepithema humile_X2         | --PGSN---VDSIASAQKLRGCTHIQGSLEIQI---R-GGKNIV-KELEDSLSMIEEIDG  |
| Linepithema humile_X1         | --PGSN---VDSIASAQKLRGCTHIQGSLEIQI---R-GGKNIV-KELEDSLSMIEEIDG  |
| Ooceraea biroi                | --AGTN---VDSIASAQKLRGCTRISGSLEIQI---R-GGKNIV-KELEDSLSMIEEIDG  |
| Camponotus floridanus         | --TGAN---VDSIASAQKLRGCTHIAGSLEIQI---R-GGKNIV-KELEDNLSTIEEIDG  |
| Solenopsis invicta            | --SAAK---VMSIETAQKLRGCTHITGSLEIEI---R-GGKNIV-KELEDNLSTIEEIDG  |
| Pogonomyrmex barbatus_X1      | --SAAN---VDSIASAQKLRGCTNIAGSLEIQI---R-GGKNIV-KELEDNLSTIEEIDG  |
| Vollenhovia emeryi_X1         | --SGSN---VDSIASAQKLRGCTHIAGSLEIQI---R-SGKNIV-KELEENLNMIEEIDG  |
| Wasmannia auropunctata        | --EGAN---VESIASAQKLRGCTHIKGSLEIQI---R-GGKNIV-KELEDSLSMIEEIDG  |
| Cyphomyrmex costatus          | --NGAN---VDSIASAQKLRGCTHIAGSLEIQI---R-GGKNIV-KELEDSLSMIEEIDG  |
| Trachymyrmex septentrionalis  | --AGAN---VDSIASAQKLRGCTHIAGSLEIQI---R-GGKNIV-KELEDSLSMIEEIDG  |
| Atta colombica                | --AGAN---VDSIASAQKLRGCTHIAGSLEIQI---R-GGKNIV-KELEDSLSMIEEIDG  |
| Trachymyrmex cornetzi         | --AGAN---VDSIASAQKLRGCTHIAGSLEIQI---R-GGKNIV-KELEDSLSMIEEIDG  |
| Acromyrmex echinator          | --AGAN---VDSIASAQKLRGCTHIAGSLEIQI---R-GGKNIV-KELEDSLSMIEEIDG  |
| Atta cephalotes               | --AGAN---VDSIASAQKLRGCTHIAGSLEIQI---R-GGKNIV-KELEDSLSMIEEIDG  |

: : . \*: : . : : . :: : : \*

|                               |                                                               |
|-------------------------------|---------------------------------------------------------------|
| Drosophila melanogaster       | SLMVHLTYGLKSLKFFQSLTEISG----DPPMDAD--KYALYVLDNRDLDELWGPNT--   |
| Halyomorpha halys             | YLKIVRSFPLANLNLMLNLRVHIG-----SKLFSDPMLNLSFIMLENQNLQTIWDWDRPA  |
| Rhodnius prolixus             | QLKITRSFPLVSLDFFKLNRIIQG---DRHFYFNS--NYSLFIKDNQNLMTIWNWDKRPA  |
| Cimex lectularius_X1          | NLRIIHSFPLDSLGGFFKLNKVIHGYKDKKGTNNLV--NHSFLVLDNQNKLKEIWNWDRPA |
| C. lectularius_X2             | NLRIIHSFPLDSLGGFFKLNKVIHGYKDKKGTNNLV--NHSFLVLDNQNKLKEIWNWDRPA |
| Cryptotermes secundus         | YLKISHSYPLVTLNFFKLNKVIHIG-----LRLESD--KFALVIVGNDNLQELWNWEARP  |
| Miniopterus natalensis        | YLKIRRSYALVLSFFFRKLRLIQG-----DTLEIG--NYSFYALDNQNLRLQWDSKHK--  |
| Callithrix jacchus            | YLKIRRSYALVLSAFFRKLRLIRG-----ETLEAG--NYSFYALDNQNLRLQWDSKHK--  |
| Heterocephalus glaber_X1      | YLKIRRSYALVLSFFFRKLRLIRG-----ETLEIG--NYSFYALDNQNLRLQWDSKHK--  |
| Dasytus novemcinctus          | YLKIRRSYALVLSFFFRKLRLVIRG-----ETLEVG--NYSFYALDNQNLRLQWDSKHK-- |
| Tupaia chinensis_X2           | YLKIRRSYALVLSFFFRKLRLVIRG-----ETLEIG--NYSFYALDNQNLRLQWDSKHK-- |
| Homo sapiens_X1               | YLKIRRSYALVLSFFFRKLRLIRG-----ETLEIG--NYSFYALDNQNLRLQWDSKHK--  |
| Pongo abelii_2                | YLKIRRSYALVLSFFFRKLRLIRG-----ETLEIG--NYSFYALDNQNLRLQWDSKHK--  |
| Pan troglodytes_X2            | YLKIRRSYALVLSFFFRKLRLIRG-----ETLEIG--NYSFYALDNQNLRLQWDSKHK--  |
| Boleophthalmus pectinirostris | FLAVQRSYALVLSFFFRKLRLVIRG-----EELYNG--NYSFYALDNQNLRLQWDSKHK-- |
| Larimichthys crocea_X2        | YLTVRRSYALVLSFFFRKLRLVIRG-----EEQEIG--NYSFYALDNQNLRLQWDSKHK-- |
| Larimichthys crocea           | YLTVRRSYALVLSFFFRKLRLVIRG-----EEQEIG--NYSFYALDNQNLRLQWDSKHK-- |
| Lates calcarifer              | YLTVRRSYALVLSFFFRKLRLVIRG-----EEQEIG--NYSFYALDNQNLRLQWDSKHK-- |
| Seriola lalandi dorsalis      | YLTVRRSYALVLSFFFRKLRLVIRG-----EEQEIG--NYSFYALDNQNLRLQWDSKHK-- |
| Seriola dumerili              | YLTVRRSYALVLSFFFRKLRLVIRG-----EEQEIG--NYSFYALDNQNLRLQWDSKHK-- |



|                              |                                                                |
|------------------------------|----------------------------------------------------------------|
| Zootermopsis nevadensis      | YLKVSRSFPLTSLNFKNLRIIHG-----NKLEDN--WYSLVVLNQNQLQELWDWSSRPQ    |
| Parasteatoda tepidariorum    | YLKIARSFPLVSLNFKLSLTVIKG-----DTLDKK--DYSLLVLDNQNQLQELWDWKLRT-  |
| Onthophagus nigriventris     | YLKIVRSYPLISLSFFKSLKVIHG-----NAFENG--KYSFVLVDNQNQLQFNWDWENRT-  |
| Nicrophorus vespilloides     | YIKVVRSFPLVSLNFFKNLKVIRG-----NSLEFK--KYVVIVSDNQNQLQDLWDFENRT-  |
| Tribolium castaneum          | YLKVVRSFPLVSLNFKNLKVIHG-----RQLESQ--KYVFFVLVDNQNQLQELWNWENNK-  |
| Nilaparvata lugens           | YLKIVRSFPLVSLNFKLKLKVIHG-----EKLESG--KYALVVLVDNQNQLVELWDFGSPR- |
| Blattella germanica          | YLKIVRSFPLISLNFRLKRLRVHG-----KKLDSN--KYAFVLVDNQNQLQELWDWDTRP-  |
| Nasonia vitripennis_X1       | YLKIFRSFPLISLSFLKNLVEIKG-----ETLDMK--DYSLVLDNQNQLQQLWNWTTTP-   |
| Microplitis demolitor        | YLKIVRSFPLISLNFKNLKLING-----SQLEND--KYTLAVLDNQNQLQELWDWDTHP-   |
| Neodiprion lecontei          | YLKIVRSFPLISLNFKNLHTIHG-----KELESG--KYTFVVLVDNQNQLQELWDMESHK-  |
| Athalia rosae                | YLKIVRSFPLISLNFKNLRTIHG-----KTLESG--KYSLVLDNQNQLQELWDLETHK-    |
| Orussus abietinus            | YLKIVRCFPLISLNFKNLKIIRG-----NSLDNS--KYTLAVLDNQNQLQELWDWSSK-    |
| Dufourea novaeangliae        | NLKIVRSFPLISLNFKNLRLIRG-----NDVENS--KYSLLVMDNQNQLQELWDWSWHR-   |
| Megachile rotundata_X1       | YLKIVRSFPLISLNFKNLRLVIRG-----NEINNS--KYSLLVMDNQNQLQELWDWSWHR-  |
| Melipona quadrifasciata      | YLKIVRSFPLISLSFLKNLRAIRG-----NDIDNS--KYSLLVMDNQNQLQELWDWDTHD-  |
| Apis mellifera_X1            | YLKIVRSFPLISLNFKNLRLVIRG-----NDIDNS--KYTLVMDNQNQLQELWDWSLHK-   |
| Eufriesea mexicana_1         | YLKIVRSFPLISLNFKNLRIIRG-----NDIDNS--KYSLLVMDNQNQLQELWDWSLHK-   |
| Eufriesea mexicana_2         | YLKIVRSFPLISLNFKNLRIIRG-----NDIDNS--KYSLLVMDNQNQLQELWDWSLHK-   |
| Bombus terrestris            | YLKIVRSFPLISLNFKNLRLVIRG-----NDIDNS--KYSLLVMDNQNQLQELWDWSLHK-  |
| Bombus impatiens             | YLKIVRSFPLISLNFKNLRLVIRG-----NDIDNS--KYSLLVMDNQNQLQELWDWSLHK-  |
| Polistes dominula_X1         | YLKIVRSFPLISLNFKLSLRLVIRG-----NSLDNN--KYTLAVLDNQNQLQELWDWSTHP- |
| Cephus cinctus_X1            | YLKIVRSFPLISLNFKNLRLIKG-----NQLDNG--KYTLAVLDNQNQLQELWDWDTHP-   |
| Dinoponera quadricaps_X2     | YLKIVRSFPLISLNFKLSLRIIRG-----NVLENG--KYTLVFDNQNQLQELWDWSTHK-   |
| Harpegnathos saltator_X1     | YLKIVRSFPLISLNFKNLRLVIRG-----KILDNA--KYTLVFDNQNQLQELWDWSTHK-   |
| Linepithema humile_X2        | YLKIVRSFPLISLNFKNLRLVIRG-----NTLENH--KYSLAVFDNQNQLQELWDWSTHP-  |
| Linepithema humile_X1        | YLKIVRSFPLISLNFKNLRLVIRG-----NTLENH--KYSLAVFDNQNQLQELWDWSTHP-  |
| Ooceraea biroi               | YLKIVRSFPLISLNFKNLRLVIRG-----NELDNG--KYSLAVLDNQNQLQELWDWRTHR-  |
| Camponotus floridanus        | YLKIVRSFPLISLNFKNLRLVIRG-----NTLENN--KYSLAVLDNQNQLQELWDWSTHP-  |
| Solenopsis invicta           | SLRIVRSFPLISLNFKNLRLVIRG-----NDSSES--KYSLSVLDNQNQLQELWDWNTHK-  |
| Pogonomyrmex barbatulus_X1   | YLKIVRSFPLISLNFKNLRLVIRG-----NELENG--KYSLAVFDNQNQLQELWDWNTHS-  |
| Vollenhovia emeryi_X1        | YLKIVRSFPLISLNFKNLRLVIRG-----NQLENG--KYSLAVLDNQNQLQELWDWNTHP-  |
| Wasmannia auropunctata       | YLKIVRSFPLISLNFKNLRLVIRG-----KDLENG--KYSLAVLDNQNQLQELWDWSTHP-  |
| Cyphomyrmex costatus         | YLKIVRSFPLISLNFKNLRLVIRG-----KTLENG--KYSLAVLDNQNQLQELWDWNTHP-  |
| Trachymyrmex septentrionalis | YLKIVRSFPLISLNFKNLRLVIRG-----QTLENG--KYSLAVLDNQNQLQELWDWNTHP-  |
| Atta colombica               | YLKIVRSFPLISLNFKNLRLVIRG-----QTLENG--KYSLAVLDNQNQLQELWDWNTHP-  |
| Trachymyrmex cornetzi        | YLKIVRSFPLISLNFKNLRLVIRG-----QTLENS--KYSLAVLDNQNQLQELWDWNTHP-  |
| Acromyrmex echinator         | YLKIVRSFPLISLNFKNLRLVIRG-----QTLENG--KYSLAVLDNQNQLQELWDWNTHP-  |
| Atta cephalotes              | YLKIVRSFPLISLNFKNLRLVIRG-----QTLENG--KYSLAVLDNQNQLQELWDWNTHP-  |
|                              | : : : * .: *: * : *                                            |

|                               |                                                               |
|-------------------------------|---------------------------------------------------------------|
| Drosophila melanogaster       | ---VFIRK-----GGVFFHFNPCLKVSTINQLLPLASKPKFFFEKSDVGADSNNGNRGSC  |
| Halyomorpha halys             | KRNFTILA-----GRLFFHYNPCLCKHIYELGKI-AGIEKIKNS-EVAKESNGNKFAC    |
| Rhodnius prolixus             | GRNFTINM-----GRPLFNDNPCLKCIKHIRELTTI-AGFKDVKDT-EVT-KQNGVKFAC  |
| Cimex lectularius_X1          | GRNFKILN-----GYPFFHYNPMLCYKHIEELTSI-AGIQDIKTI-EITRESNGGRFAC   |
| C. lectularius_X2             | GRNFKILN-----GYPFFHYNPMLCYKHIEELTSI-AGIQDIKTI-EITRESNGGRFAC   |
| Cryptotermes secundus         | -RNFTIEK-----GTISLHSNPKLCIAEIDELRDI-AGLHNNSAD-EISYESNGNEVTC   |
| Miniopterus natalensis        | --NLTITQ-----GKLFFFHYNPKLCLSEIHKMEEI-SGTKGRQERNDIALKTNGDQASC  |
| Callithrix jacchus            | --NLTITQ-----GKLFFFHYNPKLCLSEIHKMEEI-SGTKGRQERNDIALKTNGDQASC  |
| Heterocephalus glaber_X1      | --NLTITQ-----GKLFFFHYNPKLCLSEIHKMEEV-SGTKGRQERNDIALKTNGDQASC  |
| Dasypus novemcinctus          | --NLTITQ-----GKLFFFHYNPKLCLSEIHKMEEV-SGTKGRQERNDIALKTNGDQASC  |
| Tupaia chinensis_X2           | --NLTITQ-----GKLFFFHYNPKLCLSEIHKMEEV-SGTKGRQERNDIAPKTNGDQASC  |
| Homo sapiens_X1               | --NLTITQ-----GKLFFFHYNPKLCLSEIHKMEEV-SGTKGRQERNDIALKTNGDQASC  |
| Pongo abelii_2                | --NLTITQ-----GKLFFFHYNPKLCLSEIHKMEEV-SGTKGRQERNDIALKTNGDQASC  |
| Pan troglodytes_X2            | --NLTITQ-----GKLFFFHYNPKLCLSEIHKMEEV-SGTKGRQERNDIALKTNGDQASC  |
| Boleophthalmus pectinirostris | ---LTIQK-----GHIVFLYNSKLCISEILRMVEV-TGASIQKE--DIT-KTNGEQASC   |
| Larimichthys crocea_X2        | ---LTIQ-----GRMFFHYNSKLCMSEIRKMEGV-TGTERQVKNDIASKTNGDQASC     |
| Larimichthys crocea           | ---LTIQ-----GRMFFHYNSKLCMSEIRKMEGV-TGTERQVKNDIASKTNGDQASC     |
| Lates calcarifer              | ---LTIQ-----GRMFFHYNSKLCMSEIRKMEEV-TGTERLKVNDIASKTNGDQASC     |
| Seriola lalandi dorsalis      | ---LTIQ-----GRMFFHYNSKLCMSEIRKMEEV-TGTERLKVNDIASKTNGDQASC     |
| Seriola dumerili              | ---LTIQ-----GRMFFHYNSKLCMSEIRKMEEV-TGTERLKVNDIASKTNGDQASC     |
| Zootermopsis nevadensis       | GLQLKIVK-----GHLFFHYNPKLCLMSEIDKLQNI-SGAPNTNF-DVARENSGDKVAC   |
| Parasteatoda tepidariorum     | -NKLKILN-----GKIFFFHNSKLCPSKIQLKTY-AEVADWDER-DVSPSSNGDRVAC    |
| Onthophagus nigriventris      | ---LQINH-----GKLFFFHFNPCLKCYLIKQLAEK-ANITKFDW-DVAENSNGDKTAC   |
| Nicrophorus vespilloides      | ---LKIDH-----GGLFFHFNPKLCLMYKIEALREM-ANLSEFEER-DVASNSNGDRAC   |
| Tribolium castaneum           | --TLKIDT-----GRLFFHFNPKLCLIREIEKLQNI-THIVDTKL-EVAKNSNGDKIAC   |
| Nilaparvata lugens            | EERLRITR-----GKLFFFHFNPKLCLMYKIDNLRKY-LGMPEFTDN-EVARNNSGDKVAC |
| Blattella germanica           | -EKLQILN-----GRLFFHFNPKLCLMYKIEKLQV-ANLPDFTDL-EVAANSNGDKMAC   |
| Nasonia vitripennis_X1        | --PLKIGSSNPV--PKVSFHYNPKLCLQTIIEELRER-TGLNPFEV-EVSPSSNGDKVAC  |
| Microplitis demolitor         | --PITIKSGDGP--AKIFFHFNPKLCLIHNIKLRDV-ANLSQFTDL-EVAPNSNGDKVAC  |
| Neodiprion lecontei           | --SMRILANNGP--VKVFFHFNPKLCLDTIEKFRKG-AGLPEFSDL-EVAPNSNGDKVAC  |
| Athalia rosae                 | --SIKILARDGP--AKVFFHFNPKLCLDTIEKFRKA-ADLPEFTEL-EVAPNSNGDKVAC  |

|                              |                                                                  |
|------------------------------|------------------------------------------------------------------|
| Orussus_abietinus            | --KIKILSKDGP--AKIFFHFNPKLCLCKKIEKLREV--AGLQEFDTL--DVAPNSNGDKVAC  |
| Dufourea_novaeangliae        | --DIKIESKGEPP--GKMFFHMNPKLCLYKIEALRER--AGLKKFTDY--EVAPNSNGDKVAC  |
| Megachile_rotundata_X1       | --DIKILSKDGP--GKIFFHFNPKLCLYKIEMLREK--AGVAPFTDY--EVAPNSNGDKVAC   |
| Melipona_quadrifasciata      | --GIKILSKDGP--GRIFFHFNPKLCLYKIEIETLRKK--AGLGPFTDY--DVAPNSNGDKVAC |
| Apis_mellifera_X1            | --EISIKSKDGP--GKIFFHFNPKLCLYKIEMLREK--AGLGPFTDY--EVAPNSNGDKVAC   |
| Eufriesea_mexicana_1         | --DIKIQSRDGP--GKIFFHFNPKLCLYKIEMLRKK--AGLGPFTDY--EVAPNSNGDKVAC   |
| Eufriesea_mexicana_2         | --DIKIQSRDGP--GKIFFHFNPKLCLYKIEMLRKK--AGLGPFTDY--EVAPNSNGDKVAC   |
| Bombus_terrestris            | --DIKILSKGGI--GKIFFHFNPKLCLYKIEMLREK--AGLRPFTDY--EVAPNSNGDKVAC   |
| Bombus_impatiens             | --DIKILSKGGI--GKIFFHFNPKLCLYKIEMLREK--AGLRPFTDY--EVAPNSNGDKVAC   |
| Polistes_dominula_X1         | --NIAIYSKDGP--AKVFFHFNPKLCFYKIEALRKK--AHLQEFDTL--EVAPNSNGDKVAC   |
| Cephus_cinctus_X1            | --KIQIRSNAGP--GKVFFHFNPKLCLHKKIEKLREV--ANLAEFSPL--EVALNSNGDKVAC  |
| Dinoponera_quadriceps_X2     | --NITILSKEGP--PKVFFHFNPKLCLSKIETLRQK--AKLNAFTDY--DVAPNSNGDKVAC   |
| Harpegnathos_saltator_X1     | --NITILSKEGH--AKIFFHFNPKLCLYKIEKLREV--ANLEYFTDY--DVAPNSNGDKVAC   |
| Linepithema_humile_X2        | --NLITILSPAGP--AKLFFHFNPKLCLQKIEILRDK--AKLEDFNDH--DVASSNGDKVAC   |
| Linepithema_humile_X1        | --NLITILSPAGP--AKLFFHFNPKLCLQKIEILRDK--AKLEDFNDH--DVASSNGDKVAC   |
| Ooceraea_biroi               | --NISIMSKDGP--AKIFFHFNPKLCLYKIEIETLRK--ARLNEFTDL--EVAPNSNGDKVAC  |
| Camponotus_floridanus        | --NLITILSSAGS--PKVFFHFNPKLCMYKIDMLREK--AKLDNFTEH--DVAINSNGDKVAC  |
| Solenopsis_invicta           | --NITILAKTGP--ARLFFHFNPKLCLHEIEKLRLK--ANLEEFTH--DVASNSNGDKIAC    |
| Pogonomyrmex_barbatus_X1     | --NITILAHNGAAKALFFHFNPKLCLHEIEKLREK--AQLDEFTDH--DVASTSNGDKVAC    |
| Vollenhovia_emeryi_X1        | --NITILSSKGP--AKLFFHFNPKLCLHEIEKLREK--ARLEEFTH--DVASSNGDKVAC     |
| Wasmannia_auropunctata       | --NITILSSVGP--AKLFFHFNPKLCLHEIEKLREK--AKLEEFNDH--DVASSNGDKVAC    |
| Cyphomyrmex_costatus         | --NITILSSKGP--AKLFFHFNPKLCLHEIEKLREK--AKLDEFTDL--DVASSNGDKVAC    |
| Trachymyrmex_septentrionalis | --NITILSSGGP--AKLFFHFNPKLCLHEIEKLREK--AKLEEFTH--DVASSNGDKVAC     |
| Atta_colombica               | --NITILSSKGP--AKLFFHFNPKLCLHEIEKLREK--AKLEEFTH--DVASSNGDKVAC     |
| Trachymyrmex_cornetzi        | --NITILSSGGP--AKLFFHFNPKLCLHEIEKLREK--AKLEEFTH--DVASSNGDKVAC     |
| Acromyrmex_echinator         | --NITIMSSGGP--AKLFFHFNPKLCLHEIEKLREK--AKLEEFTH--DVASSNGDKVAC     |
| Atta_cephalotes              | --NITILSSGGP--AKLFFHFNPKLCLHEIEKLREK--AKLEEFTH--DVASSNGDKVAC     |
|                              | . * : * . ** * :                                                 |

|                               |                         |                                |           |
|-------------------------------|-------------------------|--------------------------------|-----------|
| Drosophila_melanogaster       | GTAVLNVTLQS-VGANSAMLNV  | TTKVEIGEPQKPSNATIVFK--DPRA---- | FIGVFVYH  |
| Halyomorpha_halys             | NIIDLNIKVHF-RNSTCITIFI  | -----APPKFR--DAENQENYLLRYLAYY  |           |
| Rhodnius_prolixus             | NLVELNISAHL-TFSQSIVIH   | -----HKPDFN--NT-S----          | LIKYIAYY  |
| Cimex_lectularius_X1          | NKLSLNVTVHL-VYENAIALAI  | -----EQPEFT--NMAK--YYQMMRFVAYY |           |
| C.lectularius_X2              | NKLSLNVTVHL-VYENAIALAI  | -----EQPEFT--NMAK--YYQMMRFVAYY |           |
| Cryptotermes_secundus         | IVIKMNASSVV-INSTSVTIQV  | -----DPFHVP--RGRG---           | TLLGYTVHY |
| Miniopterus_natalensis        | ENELLKFSSYIR-TSFDKILLRW | -----EPYWPP--DFRD----          | LLGFMLFY  |
| Callithrix_jacchus            | ENELIKFSSIR-TSSDKILLKW  | -----EPYWPP--DFRD----          | LLGFMLFY  |
| Heterocephalus_glaber_X1      | ENELLKFSSIR-TSSDKILLRW  | -----EPYWPP--DFRD----          | LLGFMLFY  |
| Dasypus_novemcinctus          | ENELLKFSDIR-TSFDKILLRW  | -----EPYWPP--DFRD----          | LLGFMLFY  |
| Tupaia_chinensis_X2           | ENELLKFSHIR-TSFDKILLKW  | -----EPYWPP--DFRD----          | LLGFMLFY  |
| Homo_sapiens_X1               | ENELLKFSYIR-TSFDKILLRW  | -----EPYWPP--DFRD----          | LLGFMLFY  |
| Pongo_abelii_2                | ENELLKFSYIR-TSFDKILLRW  | -----EPYWPP--DFRD----          | LLGFMLFY  |
| Pan_troglodytes_X2            | ENELLKFSYIR-TSFDKILLRW  | -----EPYWPP--DFRD----          | LLGFMLFY  |
| Boleophthalmus_pectinirostris | ETHSLTFEQIR-TMSDKIMVKW  | -----KAFWPP--DFRD----          | LLGFMLVY  |
| Larimichthys_crocea_X2        | ENHVLKFTMIR-TMSDKIMVKW  | -----EAFWPP--DFRD----          | LLGFMLVY  |
| Larimichthys_crocea           | ENHVLKFTMIR-TMSDKIMVKW  | -----EAFWPP--DFRD----          | LLGFMLVY  |
| Lates_calcarifer              | ENRVLKFTQIR-TMSDKIMVKW  | -----EAFWPP--DFRD----          | LLGFMLVY  |
| Seriola_lalandi_dorsalis      | ENHVLRFQIR-TMSDKIMVKW   | -----EPFWPP--DFRD----          | LLGFMLVY  |
| Seriola_dumerili              | ENHVLRFQIR-TMSDKIMVKW   | -----EPFWPP--DFRD----          | LLGFMLVY  |
| Zootermopsis_nevadensis       | NVNLNVNSTV-TSSTSVLIEW   | -----ERCVLP--DPRS----          | VLGYMVYY  |
| Parasteatoda_tepidarium       | DVTNMNVTVRN-ASPSIVTVKW  | -----DSFGKNLIDDRS----          | LLGYVIYY  |
| Onthophagus_nigriiventris     | EIKDLIIEIQS-KSSTSQVLYW  | -----VPFNIT--DSRK----          | LLSYQIYH  |
| Nicrophorus_vespilloides      | NVQNLVVNVTN-SGPRAIVLAW  | -----APFEMK--DHRA----          | LLGYVVYS  |
| Tribolium_castaneum           | ELQVLKVDKPKVNSKGVVLEW   | -----EPFKID--DPRK----          | LLGYIVYS  |
| Nilaparvata_lugens            | NISLLDARVET-RSSKGVIKW   | -----KEFEHY--DPRT----          | LLGYIIYF  |
| Blattella_germanica           | NVTKLRATVTK-RDHVAVLIEW  | -----QQFEHY--DPRT----          | LLGYVVYY  |
| Nasonia_vitripennis_X1        | NVTEIRTVIFS-ISSKAAMINW  | -----EPFEHH--DMRT----          | LLGYVLYS  |
| Microplitis_demolitor         | NVTELKVQVIK-KTAAEALIEW  | -----KAFEHH--DPRS----          | LLGYVVYF  |
| Neodiprion_lecontei           | NVTKLHTRVQK-KTSNAALIAW  | -----EPFDHH--DQRS----          | LLGYVVYF  |
| Athalia_rosae                 | NVTKLRTRVTK-KTSNAALIEW  | -----EAFRHH--DPRS----          | LLGYVVYF  |
| Orussus_abietinus             | DVELVTRITR-INTAAALIEW   | -----DAFEHH--DPRS----          | LLGYVVYV  |
| Dufourea_novaeangliae         | NVTELKTRVGN-KSPWGAVIEW  | -----EPFIHH--DARS----          | LLSYVVYF  |
| Megachile_rotundata_X1        | NVTELKTRVGK-KSAYGAVIEW  | -----EPFVHH--DVRs----          | LLGYVVYF  |
| Melipona_quadrifasciata       | NVTELMTMVGK-KSPWGAVIEW  | -----EPFVHH--DARS----          | LLGYVVYV  |
| Apis_mellifera_X1             | NVTELKTRVGK-KSPWGAVIEW  | -----EPFVHH--DARS----          | LLGYVVYF  |
| Eufriesea_mexicana_1          | NVTELKTRVGK-KSPWGAVIEW  | -----EPFVHH--DARS----          | LLGYVVYF  |
| Eufriesea_mexicana_2          | NVTELKTRVGK-KSPWGAVIEW  | -----EPFVHH--DARS----          | LLGYVVYF  |
| Bombus_terrestris             | NVTELRTRVGK-KSPWGAVIEW  | -----EPFIHH--DARS----          | LLGYVVYF  |
| Bombus_impatiens              | NVTELRTRVGK-KSPWGAVIEW  | -----EPFIHH--DARS----          | LLGYVVYF  |
| Polistes_dominula_X1          | NVTELKTVVTK-TTSDAALIEW  | -----EQFTHH--DPRS----          | LLGYVVYF  |
| Cephus_cinctus_X1             | NVTDIITRVTK-KTSEALIEW   | -----QAFKHH--DPRS----          | LLGYVVYF  |

|                              |                        |                       |          |
|------------------------------|------------------------|-----------------------|----------|
| Dinoponera_quadriceps_X2     | NVTELQTKVVK-ETSRGAIIEW | -----EAFMHH--DTRS---- | LLGYVVYF |
| Harpegnathos_saltator_X1     | NVTNLYTKVIQ-KTSRGAIIEW | -----EAFMHH--DTRS---- | LLGYVVYF |
| Linepithema_humile_X2        | NVTQLKTKVIK-KTSRGAIIEW | -----EAYTHH--DTRS---- | LLGYVVYF |
| Linepithema_humile_X1        | NVTQLKTKVIK-KTSRGAIIEW | -----EAYTHH--DTRS---- | LLGYVVYF |
| Ooceraea_biroi               | NVTELKTKIIK-KTSRGAIIEW | -----ETFMHH--DTRS---- | LLGYIVYF |
| Camponotus_floridanus        | NVTELKTKITK-KTSRGAIIEW | -----EPFSHH--DYSR---- | LLGYVVYF |
| Solenopsis_invicta           | NVTELETRVTW-RTPVGAIKW  | -----TAFKHH--DIRS---- | LLGYVVYF |
| Pogonomyrmex_barbatus_X1     | NVTELKTKVTK-KTPRGAIIEW | -----RAFTHH--DTRS---- | LLGYVVYF |
| Vollenhovia_emeryi_X1        | NVTELTPKVIK-RSSRAAIIEW | -----NIFTHH--DTRS---- | LLGYVVYF |
| Wasmannia_auropunctata       | NVTELKTRITK-KTSRGVIEIW | -----KGFTHH--DTRS---- | LLGYVVYF |
| Cyphomyrmex_costatus         | NVTELKTKVTR-KSSRGAIIEW | -----EAFTHH--DTRS---- | LLGYVLYF |
| Trachymyrmex_septentrionalis | NVTELKTKVTK-KTSRGAIIEW | -----KAFTHH--DTRS---- | LLGYVVYF |
| Atta_colombica               | NVTELKTKVTK-KSSRGAIIEW | -----KAFTHH--DTRS---- | LLGYVVYF |
| Trachymyrmex_cornetzi        | NVTELKTKVTK-KSSRGAIIEW | -----KAFTHH--DTRS---- | LLGYVVYF |
| Acromyrmex_echinator         | NVTELKTKVTK-KSSRGAIIEW | -----KAFTHH--DTRS---- | LLGYVVYF |
| Atta_cephalotes              | NVTELKTKVTK-KSSRGAIIEW | -----KAFTHH--DTRS---- | LLGYVVYF |

: : : :

|                               |                                                             |             |
|-------------------------------|-------------------------------------------------------------|-------------|
| Drosophila_melanogaster       | MIDPYGNSTK-SSDDPC-DDRWKVS                                   | -----SPEKSG |
| Halyomorpha_halys             | IKAPFRNVTDYBINECSYRWTVDVINYP                                | -----EKNYTK |
| Rhodnius_prolixus             | MEEPYGNLTTAIPSDDCEENAWKLNDVAISEEDK                          | -----SMSNLK |
| Cimex_lectularius_X1          | MEAPHQNVTELTNE-CSESKWKMHDISGLNEPFD                          | -----GGPPNG |
| C.lectularius_X2              | MEAPHQNVTELTNE-CSESKWKMHDISGLNEPFD                          | -----GGPPNG |
| Cryptotermes_secundus         | METAVRNVLTETDNDACGVDKWKVAYVVLTTN                            | -----QSATPT |
| Miniopterus_natalensis        | KEAPYQNVTEFDGQDACGSNSWTVVDDIDPPLRSN                         | -----DPKSQN |
| Callithrix_jacchus            | KEAPYQNVTEFDGQDACGSNSWTVVDDIDPQRS                           | -----DPTSQS |
| Heterocephalus_glaber_X1      | KEAPYQNVTEFDGQDACGSNSWTVVDDIDPPLRSN                         | -----DPKLQN |
| Dasytus_novemcinctus          | KEAPYQNVTEFDGQDACGSNSWTVVDDIDPQRSN                          | -----DPKSQS |
| Tupaia_chinensis_X2           | KEAPYQNVTEFDGQDACGSNSWTVVDDIDPQRSN                          | -----DPKSQN |
| Homo_sapiens_X1               | KEAPYQNVTEFDGQDACGSNSWTVVDDIDPPLRSN                         | -----DPKSQN |
| Pongo_abelii_2                | KEAPYQNVTEFDGQDACGSNSWTVVDDIDPPLRSN                         | -----DPKSQN |
| Pan_troglodytes_X2            | KEAPYQNVTEFDGQDACGSNSWTVVDDIDPPLRSN                         | -----DPKSQN |
| Boleophthalmus_pectinirostris | KEAPFQNVTEFDGQDACGSNSWVIADVEPPPRITD                         | -----SEKEQM |
| Larimichthys_crocea_X2        | KEAPFRNVTEFDGQDACGSNSWVIADVDPPRRSTE                         | -----GDKEQS |
| Larimichthys_crocea           | KEAPFRNVTEFDGQDACGSNSWVIADVDPPRRSTE                         | -----GDKEQS |
| Lates_calcarifer              | KEAPFQNVTEFDGQDACGSNSWVIADVDPPRRATE                         | -----GDKEQF |
| Seriola_lalandi_dorsalis      | KEAPFQNVTEFDGQDACGSNSWVIADVDPPRRASE                         | -----GDKEQF |
| Seriola_dumerili              | KEAPFQNVTEFDGQDACGSNSWVIADVDPPRRASE                         | -----GDKEQF |
| Zootermopsis_nevadensis       | IEAPEQNLTEHDLDACGDCGWHVVDVPYDTDEKNTV                        | -----DTSQYG |
| Parasteatoda_tepidarium       | RETLFRNLSIFEGRDACGTDAWTVRDVEYVENTN                          | -----N      |
| Onthophagus_nigriiventris     | IEAPVQNFSIFDSRDACGGDGWSIQDVPIPY                             | -----DHHNVS |
| Nicrophorus_vespilloides      | IKAPEQNTLYDGRDACGGDGWRVDDIYIDNQKP                           | -----       |
| Tribolium_castaneum           | IEAPTQNVTLYDGRDACGGDGWRVDDVAIPENEM                          | -----       |
| Nilaparvata_lugens            | IEAPYQNVSLYDGRDACGGDGWRVIDVSPLEKDNETTLINE                   | -----DKNKTK |
| Blattella_germanica           | IEAPYQNVTLYDGRDACGGDGWHVTDMPVNQITIT                         | -----       |
| Nasonia_vitripennis_X1        | KEAPFQNVSMYESRDACGGDGWKVVDIGVNEEDKIKMKKIDTISDSNTNNVTNNRSSTY | -----       |
| Microplitis_demolitor         | IEAPNRVTMYDGRDACGGDGWRVDDVASESS                             | -----NESSNL |
| Neodiprion_lecontei           | IEAPN-NVTMYDGRDACGGDGWRVDDVSAEESDRTIHQNG                    | -----TDSBTT |
| Athalia_rosae                 | IEAPN-NVTMFDGRDACGGDGWRVDDVSAVDNPEAPPVLTNGT                 | -----LTESVS |
| Orussus_abietinus             | IEAPTQNVTMYDGRDACGGDGWRVDDVSSSSTSTSNQSVINNANKT              | -----TIEFTS |
| Dufourea_novaeangliae         | IEAPNRNVTMYDGRDACGGDGWKVDDVSVNKNYSLMDPSSV                   | -----LRPEKN |
| Megachile_rotundifata_X1      | IEAPNQNVTMYDGRDACGGDGWKVDDVPAGSNTNSNADSPINGSKSI             | -----GQQKRN |
| Melipona_quadrfasciata        | IEAPHRNMTVYDARDACGGDGWKVDDVSATSNNTTET                       | -----NKFQKK |
| Apis_mellifera_X1             | IEAPNRNVTMYDGRDACGGDGWKVDDVSASTNSTLMD                       | -----SRQEK  |
| Eufriesea_mexicana_1          | IEAPNKNVTMYDGRDACGGDGWKVDDVSASTNTTQVESGGKFGT                | -----GRQEK  |
| Eufriesea_mexicana_2          | IEAPNKNVTMYDGRDACGGDGWKVDDVSASTNTTQVESGGKFGT                | -----GRQEK  |
| Bombus_terrestris             | IEAPNMNVTMYDGRDACGGDGWKVDDVSASTNTTLMESGKFGS                 | -----GRQEK  |
| Bombus_impatiens              | IEAPNMNVTMYDGRDACGGDGWKVDDVSASTNTTLMESGKFGS                 | -----GRQEK  |
| Polistes_dominula_X1          | IEAPNENVTMYDGRDACGGDGWRVDDVSAIEGTTKSVTPNYT                  | -----EPEKTT |
| Cephus_cinctus_X1             | IEAPNRNVTMYDGRDACGGDGWKVDDVGATESDSSVPLGEE                   | -----DSNHTE |
| Dinoponera_quadriceps_X2      | IEAPKQNVKMYDGRDACGGDGWRVEDVSAESPIPPSYNGT                    | -----ILQGPI |
| Harpegnathos_saltator_X1      | IEAPNTNVKMYDGRDACGGDGWRVEDVSAEIPSPSNGT                      | -----IPQRPI |
| Linepithema_humile_X2         | IEAPNRNVTMYDGRDACGGDGWRVEDISADSVMPQSPNS                     | -----TDRHPE |
| Linepithema_humile_X1         | IEAPNRNVTMYDGRDACGGDGWRVEDISADSVMPQSPNS                     | -----TDRHPE |
| Ooceraea_biroi                | IEAPSQNVTMYDGRDACGGDGWRVEDVSAESSTQQSHNGT                    | -----EIQGPI |
| Camponotus_floridanus         | IEAPYQNVTMYDGRDACGGDGWRVEDVSAESTSQQH                        | -----NDTQQP |
| Solenopsis_invicta            | IEAPNQNTIMYDGRDACGGDGWRVEDVSADSTTLFANQTQNS                  | -----THTDLQ |
| Pogonomyrmex_barbatus_X1      | IEAPNQNTIMYDGRDACGGDGWRVEDVSAESTTPQPQ                       | -----NSSEPV |
| Vollenhovia_emeryi_X1         | IEAPNQNVTMYDGRDACGGDGWRVEDVSAETAPSQSNKST                    | -----ELQETS |
| Wasmannia_auropunctata        | IEAPNQNVTMYDGRDACGGDGWRVEDVSADSTTMQPYNGTL                   | -----DPQEPV |
| Cyphomyrmex_costatus          | IEAPNQNVTMYDGRDACGGDGWKVEDVSAESTTMQPHNGT                    | -----ESQEPV |

```

IEAPNQNIITMYDGRDACGGDGWRVEDVSAESTTPQPHNGT-----ESQEPV
IEAPNQNIITMYDGRDACGGDGWRVEDVSAESTTPQPHNGT-----ESQEPV
IEAPNQNIITMYDGRDACGGDGWRVEDVSAESTTP-----HNGT-----ESQEPV
IEAPNQNIITMYDGRDACGGDGWRVEDVSAESTTPQPHNGT-----ESQEPV
IEAPNQNIITMYDGRDACGGDGWRVEDVSAESTTPQPHNGT-----ESQEPV
      .      :      *      *      :

```

[illegible]

-SDSKINVTWSYLDKPYGLTRYFIKAKLINRPTNR---NNRDYCTEPLVKAMEND-LPA  
-SSDSLLEWEPPQRTNGHIT EYIVTG-FSRVEESNML-NDMDFCLESFRDRLTNKKPEV  
-SSSEIVVTWEPPPEKPNGKLSHYIVKA-TMHGDDPTYL-EARDYCKYPIKKEETTT--PA  
-SSSEILLHWSPEKPNGKLVS YVVG-FIOEYHPDFL-STRNFCKKPYVHIPPTT--PP

Drosophila\_melanogaster  
Halyomorpha\_halys  
Rhodnius\_prolixus  
Cimex\_lectularius\_X1  
C.\_lectularius\_X2  
Cryptotermes\_secundus  
Miniopterus\_natalensis  
Callithrix\_jacchus  
Heterocephalus\_glaber\_X1  
Dasypus\_novemcinctus  
Tupaia\_chinensis\_X2  
Homo\_sapiens\_X1  
Pongo\_abelii\_2  
Pan\_troglodytes\_X2  
Boleophthalmus\_pectinirostris

```

TTPTTKKI-----SDPLAGD----CKCVEG----SKKTSSQEYDDR-
TTILPEFKTQIGIEKHD-----C-CSDE-----EPKKLEHP-
PRLSTDCCVDKKPEKK-----RPGDV-----CESIDP-----HLPPKLYDAP-
PKFMTHVKTQDECCVNSTIPIEDEFEPLVLTTEL--CETADE-----LAKSPPLYEY-
PKFMTHVKTQDECCVNSTIPIEDEFEPLVLTTEL--CETADE-----LAKSPPLYEY-
QLLYDESKPTDSC-----KPVSRTE--CISND-----SSFNVITYQES-
PVESEGSQKHNQSEY-----EESAGEC--CSCPKT-----DSQILKEL-
PVESEGFQKHNQSEE-----EDLAGEC--CSCPKT-----DSQILKEL-
PFESEDAQKHNQSEY-----EESAGEC--CSCPKT-----DSQILKEL-
PFESEDAQKHNQSEY-----EESAGEC--CSCPKT-----DSQILKEL-
PFESEDSQKHNQSEY-----EDSAGEC--CSCPKT-----DSQILKEL-
PFESEDSQKHNQSEY-----EDSAGEC--CSCPKT-----DSQILKEL-
PFESEDSQKHNQSEY-----EDSAGEC--CSCPKT-----DSQILKEL-
PFESEDSQKHNQSEY-----EDSAGEC--CSCPKT-----DSQILKEL-
QVDSNEEQKGNLTTEE-----HGPDKQC--CACPKT-----EKELKKEK-

```

Larimichthys\_crocea\_X2  
Larimichthys\_crocea  
Lates\_calcarifer  
Seriola\_lalandi\_dorsalis  
Seriola\_dumerili  
Zootermopsis\_nevadensis  
Parasteatoda\_tepidariorum  
Onthophagus\_nigriiventris  
Nicrophorus\_vespilloides  
Tribolium\_castaneum  
Nilaparvata\_lugens  
Blattella\_germanica  
Nasonia\_vitripennis\_X1  
Microplitis\_demolitor  
Neodiprion\_lecontei  
Athalia\_rosae  
Orussus\_abietinus  
Dufourea\_novaeangliae  
Megachile\_rotundata\_X1  
Melipona\_quadrifasciata  
Apis\_mellifera\_X1  
Eufriesea\_mexicana\_1  
Eufriesea\_mexicana\_2  
Bombus\_terrestris  
Bombus\_impatiens  
Polistes\_dominula\_X1  
Cephus\_cinctus\_X1  
Dinoponera\_quadricaps\_X2  
Harpegnathos\_saltator\_X1  
Linepithema\_humile\_X2  
Linepithema\_humile\_X1  
Ooceraea\_birai  
Camponotus\_floridanus  
Solenopsis\_invicta  
Pogonomyrmex\_barbatus\_X1  
Vollenhovia\_emeryi\_X1  
Wasmannia\_auropunctata  
Cyphomyrmex\_costatus  
Trachymyrmex\_septentrionalis  
Atta\_colombica  
Trachymyrmex\_cornetzi  
Acromyrmex\_echinator  
Atta\_cephalotes

QVDSDEEQKWNQTEE-----QGPGRTRC-----CACPKT-----DKEIKKEI-  
QVDSDEEQKWNQTEE-----QGPGRTRC-----CACPKT-----DKEIKKEI-  
QVDSDEEQKWNQTEE-----QGPGRTRC-----CACPKT-----DKELKKEK-  
QVDSDEEQKWNQTEE-----QGPGRTRC-----CACPKT-----DKELKKEK-  
PSSTSDTVSSQNCCEKGKSEP-----IVLIEDEDDYNMLCVPK-----ATKKNKIFDVYG  
-SIYDDESTQIGYFENVTSST-----ESTENEC-----CSCSKD-----QHRGDDDD-  
TTPKTSDDPAKPTDS-----PPSKNDT-----CDCTTDMRLRES---NALANKEA-  
TKISTAVKQNNNT-----CECRPA-----PPNKQPSIRKQN  
VSVPPVTSTTTSTNDT-----CQCLET-----KPSTSSINE--  
VDVTNQAGKWTLVNDDVY-----TGGKPDD-----CVCMD-----KVNKKKQOE-  
PLDGSADKKEVTNK-----CSCEDK-----TDKTKLREV-  
AEIAAEEKKRAEQELE-AS-----KIPEPST-----CECKKR-----DPVQSES-  
TEIAAEEKKRAEAER-----TKPDVAT-----CECADR-----E-SDQSIREK-  
TTPDEAAHPKPTENKR-PSST-----NGDEIETDDSKKCIDD-----K-D---LREK-  
SVLAEEERKKAQEEKM-VAAA-----KPLTST-----CQCAED-----E-DPLIREK-  
SVMVEERKKAEEKE-LI-----KIPETAT-----CECSDS-----K-SDPLIREK-  
ISAAAAERKRIEEKEE-----TIIAEST-----CECADR-----E-NDQSLIREK-  
ISLAEEERKRMEEKEQS-----VTPETGT-----CECADR-----E-TDQSLIREK-  
-ALAAEEERKRMEEKEQSQM-----MLQEASN-----CDCLDR-----E-TDQSLIREK-  
ITLAEEERKRMEEKEQ-----MVPETGT-----CECADR-----E-TDQSLIREK-  
ISIAAEEKKRIEEKEQ-----MMPETGT-----CDCADR-----E-TDQSLIREK-  
ISIAAEEKKRIEEKEQ-----MMPETGT-----CDCADR-----E-TDQSLIREK-  
-ALAAEEERKRIEEKEQ-----MIPETGT-----CECPDR-----ETDQSLIREK-  
-ALAAEEERKRIEEKEQ-----MIPETGT-----CECPDR-----ETDQSLIREK-  
SVIAAEEKKRAEEE---LV-----KIPDLAS-----CDCADR-----EL-DQSMREK-  
AAMAAEEERKKAEESE-RA-----RTPERTA-----CDCADR-----VPDQSIREK-  
SVMVEERKKAEEERDQST-----KLPDVAT-----CDCADR-----E-TDQSMREK-  
SVMVEERKKAEEERDQST-----KQLEVAS-----CDCADR-----E-ADQSMREK-  
SVMVEERKKAEEKE-LA-----KSPETTS-----CICADR-----EMADQSIREK-  
SVMVEERKKAEEKE-LA-----KSPETTS-----CICADR-----EMADQSIREK-  
SVIAAEEKKRAEEKE-LA-----KSPDAAS-----CPCTDR-----EMTDQSMREK-  
SVIAAEEKKRAEEKE-LV-----KSPETTS-----CGCADR-----ETTDQSMREK-  
EVVAEEKKYFLEKE-FS-----K---TDS-----CLCSDR-----EVTDQSMLEK-  
EVIAEEKKHTELEKE-IA-----K---SDS-----CACSDR-----ETTDQSAREK-  
EETVMEKKKPETEK-----EFTKSDS-----CSCTDR-----EMTDQSMREK-  
DVIAEEKKHTELEKE-FA-----K---SDS-----CVCSDR-----ETTDQSTREK-  
EVIAEEKKHNELEKE-FE-----K---TDS-----CICSDR-----ETTDQSMREK-  
EVIAEEKKHNELEKE-FA-----K---TDS-----CSCSDR-----ETIDQSMREK-  
EVIAEEKKHNELEKE-FA-----K---TDS-----CICSDR-----ETTDQSMREK-  
EVIAEEKKHNELEKE-FA-----K---TDS-----CICSDR-----ETTDQSMREK-  
EVIAEEKKHNELEK-----EFAKTDS-----CICSDR-----ETTDQSMREK-

Drosophila\_melanogaster  
Halyomorpha\_halys  
Rhodnius\_prolixus  
Cimex\_lectularius\_X1  
C\_lectularius\_X2  
Cryptotermes\_secundus  
Miniopterus\_natalensis  
Callithrix\_jacchus  
Heterocephalus\_glaber\_X1  
Dasypus\_noveboracensis  
Tupaia\_chinensis\_X2  
Homo\_sapiens\_X1  
Pongo\_abelii\_2  
Pan\_troglodytes\_X2  
Boleophthalmus\_pectinirostris  
Larimichthys\_crocea\_X2  
Larimichthys\_crocea  
Lates\_calcarifer  
Seriola\_lalandi\_dorsalis  
Seriola\_dumerili  
Zootermopsis\_nevadensis  
Parasteatoda\_tepidariorum  
Onthophagus\_nigriiventris  
Nicrophorus\_vespilloides  
Tribolium\_castaneum  
Nilaparvata\_lugens

-KVQA-GMEFENALQNFIFVFNIRKSKNGSSDKSDGAEGAALDSNAIPNGGATNPSRRRR  
-ELICHNKNLKEAKVASSFINLK-----EASCEK  
-----TCEKMYTLVDSTRL-----PTAEHL  
---DGCHKYVYETLEQPPFLKIY-----ENDNIGRYER  
--DGC-HKYVYETLEQPPFLKIY-----EN-----DNIGRYER  
VNEED-SCDKENSIYSVLYSPRL-----YNGGG  
-EESSFRKTFEDYLHNVFVPRP-----SRKRR  
-EESSFRKTFEDYLHNVFVPRPSPGGAEN-----SRPTRRRR  
-EESSFRKTFEDYLHNVFVPRNPSSAGGAQD-----PRPSRKRR  
-EESSFRKTFEDYLHNVFVPRKTSSGGAED-----SRPSRKRR  
-EESSFRKTFEDYLHNVFVPRKTSSGGAED-----TRPSRKRR  
-EESSFRKTFEDYLHNVFVPRKTSSGGAED-----PRPSRKRR  
-EESSFRKTFEDYLHNVFVPRKTSSGGAED-----PRPSRKRR  
-EDSEYRKTFFENYLHNEVFEIKR-----SRMRR  
-EDSEYRKTFFENYLHNEVFEIKR-----SRQRR  
-EDSEYRKTFFENYLHNEVFEIKR-----SRQRR  
-EDSEYRKTFFENYLHNEVFEIKR-----SRQRR  
-EDSEYRKTFFENYLHNEVFEIKR-----SRQRR  
VEIDPCINIFYFSFIHSGIPELKD-----EQDKL  
-EAAESQIHFEFLQNKVYIRNP-----NSYKVKR  
-ETES-RINFENELQNRVYIKRV-----APPPQP  
AEDVSNQMMFEDNLINIFYVKRI-----QKF-----INKDRKR  
-DVEKSRIDFEDELHNAVYVRKP-----N-----FSERKRKR  
-KEIQFQIQFEDTLQNLVYIKRS-----SLRDKR

|                              |                                      |
|------------------------------|--------------------------------------|
| Blattella germanica          | -EVQA-QIHFENSLHNLVYVCRP-----TQSRKR   |
| Nasonia vitripennis_X1       | -EVYS-SITFEDALHNTVYVRRQ-----DNRRRR   |
| Microplitis demolitor        | -EVSS-SIAFEDALHNQVYVVRV-----GGNNRRKR |
| Neodiprion lecontei          | -EVSS-SIAFEDALHNQVYVCRP-----SSDRRR   |
| Athalia rosae                | -EVSS-SIAFEDALHNQVYIKRP-----TNERRR   |
| Orussus abietinus            | -EVSS-SIAFEDALHNQVYVKRI-----SSRRRD   |
| Dufourea novaeangliae        | -EASS-AIAFEDAVHNQVYVVRV-----SRRKR    |
| Megachile rotundata_X1       | -EASS-SIAFEDALHNQVYVCRK-----SSSRKR   |
| Melipona quadrifasciata      | -EASS-AIEFEDALHNQVYIKRP-----SRKKR    |
| Apis mellifera_X1            | -EASS-AIDFEDALHNQVYVCRK-----PRKKR    |
| Eufriesea mexicana_1         | -EASS-AIAFEDALHNQVYVCRK-----PRKKR    |
| Eufriesea mexicana_2         | -EASS-AIAFEDALHNQVYVCRK-----PRKKR    |
| Bombus terrestris            | -EASS-AIEFEDALHNQVYIKRP-----PKKKR    |
| Bombus impatiens             | -EASS-AIEFEDALHNQVYIKRP-----PKKKR    |
| Polistes dominula_X1         | -EVSS-SIAFEDALHNQVYVKRI-----D-ARRR   |
| Cephus cinctus_X1            | -EVSS-SIAFEDALHNQVYVVKV-----N-SRRR   |
| Dinoponera quadricaps_X2     | -EVSS-SIAFEDALHNQVYVKRM-----SSRRRD   |
| Harpegnathos saltator_X1     | -EVSS-SIAFEDALHNQVYVKRN-----VNVRRR   |
| Linepithema humile_X2        | -EVSS-SIAFEDALHNQVYVKRM-----MNARRR   |
| Linepithema humile_X1        | -EVSS-SIAFEDALHNQVYVKRM-----MNARRR   |
| Ooceraea biroi               | -EVSS-SIAFEDALHNQVYVKRM-----T-TRRR   |
| Camponotus floridanus        | -EVSS-SIAFEDALHNQVYVKRM-----NARRRD   |
| Solenopsis invicta           | -EVSS-SIAFEDALHNQVYIKRA-----QSRRRH   |
| Pogonomyrmex barbatus_X1     | -EVSS-SIAFEDALHNQVYIKRI-----N-IRRR   |
| Vollenhovia emeryi_X1        | -EVSS-SIAFEDALHNQVYIKRI-----SSRRR    |
| Wasmannia auropunctata       | -EVSS-SIAFEDALHNQVYIKRM-----S-QRRR   |
| Cyphomyrmex costatus         | -EVSS-SIAFEDALHNQVYVKRM-----SQRRRR   |
| Trachymyrmex septentrionalis | -EVSS-SIAFEDALHNQVYVKRL-----SQRRRR   |
| Atta colombica               | -EVSS-SIAFEDALHNQVYVKRL-----SQRRRR   |
| Trachymyrmex cornetzi        | -EVSS-SIAFEDALHNQVYVKRL-----SQRRRR   |
| Acromyrmex echinator         | -EVSS-SIAFEDALHNQVYVKRL-----SQRRRR   |
| Atta cephalotes              | -EVSS-SIAFEDALHNQVYVKRL-----SQRRRR   |

|                               |                                                           |
|-------------------------------|-----------------------------------------------------------|
| Drosophila melanogaster       | DVALEPELDDVEGSLVLRHVRISITDDTDAFFEKDDENTYK-----            |
| Halyomorpha halys             | YFY---SILENNILKTENQPSKRYVDYKKKFVNDLED-----                |
| Rhodnius prolixus             | EEP---ADLIR-----RNKDEDEDDLVLV-----                        |
| Cimex lectularius_X1          | GIS----MIE-----EDDDLVLN-----                              |
| C. lectularius_X2             | GIS----MIE-----EDDDLVLN-----                              |
| Cryptotermes secundus         | GIY---DSVDL-----                                          |
| Miniopterus natalensis        | ALG---EEGNV-TTVVPTAPGFPNTSSTIVPTSWEQ-----                 |
| Callithrix jacchus            | SLD---DTGNM-TAEPTVAVLNTSSTMEPMSPEEP-----                  |
| Heterocephalus glaber_X1      | SLG---EVNVT--TAVPLVPGFPTLSSVSVPNTAAEEH-----               |
| Dasyus novemcinctus           | ALG---DSANV-TVAVPTVPGFPNTSSTSAPTSPEER-----                |
| Tupaia chinensis_X2           | SLG---DVGNV-TVAIPTVPGFPNTSSTSVPTSPEEH-----                |
| Homo sapiens_X1               | SLG---DVGNV-TVAVPTVAAFNTSSTSVPTSPEEH-----                 |
| Pongo abelii_2                | SLG---DVGNV-TAAVPTVAAFNTSSTSVPTSPEEH-----                 |
| Pan troglodytes_X2            | SLG---DVGNV-TVAVPTVAAFNTSSTSVPTSPEEH-----                 |
| Boleophthalmus pectinirostris | EVV---GIANH-TLPFLTAMPPTTAPG----EDKE-----                  |
| Larimichthys crocea_X2        | AVM---SIANR-THPFLTAPSPPHGTGIPEDDEE-----                   |
| Larimichthys crocea           | AVM---SIANR-THPFLTAPSPPHGTGIPEDDEE-----                   |
| Lates calcarifer              | SVM---GIANR-THPFHTTAPSPPEGTHSPDDEDEE-----                 |
| Seriola lalandi dorsalis      | SVM---GIANR-TLPFHTTAPSPPEGTHIPNDEE-----                   |
| Seriola dumerili              | SVM---GIANR-THPFHTTAPSPPEGTHIPNDEE-----                   |
| Zootermopsis nevadensis       | TLA---SRFPN-----FNSSGSSQKVLATFNNHTLIN-----                |
| Parasteatoda tepidariorum     | HIM---EFLSD-----GPSSFSSTSPASQSGDEV-----                   |
| Onthophagus nigriventris      | SMT-----LSRKKRQMFPSHNSNVSD-----                           |
| Nicrophorus vespilloides      | DLDYNLQFPNN-----SLADDESKNRSFSTQNKTD MQG-----              |
| Tribolium castaneum           | DVDS--EQLNA-----NRVFNETDEAG-----                          |
| Nilaparvata lugens            | EISLRDGKITENH----FAESDIRMKTVPVSTDLEV-----                 |
| Blattella germanica           | DVSMWGDVSHN--SIEPMPGDDDDYPNMAHRYPDSVDPHM-----             |
| Nasonia vitripennis_X1        | DVS---YTSVM-LEAVRMKRELTYQEKDVISHSKSLQNSKTNPEQERSLEQQKILNP |
| Microplitis demolitor         | DIS---TDFKP-----NDSDSLKK-----                             |
| Neodiprion lecontei           | DVS---EIVKT-AKMW---QEQNVSYSYP-----EDKDNAL-                |
| Athalia rosae                 | DLS---ETVRS-AMVM---RRD--LHSYP---EDKEN-LS-----             |
| Orussus abietinus             | TRE---SRALN-AV----THESNAHVNS---QDKKN-GM-----              |
| Dufourea novaeangliae         | DVA---RVALV-GG---ADRSP-----DQP-VL-----                    |
| Megachile rotundata_X1        | ELD---QISYS-SS---KTSKPS-----DQP-IV-----                   |
| Melipona quadrifasciata       | EIS---EMFVS-----RKAKALEQLPM-----                          |
| Apis mellifera_X1             | DVS---DILF-----RKTksL-----DQP-VM-----                     |
| Eufriesea mexicana_1          | DVS---DMSFG-SS---RKTkAA-----DRDQP--M-----                 |

```
DVS---DMSFG-SS---RKTCAA-----DRDQP-M-----
DVS---EMSFI-----LSRKTKS-----LDRDQPM-----
DVS---EMSFI-----LSRKTKS-----LDRDQPM-----
DTS---EILRA-VRM---MEQNTTQAEA---LQKKY-PN-----
DVS---AMLSA-VR---KNPDTYYSSYP---EDKDP--N-----
TKG---T-----LGQSRDFYND---QNEES-SS-----
ETL-----ERYKNSYDDQDEEN-SN-----
DTS---EMLVA-AS---LGQIS-----EEKEK-DA-----
DTS---EMLVA-AS---LGQIS-----EEKEK-DA-----
DTS---EMLIA-AD---LAKDSSYSYD---QDKES-AN-----
VKS---EMLIT-AE---LAKDSNY---NQQDKEG-IN-----
TDS---EMLIA-AQ---LAKEPTF---KKVQNWES-I-S-----
HTS---EMLIA-AE---EAKNFTH---NQVKFQDRGI-FN-----
YTN---EVAAS---QAENSSYDPVKFQARESAN-----
GAT---EMLNM-VKKESVLNDDFSYVQD---RERES-TN-----
HIS---EMLIA-AD---LARESTY-E---QDKES-IN-----
HTS---EMLIA-AD---LAKEITY-D---QDRES-TN-----
HTS---EMLIA-AD---LAREFTY-D---QDRES-TN-----
HTS---EMVIA-AD---LAREFTY-D---QDRES-TN-----
HTS---EMLIA-AD---LAKEFTY-D---QDRES-TN-----
HTS---EMLIA-AD---LAREFTYD---QDRES-TN-----
```

```
--DEEDLSSNKQFYEVFA-KELPNNQTHFVIEKLRHFTRYAIFVVCACREEIP---SEKLR
--VKKKKP---LFTIYE---IVPGNRTNVTIKNLDHFMFLYTEFVKACRQIDP---AEEVV
--EDLEQFNSDGTYSASFT-ARYPHNVTLVLTISNLKHYTAYTVEVIACRERHP---RDSAT
--EDVEMLGRDGLSLVKFH-RIFPAEANVALIGLRHFTSYTIEVKACRERVE---GELQR
--EDVEMLGRDGLSLVKFH-RIFPAEANVALIGLRHFTSYTIEVKACRERVE---GELQR
-----ADGHFM-QRSEGNTTTPVVIKDLHHFSKYTMKVVCVRKNHS---GEVDF
-----RPFE-KVV--NKESLVISGLRHFTGYRIELQACNQDSP---EER--
-----KPFE-KVV--NRESLVISGLRHFTGYRIELQACNQDTP---EER--
-----RPFE-KVV--NKESLVISGLRHFTGYRIELQACNQDAP---EER--
-----RPFE-KVV--NKESLVISGLRHFTGYRIELQACNQDVP---EER--
-----RPFE-KVV--NKESLVISGLRHFTGYRIELQACNQDTP---EER--
-----RPFE-KVV--NKESLVISGLRHFTGYRIELQACNQDTP---EER--
-----RPFE-KVV--NKESLVISGLRHFTGYRIELQACNQDTP---EER--
-----RPFE-KVV--NKESLVISGLRHFTGYRIELQACNQDTP---EER--
-----SFESTRTVTVDHAKESAVISNLRHFTSYQIEIHACNHPTD---QAR-
--TFESTKTVTVTHAKESTVISNLRHFTSYQIEIHACNHPTD---PAR-
--TFESTKTVTVTHAKESTVISNLRHFTSYQIEIHACNHPTD---PAR-
--TFESTKTVTVTHAKESTVISNLRHFTSYQIEIHACNHPTD---PSR-
--TFESTKSVVTVHAKESTVISNLRHFTSYQIEIHACNHPTD---PAR-
--TFESTKSVVTVHAKESTVISNLRHFTSYQIEIHACNHPTD---PAR-
-----SYG---VYEKFL-KRINANTTQIVLNMHHMFAQYTIKVAACHEPHY---ADLQK
--TQYKNG---NLLHFK-EVVRHNPF-LVVTNLKHFTYTTIEVRACQDKSE---KNI-
--SYVGNK---TYV---ATYIVTGTFFIITNLQHTTSYEISVQACRKTE---DKGDF
-----KFIVFSYKYV---GKTELRIDNLKHFTAYEITIEACQNKDD---PTDMS
-----AYISFS-TVV---TGTEFYMPLNRHFTVYIEINVQACREKTN---DKLDT
--QRLNE---PQV---KILLQKTSYQVIRGLHHFAQYTTISVSACRQRDE---TDK-L
--DMVSQEPPIPKMYDQFQHVYGNTOYFVINNLSTQVIEHTEYTTISVACREIAPDEPANT
DEDYIEDG---AIVYFK-RKVPANELNFVMGLRHYGKYNIKVTAACRDKKA---NAH--
--NETEED---SEQKFE-RLVPSSNLSFVMNLRHFAFYNIELQACREPVP---DDV--
--DDMVNG---SISLFN-RTV-YGQTNYAVKNLRHYAVYTTIEVQACREPVP---NES-Q
--EKVENG---SYIVFN-RTV-YGQTFSMKNLRHFAVYTTIEVQACREPVP---NDT-L
--DVIKNG---SYVIFE-RNVSSSFTFVPMKELRHHFAAYNIEVLACRERIP---DDA-Q
--DKMENN---SYIVFE-RNISSTNLSFTMKNLRHFAVYNIIEVQVCRHQEM---NDT-
--DKMENG---TVVIFE-RLVPSTNLSFVMKMLRHHFAAYNIEVQACRAQEM---NDT-
--EKIENG---TSVFFE-HVVPSTNLSFVMKMLRHHFAAYNIEVQACRAQDL---NDT-
--KKV-NG---TYVAFE-ENVPSTNRSFVPMKDLRHHFAAYNIEVQACRAQEM---NDT-
--EKIENG---VYTAFE-QMVPSTNLSFVMKMLRHHFAAYNIEVQACRATTEM---NDT-
--EKIENG---VYTAFE-QMVPSTNLSFVMKMLRHHFAAYNIEVQACRATTEM---NDT-
--EKIENG---TYIVFE-QLVPSMNLFSVMKMLRHHFAAYNIEVQACRAQEM---NDT-
--EKIENG---TYIVFE-QLVPSMNLFSVMKMLRHHFAAYNIEVQACRAQEM---NDT-
--EEMINN---TYITFD-RIVPTPNLSYVVKNLRHFAAYNIEVQACREVVK---NDT-
--DKLEDG---IYTTFE-RLVPSTNLSFVMKMLRHHFAAYNIEVQACREVRTV---NDS-
--NKIENG---TYVAFE-VLPSTNLTYVMKMLRHHFAAYDIEVQACRERV---NGT-N
--NKIENG---TYTAFE-VLPSTNLTYVMKMLRHHFAAYDIEVQACRERV---NAT-S
--TKVVNG---TVIMFD-KRVPPTNLTLVMRNLRHHFAAYNIEVQACRERVG---NET-K
--TKVVNG---TVIMFD-KRVPPTNLTLVMRNLRHHFAAYNIEVQACRERVG---NET-K
--DKIENG---TYTVFE-RLVPSTNLTYVMKMLRHHFAAYNIEVQACRERVG---NES-K
--DKLDNG---TYTVFE-RLIPSTNLSVVMKMLRHHFAAYNIEVQACRERVE---NED-D
```



Solenopsis\_invicta  
Pogonomyrmex\_barbatus\_X1  
Vollenhovia\_emeryi\_X1  
Wasmannia\_auropunctata  
Cyphomyrmex\_costatus  
Trachymyrmex\_septentrionalis  
Atta\_colombica  
Trachymyrmex\_cornetzi  
Acromyrmex\_echinatior  
Atta\_cephalotes

Drosophila\_melanogaster  
Halyomorpha\_halys  
Rhodnius\_prolixus  
Cimex\_lectularius\_X1  
C.\_lectularius\_X2  
Cryptotermes\_secundus  
Miniopterus\_natalensis  
Callithrix\_jacchus  
Heterocephalus\_glaber\_X1  
Dasypus\_noveboracensis  
Tupaia\_chinensis\_X2  
Homo\_sapiens\_X1  
Pongo\_abelii\_2  
Pan\_troglodytes\_X2  
Boleophthalmus\_pectinirostris  
Larimichthys\_crocea\_X2  
Larimichthys\_crocea  
Lates\_calcarifer  
Seriola\_lalandi\_dorsalis  
Seriola\_dumerili  
Zootermopsis\_nevadensis  
Parasteatoda\_tepidariorum  
Onthophagus\_nigritarsis  
Nicrophorus\_vespilloides  
Tribolium\_castaneum  
Nilaparvata\_lugens  
Blattella\_germanica  
Nasonia\_vitripennis\_X1  
Microplitis\_demolitor  
Neodiprion\_lecontei  
Athalia\_rosae  
Orussus\_abietinus  
Dufourea\_novaeangliae  
Megachile\_rotundata\_X1  
Melipona\_quadrfasciata  
Apis\_mellifera\_X1  
Eufriesea\_mexicana\_1  
Eufriesea\_mexicana\_2  
Bombus\_terrestris  
Bombus\_impatiens  
Polistes\_dominula\_X1  
Cephus\_cinctus\_X1  
Dinoponera\_quadricaps\_X2  
Harpegnathos\_saltator\_X1  
Linepithema\_humile\_X2  
Linepithema\_humile\_X1  
Ooceraea\_biroi  
Camponotus\_floridanus  
Solenopsis\_invicta  
Pogonomyrmex\_barbatus\_X1  
Vollenhovia\_emeryi\_X1  
Wasmannia\_auropunctata  
Cyphomyrmex\_costatus  
Trachymyrmex\_septentrionalis  
Atta\_colombica  
Trachymyrmex\_cornetzi  
Acromyrmex\_echinatior  
Atta\_cephalotes

--DKMENG----SVLVFE--RIIPSTNLTFVVRNLRHFTAYNIEVQACRELDASELNNDT-K  
--DKVVND----TYLVFD--RLVPSTSLTFVVRNLRHFAAYNIEVQACRERVA---NETNK  
--NKAENG----TFIVFE--RSVPSTNHSFVMKNLQHFAAYNIEVQACREPVE---NDT--  
--DKIENG----TFIVFE--RLIPSTNHTFVVRNLRHFAAYNIEVQACRERVG---NDT-K  
--DKVENG----TFTVFE--RLIPSTNLTFVVRNLRHFAAYNIEVQACRERVG---NDT-K  
--DKMENG----TFTVFE--RLIPSTNLTFVVRNLRHFAAYNIEVQACRERVG---NDT-K  
--DKVENG----TFTVFE--RLIPSTNLTFVVRNLRHFAAYNIEVQACRERVG---NDT-K  
--DKVENG----TFTVFE--RLIPSTNLTFVVRNLRHFAAYNIEVQACRERVG---NDT-K  
--DKVENG----TFTIFE--RLISSTNLTFVVRNLRHFAAYNIEVQACRERVG---NDT-K  
--DKVENG----TFTVFE--RLIPSTNLTFVVRNLRHFAAYNIEVQACRERVG---NDT-K

. : \*. \* . : .\*

DTSFKKSL-----CSDYDTVFQTTKRKKFADIV-MDLKVDLE----HANNTESPVVR  
TDKDR-----CSMSSTVTLRLTLRKLDADDV-SWLTTEVN-----NRSVQLK  
T--KR-----CSLNAFTLRLTLDPKADNIEGGIKESVVE-----NRTVITIT  
S--AN-----CSISAFITLKTLSDSKADEIVGGLRVQVE-----NRTAILN  
S--AN-----CSISAFITLKTLSDSKADEIVGGLRVQVE-----NRTAILN  
EWNDKQ-----CSPASLITARTRKLETADHI--DSSSVKVT-----VASGTVRVF  
-----CSVAAYVSARTMPEAKADDIVGPVTHEIF-----ENNIVHLM  
-----CSVAAYVSARTMPEAKADDIVGPVTHEIF-----ENNIVHLM  
-----CSVAAYVSARTMPEAKADDIVGPVTHEIF-----DNNVHLM  
-----CSVSAYVSARTMPEAKADDIVGPVTHEIF-----ENNIVHLM  
-----CSVAVYISARTMPEAKADDIVGPVTHEIF-----ENNIVHLM  
-----CSVAAYVSARTMPEAKADDIVGPVTHEIF-----ENNIVHLM  
-----CSVAAYVSARTMPEAKADDIVGPVTHEIF-----ENNIVHLM  
-----CSVAAYVSARTMPEAKADDIVGPVTHEIF-----ENNIVHLM  
-----CSMAAYVSARTLPEDKADDIVTAIGYEVV-----DNTVHIS  
-----CSMAAYVSARTMPEDKADDIASPINYEVT-----ENTVHIT  
-----CSMAAYVSARTMPEDKADDIASPINYEVT-----ENTVHIT  
-----CSMAAYVSARTMPEDKADDIVGPILYEVT-----ENTVHIT  
-----CSMAAYVSARTMPEDKADDIVGPISYNVA-----ENTVHIT  
-----CSMAAYVSARTMPEDKADDIVGPISYDVA-----ENTVHIT  
Y--NTNDITLAEYEWCSFAGLVTVRTRKHLAIADTI--DSDHLAAQ--VS---NGTSGTVRLT  
---EP-----CSKAITSVRTLHLGAGADDI--RSSSVH---ILTE--NVYAYSSPIR  
Q--PN-----CSDSTSKEIRTESKHDADNI--ASNISIV-----SVTENSITIS  
Y--KP-----CSQKALTARTESKAGADKI---TEVRVA-----NKSMSMVTLV  
E--NP-----CSSKNMKTHRTLKKKGADDI---KQIEVK-----NQSLGMVSLT  
IMTNN-----CSTHSIISARTKKLANADV--SEIWEHV--IENPVNHTQPIVKLY  
T--TN-----CSQQSFLTARTLRLPGADNV--LSSKLVE--VLNE---SRIVKLK  
E--LP-----CSSESMSKSLQTLRLDHADDEI--PSGTLRLQ--KQAN--NDSSTSIKLT  
S--QR-----CSTKIIQNCRTLPEFHADDI--PTGSLKLEKIHG--NTRSPIVKLQ  
S--NY-----CSTKSIKTARTEPLISADDI--PNNTFDLEVITG--NNSRSMVKLS  
N--SC-----CSTKSIKTARTLPIDSADDI--PQNSFKYNNVVG--NNSSESTVNLW  
D--KP-----CSTKSMRTYRTLPLESADDI--PPESFQMN--LGG--NNSLTMVTLQ  
L--KK-----CSTKIMRTYRTLPLESADNI--PPDSFKMR--ISGE--NNSLTMVTLQ  
Y--KK-----CSTKSMRTYRTLPMKSADNI--PPNTFKMS--ISGE--NNSLTMVTLQ  
Y--RR-----CSTKSMRTYRTLPLDSADNI--PPNTFKIS--ISGE--NNSLTMVTLQ  
Y--KK-----CSTKSMRTFRTMSLDSADNI--PPNTFKMS--ISGE--NNSLTMVTLQ  
Y--KN-----CSTKSMRTFRTLRLSADNI--PPNSFKIS--ISGE--NNSLTMVTLQ  
Y--KN-----CSTKSMRTFRTLRLSADNI--PPNSFKIS--ISGE--NNSLTMVTLQ  
Y--KK-----CSTKSMRTYRTLPLESADNI--PPNTFKMS--ISGE--NNSLTMVTLQ  
Y--KK-----CSTKSMRTYRTLPLESADNI--PPNTFKMS--ISGE--NNSLTMVTLQ  
N--DT-----CSTKSMRTYRTLPLKGADNI--PPNTLKW--KIKT--NNTFD--IKLT  
L--NN-----CSTKSMRTYRTLPLESADNI--PANTFKLS--TIGG--NNSLAMVRLQ  
I--KN-----CSTKSMRTYRTLAMESADNI--PPNTFKLS--VSNE--NNSITVVMVF  
I--KN-----CSTKSMRTYRTLAMESADNI--PANTFRAT--LGG--NNSVAVVTLN  
K--KN-----CSTKSMRTYRTFAMESADNI--PLNTFRLS--ISGENNNSLTAVTLY  
K--KN-----CSTKSMRTYRTFAMESADNI--PLNTFRLS--ISGENNNSLTAVTLY  
K--KN-----CSTKSMRTYRTLAMESADNI--PPNTFKLS--ISGE--NNSLTMVTLQ  
SKKN-----CSTKSMRTYRTLAMESADNI--PPNTFKFS--ISGG--NNSLTIVTLY  
S--KN-----CSMKSMRTYRTLAMENADNI--PPNTFTLT--KSGE--NNSLTIIITLS  
S--KN-----CSTKSMKTHRTLAMESADNI--PLNTFDLK--VNGE--NNSLTIIITLR  
T--QN-----CSTKSMKTHRTLPMDDADNI--PPDTFKLK--YSGE--NNSLTIVTLS  
S--KN-----CSTKSMKTHRTLSMDIADNI--PADTFQLK--TSGE--NNSLPVTLQ  
S--KN-----CSTKSMKTYRTLSMESADNI--PPNTFELK--TSGE--NNSFTIVTLS  
S--KN-----CSTKSMKTHRTLFMESADNI--PSNTFELK--TSGE--NNSFTIVTLS  
S--KN-----CSTKSMKTYRTLSMESADNI--PSNTFELK--TSGE--NNSFTIVTLS  
N--NN-----CSTKSMKTYRTLSMESADNI--PSNTFELK--TSGE--NNSFTIVTLS  
S--KN-----CSTKSMKTYRTLSMESADNI--PSNTFELK--TSGE--NNSFTIVTLS  
S--KN-----CSTKSMKTYRTLSMESADNI--PSNTFELK--TSGE--NNSFTIVTLS

\*\* \* \*\* : :

Drosophila\_melanogaster  
Halyomorpha\_halyi  
Rhodnius\_prolixus  
Cimex\_lectularius\_X1  
C.\_lectularius\_X2  
Cryptotermes\_secundus  
Miniopterus\_natalensis  
Callithrix\_jacchus  
Heterocephalus\_glaber\_X1  
Dasypus\_novemcinctus

RANSIAG--YGDFTEV-----EH--IKVEPPPS---YAKVFFWLLGLIGLAFLIVLSLF  
RAISLAG--LGNFTEY-----KL--VSIYQFSS---KKIILIVGVGAICIIIVAALAA  
RALSLAG--AGEFTEP-----EH--FSISEYSS---TNIITTF-FVITITILLIGI  
RSQSLAG--PGKFTAP-----VY--FTISGQFA-K-DMMAVAVLTV-VILLVILSVT  
RSQSLAG--PGKFTAP-----VY--FTISGQFA-K-DMMAVAVLTV-VILLVILSVT  
KTTSLAG--ESKYTNI-----AT--FTVNREIQ-TASRRPEIFVLL-SVIISSILLF  
RATSLAG--NGSWTDP-----TY--FYVANLYDVPNSIAKIVIGPL-V-FVFLFSVVI  
RATSLAG--NGSWTEP-----TY--FYVSDYLDVPSNSIAKIIIGPL-I-FVFLFSVVI  
RATSLAG--NGSWTEA-----TY--FYVTNYSDVSSNSIAKMIIGPL-I-FVFLFSIVI  
RATSLAG--NGSWTEA-----TY--FYVTDYLDVPSNPITKIIIGPL-I-FVFLFSIVI

Tupaia\_chinensis\_X2  
Homo\_sapiens\_X1  
Pongo\_abelii\_2  
Pan\_troglodytes\_X2  
Boleophthalmus\_pectinirostris  
Larimichthys\_crocea\_X2  
Larimichthys\_crocea  
Lates\_calcarifer  
Seriola\_lalandi\_dorsalis  
Seriola\_dumerili  
Zootermopsis\_nevadensis  
Parasteatoda\_tepidariorum  
Onthophagus\_nigriventris  
Nicrophorus\_vespilloides  
Tribolium\_castaneum  
Nilaparvata\_lugens  
Blattella\_germanica  
Nasonia\_vitripennis\_X1  
Microplitis\_demolitor  
Neodiprion\_lectei  
Athalia\_rosae  
Orussus\_abietinus  
Dufourea\_novaeangliae  
Megachile\_rotundata\_X1  
Melipona\_quadrifasciata  
Apis\_mellifera\_X1  
Eufriesea\_mexicana\_1  
Eufriesea\_mexicana\_2  
Bombus\_terrestris  
Bombus\_impatiens  
Polistes\_dominula\_X1  
Cephus\_cinctus\_X1  
Dinoponera\_quadriceps\_X2  
Harpegnathos\_saltator\_X1  
Linepithema\_humile\_X2  
Linepithema\_humile\_X1  
Ooceraea\_biroi  
Camponotus\_floridanus  
Solenopsis\_invicta  
Pogonomyrmex\_barbatus\_X1  
Vollenhovia\_emeryi\_X1  
Wasmannia\_auropunctata  
Cyphomyrmex\_costatus  
Trachymyrmex\_septentrionalis  
Atta\_colombica  
Trachymyrmex\_cornetzi  
Acromyrmex\_echinator  
Atta\_cephalotes

Drosophila\_melanogaster  
Halyomorpha\_halys  
Rhodnius\_prolixus  
Cimex\_lectularius\_X1  
C.\_lectularius\_X2  
Cryptotermes\_secundus  
Miniopterus\_natalensis  
Callithrix\_jacchus  
Heterocephalus\_glaber\_X1  
Dasypus\_novemcinctus  
Tupaia\_chinensis\_X2  
Homo\_sapiens\_X1  
Pongo\_abelii\_2  
Pan\_troglodytes\_X2  
Boleophthalmus\_pectinirostris  
Larimichthys\_crocea\_X2  
Larimichthys\_crocea  
Lates\_calcarifer  
Seriola\_lalandi\_dorsalis  
Seriola\_dumerili  
Zootermopsis\_nevadensis

RATSLAG--NGSWTEA-----TY--FYVTDYV-PSNIAKIIIGPL--IFVFLFSVVI  
RATSLAG--NGSWTEP-----TY--FYVTDYV-PSNIAKIIIGPL--IFVFLFSVVI  
RATSLAG--NGSWTEP-----TY--FYVTDYLDVPSNIAKIIIGPL-I-FVFLFSVVI  
RATSLAG--NGSWTEP-----TY--FYVTDSDP-M-SIVKIAVAPV-ICFALLLIVA-  
RATSLAG--NGSWTEP-----TY--FYVQDASD-PLYIVKIVIGPI-ICFVLLLFVS-  
RATSLAG--NGSWTEP-----TY--FYVQDASD-PLYIVKIVIGPI-ICFVLLLFVS-  
RATSLAG--NGSWTEP-----TY--FYVQDPSD-PLYVVKIVIGPV-ICFVLLLFVA-  
RATSLAG--NGSWTEP-----TY--FYVQDASD-PLYVVKIVIGPV-ICFVLLLFVA-  
RATSLAG--NGSWTEP-----TY--FYVQDASD-PLYVVKIVIGPV-ICFVLLLFVA-  
RAMSLAG--EGPFTKL-----FH--FTVEELPA---VSSWGSIMGVFVGCLLVLICFI  
RATSMAG--HGNWTS�-----VY--FHIVAASE---SSATEPILVWL-GIILFLCIAIG  
QAISDAN-TGGAFSLP-----VS--VYIDEPSD-----SWNIIAGI-IILVLIVGFI-  
IGKSQAD--YGEYSKLYSELDDSKYSTFSIDEPNS---GISELAKIATGLAVVFTFIVV-  
SATTSAG--YANFSPY-----AY--FYIEERPS---NTYVTLI---VCMILILVILA  
CATSLAGLANCSQSP-----RY--FEIQGYSS-V-TSLQIIIFATF-MTAGMLLIL--  
RATSLAG--VGDTAV-----RY--FFIKEAAT-T-NNMEILIGAL-VGTAVVTTMLC  
RATSFAG--NGEYTEP-----KY--FDVPESNY-SMPAWKVILIVL-FSISFILGAFI  
RATSLAG--SGADSEV-----LY--VYIDEDSA-K-EVFWIVFWSV-SSIVILITSL-  
RATSLYG--NGAYTV-----KH--FYIEELNA---GGSHPFLWPL-LSVGLLILIL  
RATSLAG--NGAYTAT-----KY--FYIRELNA---GGSHPFLWPL-LSVGLLILIL  
RATSLAG--NGAYTNV-----RY--FYIEEYNT-T-GKFWIMFWSI-GFIVIVILPL-  
RATSLAG--NGAYTEV-----KY--FYIQERNI-L-STFWLVFWLL-FCLLVLATSF-  
RATSLAG--YGDYTV-----KY--FYIEERNI-I-GVFWILFWLL-LGCVLLIFSL-  
RATSLAG--YGAYTHV-----RY--FYVDERNG-V-STFWLIFWVL-FCAISVIVG--  
RATSLAG--NGAYTHV-----KY--FYIEERNI-M-NTFWIVFWLL-FCAVLAALSL-  
RATSLAG--YGAYTNV-----KY--FYIEERYT-I-ITFWVFWLL-FCVFIASL-  
RATSLAG--YGAYTNV-----KY--FYIEERYT-I-ITFWVFWLL-FCVFIASL-  
RATSLAG--YGAYTHV-----KY--FYIEERNI-L-STFWVIFWLL-LCVFIAAFGF-  
RATSLAG--YGAYTHV-----KY--FYIEERNI-L-STFWVIFWLL-FCAVIAIVSF-  
RATSLAG--NGNYTEP-----SY--FFIEESNI---GLYVWLFWSI-FCILVVLSP-  
RATSLAG--NGAYTEV-----KY--FYIEEYST-S-GTFWILFWCI-LVLVAILVC-  
RATSLAG--NGAYTEL-----RY--FYVEEYGT-I-STFWILSLSF-FCIIMIPVLM-  
RATSLAG--NGAYSEL-----RI--FYIEEYGT-ISSTSWIL-LVV-FCIIFILVSM-  
RATSLAG--NGAYTEV-----KY--FYIPESGT-I-SKFQIILFSI-LGCVLLIPMTW  
RATSLAG--NGAYTEV-----KY--FYIPESGT-I-SKFQIILFSI-LGCVLLIPMTW  
RATSLAG--YGAYTEV-----KY--FYIREYGG-----YATLLGSI-FGSIAFILVLG  
RATSLAG--YGAYTEV-----KY--FYIKEYGM-L-STFWIFFWLI-LTLMSSIL-  
RATSLAG--NGAYTEV-----KY--FSIEESDT-L-SEFWIVICSI-IGVMTIIF-  
RATSLAG--NGAYTEV-----QY--FYVREHGA-F-STTWIFFWLI-LGVVIFLFL-  
RATSLAG--NGAYTEI-----KY--FSIPEYGT-F-NTFWVFWFSI-LGIVIMFSSL-  
RATSLAG--NGAYTEV-----KY--FYISEHGT-L-STFWIFFWLI-LSIVIMSSSL-  
RATSLAG--NGAYTEV-----KY--FYIPEYGT-F-GTFWIFFWLI-LGVVIMFSSL-  
RATSLAG--NGAYTEV-----KY--FYIPEYGT-F-GTFWIFFWLI-LGVVIMFSSL-  
RATSLAG--NGAYTEV-----KY--FYIPEYGT-F-GTFWIFFWLI-LGVVIMFSSL-  
RATSLAG--NGVYTEV-----KY--FYIPEYGT-F-STFWILFWSI-LGVVIMFSSL-  
RATSLAG--NGAYTEV-----KY--FYIPEYGT-L-GTFWILFWSI-LGVVITFTSL-  
RATSLAG--NGAYTEV-----KY--FYIPEYGT-F-GTFWILFWSI-LGIVITFSSL-

: . : . :

GYVCYLHKKRVPSNDL---HMNTEVNPFYASM-----Q-YIPDDWEVLRENIQLAPLG  
SVAYFWKRITMRNE---LIASVNPEYLGL-----P-LVDEEWELPRERQVIRELK  
VAGFVYYHRRKMNQEV---LIASVNPEYFGL-----P-TVDEEWELPRDRVIRELK  
LAVWYYRKNLMINQP---VLIASVNPEYCGL-----L-HFDEEWELPRERVHIVKELK  
LAVWYYRKNLMINQP---VLIASVNPEYCGL-----L-HFDEEWELPRERVHIVKELK  
CLSYFLRKKMKENAFR---TIVTSPNPEYVSL-----AIYEDWEIVRDKIELVRLMS  
GSIYFLRKKRQPDGPMG-PLYASSNPEYLSASDVFPSCSV-YVPDEWEVPRDKITLLRELG  
GSIYFLRKKRQPDGPMG-PLYASSNPEYLSASDVFPSCSV-YVPDEWEVPRDKITLLRELG  
GSIYFLRKKRQPDGPMG-PLYASSNPEYLSASDVFPSCSV-YVPDEWEVPRDKITLLRELG  
GSIYFLRKKRQPDGPMG-PLYASSNPEYLSASDVFPSCSV-YVPDEWEVPRDKITLLRELG  
GSIYFLRKKRQPDGPMG-PLYASSNPEYLSASDVFPSCSV-YVPDEWEVPRDKITLLRELG  
GSIYFLRKKRQPDGPMG-PLYASSNPEYLSASDVFPSCSV-YVPDEWEVPRDKITLLRELG  
GSIYFLRKKRQPDGPMG-PLYASSNPEYLSASDVFPSCSV-YVPDEWEVPRDKITLLRELG  
GSIYFLRKKRQPDGPMG-PLYASSNPEYLSASDVFPSCSV-YVPDEWEVPRDKITLLRELG  
IGGFVVMFKNQQTQPSG-P-IYASSNPEYLSAND-----V-YEEDWEVPRDKINILRELG  
VAGFVMFKNQQTQPSG-P-IYASSNPEYLSAND-----V-YEEDWEVPRDKINILRELG  
VAGFVMFKNQQTQPSG-P-IYASSNPEYLSAND-----V-YEEDWEVPRDKINILRELG  
VAGFVMFKNQQTQPSG-P-IYASSNPEYLSAND-----V-YEEDWEVPRDKINILRELG  
VTGFVMFKNQQTQPSG-P-IYTSSNPEYLSAND-----V-YEEDWEVAREKINILRELG  
VTGFVMFKNQQTQPSG-P-IYTSSNPEYLSAND-----V-YEEDWEVAREKINILRELG  
VLAMLWWKKRAKERSLM---IIASVNPDYISAGD-----VIYVEDDWEVAREELKLVRELG

Drosophila\_melanogaster  
Halyomorpha\_halys  
Rhodnius\_prolixus  
Cimex\_lectularius\_X1  
C.\_lectularius\_X2  
Cryptotermes\_secundus  
Miniopterus\_natalensis  
Callithrix\_jacchus  
Heterocephalus\_glaber\_X1  
Dasypus\_novemcinctus  
Tupaia\_chinensis\_X2  
Homo\_sapiens\_X1  
Pongo\_abelii\_2  
Pan\_troglodytes\_X2  
Boleophthalmus\_pectinirostris  
Larimichthys\_crocea\_X2  
Larimichthys\_crocea  
Lates\_calcarifer  
Seriola\_lalandi\_dorsalis  
Seriola\_dumerili  
Zootermopsis\_nevadensis  
Parasteatoda\_tepidariorum  
Onthophagus\_nigriventris  
Microphorus\_vespilloides  
Tribolium\_castaneum  
Nilaparvata\_lugens  
Blattella\_germanica  
Nasonia\_vitripennis\_X1  
Microplitis\_demolitor  
Neodiprion\_lecontei  
Athalia\_rosae  
Orussus\_abietinus

[illegible]

Drosophila\_melanogaster  
Halyomorpha\_halys  
Rhodnius\_prolixus  
Cimex\_lectularius\_X1  
C.\_lectularius\_X2  
Cryptotermes\_secundus  
Miniopterus\_natalensis  
Callithrix\_jacchus  
Heterocephalus\_glaber\_X1  
Dasypus\_novemcinctus  
Tupaia\_chinensis\_X2  
Homo\_sapiens\_X1  
Pongo\_abelii\_2  
Pan\_troglodytes\_X2  
Boleophthalmus\_pectinirostris  
Larimichthys\_crocea\_X2  
Larimichthys\_crocea  
Lates\_calcarifer  
Seriola\_lalandi\_dorsalis  
Seriola\_dumerili  
Zootermopsis\_nevadensis  
Parasteatoda\_tepidariorum  
Onthophagus\_nigriiventris  
Nicrophorus\_vespilloides  
Tribolium\_castaneum  
Nilaparvata\_lugens  
Blattella\_germanica  
Nasonia\_vitripennis\_X1  
Microplitis\_demolitor  
Neodiprion\_lecontei  
Athalia\_rosae  
Orussus\_abietinus  
Dufourea\_novaeangliae  
Megachile\_rotundata\_X1  
Melipona\_quadrifasciata  
Apis\_mellifera\_X1  
Eufriesea\_mexicana\_1  
Eufriesea\_mexicana\_2  
Bombus\_terrestris  
Bombus\_impatiens  
Polistes\_dominula\_X1  
Cephus\_cinctus\_X1  
Dinoponera\_quadriceps\_X2

[illegible]

[illegible][illegible]



DILQMAVEIADGMSYLAAKKFVHRDLAARNCMVAEDLTVKIGDFGMTRDIYETDYYRKGS  
DILQMAVEIADGMSYLAAKKFVHRDLAARNCMVAEDLTVKIGDFGMTRDIYETDYYRKGS  
DILQMAVEIADGMSYLAAKKFVHRDLAARNCMVAEDLTVKIGDFGMTRDIYETDYYRKGS  
DILQMAVEIADGMSYLAAKKFVHRDLAARNCMVAEDLTVKIGDFGMTRDIYETDYYRKGS  
\* \* \* \* \* \* \* \* \* \* \* \* \* \* \* \* \* \* \* \* \* \* \* \* \* \* \* \* \* \* \* \* \*

[illegible]

MERPENCDFLHKLMLQRCWHRRSSARPSFLDIITAYLEPQCPN-SQFKEVS-FYHSEAG--  
LDLPPIYPKPFKTLMLWCWKWKPKFRPSFLQILDELHEHTT--KGFREVSYDSEPG--  
LELPVYPRPFKTLIMAWCWRWKPKFRPCFFQILSELEHLLT--VSFRTVCFY-----  
LELPVYPRPFKSLTAWCWRWKPKFRPSFIEILRELEYMT--VSFRQVS-FNSEAG--  
LELPVYPRPFKSLTAWCWRWKPKFRPSFIEILRELEYMT--VSFRQVS-FNSEAG--

Drosophila\_melanogaster  
Halyomorpha\_halys  
Rhodnius\_prolixus  
Cimex\_lectularius\_X1  
C.\_lectularius\_X2  
Cryptotermes\_secundus  
Miniopterus\_natalensis  
Callithrix\_jacchus  
Heterocephalus\_glaber\_X1  
Dasypus\_novemcinctus  
Tupaia\_chinensis\_X2  
Homo\_sapiens\_X1  
Pongo\_abelii\_2  
Pan\_troglodytes\_X2  
Boleophthalmus\_pectinirostris  
Larimichthys\_crocea\_X2

```

-----LQHREKERKERHQLDAFAAVPLDQDLQDREQQEDATTPLRMGDYEQNSSLDQPPE
-----REAREA
-----
-----LQASRG-----AHSSET
-----LQASRG-----AHSSET
-----HELRGTWYQQRTRSF-----FEED-----
-----KAPESEE-----LEME-----FEDMES
-----KAPESEE-----LEME-----FEDMEN
-----KAPESEE-----LEME-----FEDMEN
-----KAPESEDE-----LEME-----FEDMEN
-----KAPESEE-----LEME-----FEDMES
-----KAPESEE-----LEME-----FEDMEN
-----KAPESEE-----LEME-----FEDMEN
-----KAPESEE-----LEME-----FEDMEN
-----KPPETED-----FDLD-----MENMES
-----KPPETED-----FDLD-----MENMES

```



|                              |                                                       |
|------------------------------|-------------------------------------------------------|
| Larimichthys_crocea          | -----KPPETED-----FDLD-----MENMES                      |
| Lates_calcarifer             | -----KPPESD-----FDLD-----MENMES                       |
| Seriola_lalandi_dorsalis     | -----KPPESD-----FDLD-----MENMES                       |
| Seriola_dumerili             | -----KPPESD-----FDLD-----MENMES                       |
| Zootermopsis_nevadensis      | IKTNMAQQQDLDSLCELQFDQTFVSSPPVSFYQLLEETI-----P--SEENVV |
| Parasteatoda_tepidariorum    | -----TENDDSVTPNTPLRSS-----MREE-----                   |
| Onthophagus_nigriventris     | -----MEARSTRNNQMI-----IQDDVM                          |
| Nicrophorus_vespilloides     | -----MEARNFRSTLTP-----CQDDAR                          |
| Tribolium_castaneum          | -----IEARSSRPTSP-----SQDDPS                           |
| Nilaparvata_lugens           | -----GQERRASTSTPQ-----ATVEEE                          |
| Blattella_germanica          | -----REQRVPPRAE-----LTDDPS                            |
| Nasonia_vitripennis_X1       | -----VEVRNQNPSPSQYRTDKEL--EMV-MQE-SRED-----E--AEGGED  |
| Microplitis_demolitor        | -----IEARNQNTSLSPINDNF--EMAPLED-LRED-----E--QEGDED    |
| Neodiprion_lectei            | -----IEARNQNASHSPQTDKDL--EMETLRN-LQDEEA-----D--QEGSEE |
| Athalia_rosae                | -----IEARHQNASHSPQADKDM--EMATLHD-LREDDV-----DGEGESEE  |
| Orussus_abietinus            | -----VEARNQNRSQHSPTDKDF--EIVTLHE-LREDEA-----E--AEGGED |
| Dufourea_novaeangliae        | -----IEARSONRSNSSQTDHL--ELSTLQD-LQEE-----E--VEGDED    |
| Megachile_rotundata_X1       | -----IDARNQNRSSTSPQIDQHL--GLTALQD-SQDE-----D--AEDEED  |
| Melipona_quadrifasciata      | -----VEARNQNRSNSPQINQHL--ELTTLQD-LQEE-----E--AEGGED   |
| Apis_mellifera_X1            | -----VEARNQNRSNSPQTDKHL--ELATLQD-LQEE-----E--AEGGED   |
| Eufriesea_mexicana_1         | -----VEARNQNRSNSPQIDKHL--ELSSLQD-LQEE-----E--AEGGED   |
| Eufriesea_mexicana_2         | -----VEARNQNRSNSPQIDKHL--ELSSLQD-LQEE-----E--AEGGED   |
| Bombus_terrestris            | -----VEARNQNRSNSPQIDQHL--ELATLQD-LQEE-----E--VEGEED   |
| Bombus_impatiens             | -----VEARNQNRSNSPQIDQHL--ELATLQD-LQEE-----E--VEGEED   |
| Polistes_dominula_X1         | -----IEARNQNMSPQTDKDL--EMTTLQE-FREE-----E--AEGGED     |
| Cephus_cinctus_X1            | -----ADARHQNNSHSPHTDKDL--EISTLQD-LRED-----E--GEGEED   |
| Dinoponera_quadricaps_X2     | -----IEARNQNSSHSPQNDKDL--EMAALQD-LREE-----E--IEGEED   |
| Harpegnathos_saltator_X1     | -----IEARNQNSSHSPQNDKDL--EMAALQD-LREE-----E--VEGEED   |
| Linepithema_humile_X2        | -----IEARNQNSSHSPQ-NEDL--EMVALQD-LREE-----E--LEGGED   |
| Linepithema_humile_X1        | -----IEARNQNSSHSPQ-NEDL--EMVALQD-LREE-----E--LEGGED   |
| Ooceraea_biroi               | -----IEARNQNNSYSSD-NEDL--EMAALQD-LR-E-----E--IEGEDD   |
| Camponotus_floridanus        | -----IEARNQNSSHSPQNDQDL--EMVALQN-LREE-----E--IERGED   |
| Solenopsis_invicta           | -----IEARNQNSSHSPQNDQDL--EMVALQD-LREE-----E--IEGEED   |
| Pogonomyrmex_barbatus_X1     | -----IEARNQNSSHSPQNDQDL--EMVALQD-LREE-----E--TEGEED   |
| Vollenhovia_emeryi_X1        | -----IEARNQNSSHSPQNDQDL--EMVPLQD-LPEE-----E--IEGEEN   |
| Wasmannia_auropunctata       | -----IEARNQNSSHSPQ-NEDL--EMVALQD-LREE-----E--MQG-ED   |
| Cyphomyrmex_costatus         | -----IEARNQNSSHSPQTDQDL--EMVTLLQD-LREE-----E--MEGEED  |
| Trachymyrmex_septentrionalis | -----IEARNQNSSHSPQTDQDL--EMVALQEHRLREE-----E--MEGEED  |
| Atta_colombica               | -----IEARNQNSSHSPQTDQDL--EMVALQEHRLREE-----E--MEGEED  |
| Trachymyrmex_cornetzi        | -----IEARNQNSSHSPQTDQDL--EMVALQEHRLREE-----E--MEGEED  |
| Acromyrmex_echinator         | -----IEARNQNSSHSPQTDQDL--EMVALQERLREE-----E--MEGEED   |
| Atta_cephalotes              | -----IEARNQNSSHSPQTDQDL--EMVALQEHRLREE-----E--MEGEED  |

|                               |                                                          |
|-------------------------------|----------------------------------------------------------|
| Drosophila_melanogaster       | SPIAMVDDQGSHPFSLPSGFASSTPDGQTVMTAFQNPAAQGDISATYVVPDADALD |
| Halyomorpha_halys             | LSSEL--QHGR-----                                         |
| Rhodnius_prolixus             | -----                                                    |
| Cimex_lectularius_X1          | VPEEL--NCDTV-----                                        |
| C.lectularius_X2              | VPEEL--NCDTV-----                                        |
| Cryptotermes_secundus         | -----IFEDT-----                                          |
| Miniopterus_natalensis        | VPL----DRSSH-----                                        |
| Callithrix_jacchus            | VPL----DRSSH-----                                        |
| Heterocephalus_glaber_X1      | VPL----DRSSH-----                                        |
| Dasypus_novemcinctus          | VPL----DRSSH-----                                        |
| Tupaia_chinensis_X2           | VPL----DQSSH-----                                        |
| Homo_sapiens_X1               | VPL----DRSSH-----                                        |
| Pongo_abelii_2                | VPL----DRSSH-----                                        |
| Pan_troglodytes_X2            | VPL----DRSSH-----                                        |
| Boleophthalmus_pectinirostris | IPL----DPSSY-----                                        |
| Larimichthys_crocea_X2        | IPL----DPSSY-----                                        |
| Larimichthys_crocea           | IPL----DPSSY-----                                        |
| Lates_calcarifer              | IPL----DPSSY-----                                        |
| Seriola_lalandi_dorsalis      | IPL----DPSSY-----                                        |
| Seriola_dumerili              | IPL----DPSSY-----                                        |
| Zootermopsis_nevadensis       | QHQRADDESIVF-----                                        |
| Parasteatoda_tepidariorum     | -----ESNDH-----                                          |
| Onthophagus_nigriventris      | MPLRLTKLEEEI-----                                        |
| Nicrophorus_vespilloides      | TPLRSNQDDENM-----                                        |
| Tribolium_castaneum           | TPLR---IAGDH-----                                        |
| Nilaparvata_lugens            | TPLRVTRDVEDF-----                                        |
| Blattella_germanica           | TPLRETRDVEDF-----                                        |

|                              |                   |
|------------------------------|-------------------|
| Nasonia vitripennis_X1       | SPLRQ--DFGDF----- |
| Microplitis demolitor        | LPLRE--DFGDF----- |
| Neodiprion lecontei          | SPLRE--DFGDF----- |
| Athalia rosae                | SPLRQ--DFGDF----- |
| Orussus abietinus            | SPLRR--DFGDF----- |
| Dufourea novaeangliae        | SPLRQ--DFGDF----- |
| Megachile rotundata_X1       | SPLRQ--HFGDF----- |
| Melipona quadrifasciata      | SPLRQ--DFGDF----- |
| Apis mellifera_X1            | SPLRQ--DFGDF----- |
| Eufriesea mexicana_1         | SPLRQ--DFGDF----- |
| Eufriesea mexicana_2         | SPLRQ--DFGDF----- |
| Bombus terrestris            | SPLRQ--DFGDF----- |
| Bombus impatiens             | SPLRQ--DFGDF----- |
| Polistes dominula_X1         | SPLRQ--DFGDF----- |
| Cephus cinctus_X1            | SPLRQ--DFGDF----- |
| Dinoponera quadriceps_X2     | SPLRQ--DFGDF----- |
| Harpegnathos saltator_X1     | SPLRQ--DFGDF----- |
| Linepithema humile_X2        | SPLRQ--DFGDF----- |
| Linepithema humile_X1        | SPLRQ--DFGDF----- |
| Ooceraea biroi               | SPLRQ--DFGDF----- |
| Camponotus floridanus        | SPLRE--DFGDF----- |
| Solenopsis invicta           | SPLRQ--DFGDF----- |
| Pogonomyrmex barbatus_X1     | SPLRQ--DFGDF----- |
| Vollenhovia emeryi_X1        | SPLRQ--DFGDF----- |
| Wasmannia auropunctata       | SPLRQ--DFGDF----- |
| Cyphomyrmex costatus         | SPLRQ--DFGDF----- |
| Trachymyrmex septentrionalis | SPLRQ--DFGDF----- |
| Atta colombica               | SPLRQ--DFGDF----- |
| Trachymyrmex cornetzi        | SPLRQ--DFGDF----- |
| Acromyrmex echinator         | SPLRQ--DFDDF----- |
| Atta cephalotes              | SPLRQ--DFGDF----- |

|                               |                                                             |
|-------------------------------|-------------------------------------------------------------|
| Drosophila melanogaster       | GDRGYEIIDPSPKCAELPTSRSGSTGGGKLSGEQHLLPRKGRQPTIMSSSMPDDVIGSS |
| Halyomorpha halys             | -----ELT                                                    |
| Rhodnius prolixus             | -----                                                       |
| Cimex lectularius_X1          | -----ASC                                                    |
| C. lectularius_X2             | -----ASC                                                    |
| Cryptotermes secundus         | -----S-C                                                    |
| Miniopterus natalensis        | -----S--                                                    |
| Callithrix jacchus            | -----C-Q                                                    |
| Heterocephalus glaber_X1      | -----C-Q                                                    |
| Dasypus novemcinctus          | -----S-Q                                                    |
| Tupaia chinensis_X2           | -----C-Q                                                    |
| Homo sapiens_X1               | -----C-Q                                                    |
| Pongo abelii_2                | -----C-Q                                                    |
| Pan troglodytes_X2            | -----C-Q                                                    |
| Boleophthalmus pectinirostris | -----S-H                                                    |
| Larimichthys crocea_X2        | -----S-Q                                                    |
| Larimichthys crocea           | -----S-Q                                                    |
| Lates calcarifer              | -----S-Q                                                    |
| Seriola lalandi dorsalis      | -----S-H                                                    |
| Seriola dumerili              | -----S-H                                                    |
| Zootermopsis nevadensis       | -----PGN                                                    |
| Parasteatoda tepidariorum     | -----DYS                                                    |
| Onthophagus nigriventris      | -----Y-P                                                    |
| Nicrophorus vespilloides      | -----S-S                                                    |
| Tribolium castaneum           | -----DVN                                                    |
| Nilaparvata lugens            | -----SLS                                                    |
| Blattella germanica           | -----SLG                                                    |
| Nasonia vitripennis_X1        | -----S-S                                                    |
| Microplitis demolitor         | -----A-T                                                    |
| Neodiprion lecontei           | -----A-S                                                    |
| Athalia rosae                 | -----A-S                                                    |
| Orussus abietinus             | -----A-S                                                    |
| Dufourea novaeangliae         | -----E-S                                                    |
| Megachile rotundata_X1        | -----A-S                                                    |
| Melipona quadrifasciata       | -----A-S                                                    |
| Apis mellifera_X1             | -----A-S                                                    |
| Eufriesea mexicana_1          | -----APS                                                    |
| Eufriesea mexicana_2          | -----APS                                                    |

|                              |          |
|------------------------------|----------|
| Bombus_terrestris            | -----A-S |
| Bombus_impatiens             | -----A-S |
| Polistes_dominula_X1         | -----A-S |
| Cephus_cinctus_X1            | -----A-N |
| Dinoponera_quadriceps_X2     | -----A-S |
| Harpegnathos_saltator_X1     | -----A-S |
| Linepithema_humile_X2        | -----A-S |
| Linepithema_humile_X1        | -----A-S |
| Ooceraea_biroi               | -----A-S |
| Camponotus_floridanus        | -----A-S |
| Solenopsis_invicta           | -----A-S |
| Pogonomyrmex_barbatus_X1     | -----A-S |
| Vollenhovia_emeryi_X1        | -----A-S |
| Wasmannia_auropunctata       | -----A-S |
| Cyphomyrmex_costatus         | -----A-S |
| Trachymyrmex_septentrionalis | -----A-S |
| Atta_colombica               | -----A-S |
| Trachymyrmex_cornetzi        | -----A-S |
| Acromyrmex_echinator         | -----A-S |
| Atta_cephalotes              | -----A-S |

|                               |                                                               |
|-------------------------------|---------------------------------------------------------------|
| Drosophila_melanogaster       | LQPSTASAASSNASSHTGRPSLKKTVADSVRNKANFINRHFLFNHKRTGSNASHKSNASNA |
| Halyomorpha_halys             | ANTA-----                                                     |
| Rhodnius_prolixus             | -----                                                         |
| Cimex_lectularius_X1          | PSPT-----                                                     |
| C._lectularius_X2             | PSPT-----                                                     |
| Cryptotermes_secundus         | FQSC-----                                                     |
| Miniopterus_natalensis        | -----                                                         |
| Callithrix_jacchus            | REEA-----                                                     |
| Heterocephalus_glaber_X1      | REEA-----                                                     |
| Dasypus_noveboracensis        | RDEA-----                                                     |
| Tupaia_chinensis_X2           | REEV-----                                                     |
| Homo_sapiens_X1               | REEA-----                                                     |
| Pongo_abelii_2                | REEA-----                                                     |
| Pan_troglodytes_X2            | REEA-----                                                     |
| Boleophthalmus_pectinirostris | REGQ-----                                                     |
| Larimichthys_crocea_X2        | REQC-----                                                     |
| Larimichthys_crocea           | REQC-----                                                     |
| Lates_calcarifer              | REQC-----                                                     |
| Seriola_lalandi_dorsalis      | REQC-----                                                     |
| Seriola_dumerili              | REQC-----                                                     |
| Zootermopsis_nevadensis       | HQQQ--SVRDPNSL-----QLGMKHPSSVT--VP                            |
| Parasteatoda_tepidariorum     | YFPS-----                                                     |
| Onthophagus_nigrirostris      | LNSC-----                                                     |
| Nicrophorus_vespilloides      | IASS-----                                                     |
| Tribolium_castaneum           | FSLN-----                                                     |
| Nilaparvata_lugens            | DDED-----                                                     |
| Blattella_germanica           | GGSE-----                                                     |
| Nasonia_vitripennis_X1        | FEPMT--RRKNGSSG-----HFGMEPFDTNSKSPT                           |
| Microplitis_demolitor         | VEPS---CFKNSPDI-----RYDLKPYGDNSK-IP                           |
| Neodiprion_lecontei           | FEPSPGPNISIKISSNP-----IYGATTRNDNSK-VS                         |
| Athalia_rosae                 | FEPAGPNISIKISSNP-----IYGATTRNENSK-VS                          |
| Orussus_abietinus             | FEPT---SIKNSSTP-----RYGSELYGENSK-IP                           |
| Dufourea_novaeangliae         | FEPS---SIKNSFSP-----HYRMDSYGENSK-TT                           |
| Megachile_rotundata_X1        | FEPS---IVKNSFSP-----RYRADSYPGENSK-AT                          |
| Melipona_quadrfasciata        | FEP---SIKNSFSP-----RFRMDSYGENSK-TT                            |
| Apis_mellifera_X1             | FEPA---SIKNSFGS-----RFRMDSYGENSK-TT                           |
| Eufriesea_mexicana_1          | FEPS---SIKNSFSP-----RYRMDSYGENSK-AT                           |
| Eufriesea_mexicana_2          | FEPS---SIKNSFSP-----RYRMDSYGENSK-AT                           |
| Bombus_terrestris             | FEPN---SIKNSFSP-----RFRMDSYGENSK-TN                           |
| Bombus_impatiens              | FEPN---SIKNSFSP-----RFRMDSYGENSK-TN                           |
| Polistes_dominula_X1          | FEPT---SIKNSLSP-----RY-TEPYGENSKTTT                           |
| Cephus_cinctus_X1             | FEPT---SLKNSNS-----RYVTEPYGENSK-VS                            |
| Dinoponera_quadriceps_X2      | FEPT---SIKDDTSP-----RY-INAYGENSK-AV                           |
| Harpegnathos_saltator_X1      | FEPA---SIENNTSP-----RY-TNTYGENSK-VA                           |
| Linepithema_humile_X2         | FEPC---NIKNTLSP-----RYGINSYGETSN-AT                           |
| Linepithema_humile_X1         | FEPC---NIKNTLSP-----RYGINSYGETSN-AT                           |
| Ooceraea_biroi                | FEPS---SIKNTLSP-----RYGIDSYGETSK-TT                           |
| Camponotus_floridanus         | FEPC---SIKNNLSP-----HYGANSYGETS---T                           |
| Solenopsis_invicta            | FEPR---SIKNNLSP-----QYEVDSFGETSK-AT                           |

Pogonomyrmex\_barbatus\_X1  
Vollenhovia\_emeryi\_X1  
Wasmannia\_auropunctata  
Cyphomyrmex\_costatus  
Trachymyrmex\_septentrionalis  
Atta\_colombica  
Trachymyrmex\_cornetzi  
Acromyrmex\_echinatior  
Atta\_cephalotes

FEPC---SIKNNLSS-----RYAIGSYGETSK-AT  
FEPR---SIKNNLSP-----RYGADSYGETSK-AI  
FEPR---SIRNNLSP-----RYGADSYGESSK-AT  
FEPR---SIKNTISP-----RYGADSYGETSK-AT  
FEPR---S-KNTLSP-----RYGADSYGETSK-AT  
FEPR---S-KNTLSP-----RYGADSYGETSK-A-  
FEPR---S-KNTLSP-----RYGADSYGETSK-AT  
FEPR---S-KNTLSP-----RYGADSYGETSK-AT  
FEPR---S-KNTLSP-----RYGADSYGETSK-A-

Drosophila\_melanogaster  
Halyomorpha\_halys  
Rhodnius\_prolixus  
Cimex\_lectularius\_X1  
C.\_lectularius\_X2  
Cryptotermes\_secundus  
Miniopterus\_natalensis  
Callithrix\_jacchus  
Heterocephalus\_glaber\_X1  
Dasypus\_novemcinctus  
Tupaia\_chinensis\_X2  
Homo\_sapiens\_X1  
Pongo\_abelii\_2  
Pan\_troglodytes\_X2  
Boleophthalmus\_pectinirostris  
Larimichthys\_crocea\_X2  
Larimichthys\_crocea  
Lates\_calcarifer  
Seriola\_lalandi\_dorsalis  
Seriola\_dumerili  
Zootermopsis\_nevadensis  
Parasteatoda\_tepidariorum  
Onthophagus\_nigriventris  
Nicrophorus\_vespilloides  
Tribolium\_castaneum  
Nilaparvata\_lugens  
Blattella\_germanica  
Nasonia\_vitripennis\_X1  
Microplitis\_demolitor  
Neodiprion\_lecontei  
Athalia\_rosae  
Orussus\_abietinus  
Dufourea\_novaeangliae  
Megachile\_rotundata\_X1  
Melipona\_quadrifasciata  
Apis\_mellifera\_X1  
Eufriesea\_mexicana\_1  
Eufriesea\_mexicana\_2  
Bombus\_terrestris  
Bombus\_impatiens  
Polistes\_dominula\_X1  
Cephus\_cinctus\_X1  
Dinoponera\_quadriceps\_X2  
Harpegnathos\_saltator\_X1  
Linepithema\_humile\_X2  
Linepithema\_humile\_X1  
Ooceraea\_biroi  
Camponotus\_floridanus  
Solenopsis\_invicta  
Pogonomyrmex\_barbatus\_X1  
Vollenhovia\_emeryi\_X1  
Wasmannia\_auropunctata  
Cyphomyrmex\_costatus  
Trachymyrmex\_septentrionalis  
Atta\_colombica  
Trachymyrmex\_cornetzi  
Acromyrmex\_echinatior  
Atta\_cephalotes

PSTSSNTNLTSHPVAMGNLGTIES-----GGSGSAGSYTGTPRFYTPSATPGGGSGMA  
--S--FHTANENTAL-----YGPI-----  
-----  
--N-----LMD-----  
-----NLMD-----  
-----ERTERFDSPL-----LSGEFNSLVPEKRTSASVN  
--Q--REDDGGSSLGRK--RSYED-----  
-----GGRDGGSSLGLK--RSYDE-----  
-----GGREGGSSLGIK--RNYEE-----  
-----GGRDGGSSLGLK--RNYEE-----  
-----GGRDGGSSLGLK--RNYEE-----  
-----GGRDGGSSLGFK--RSYEE-----  
-----GGRDGGSSLGFK--RSYEE-----  
-----GGRDGGSSLGFK--RSYEE-----  
--S--LDRDEAASMGLL--GSYEE-----  
-----LDRDEAASMGLR--GSYEE-----  
-----LDRDEAASMGLR--GSYEE-----  
-----LDRDEAASMGLR--GSYEE-----  
-----LDRDEAASMGLR--GSYEE-----  
P-N--RHEISDSYVLPEHLPGFPETEHVLYGPGSDFTLQHNSFETAPLKRTSGTGSSVIR  
-----ATMLPEE-----DEAEEIVNGGELVEATIS-SVDELRTVHVNSN-----  
-----ADDSEV-----EDDLVGSP-----  
-----DSSEE-----  
-----SDDSN-----DEFET-----  
--D--YEPHLPAPAPAP-----ATDTKVSNGSATAPTP  
-----EEEDDLDPADVE--VGYP-----HYHTMSVP-----  
SLALGFLDLNSSKAPLK--AGFDD----FDGVSVGLAS-SKDTLNLFFAEDSVKPAKN  
A-S--FHDLNSSKIPLK--AGFDD----FDGVSVGLCS-SKDTLNLFFAEDSLKSVKN  
P-N--FHEFNSSKVPLK--ADFDD----FEGASMESLRS-SRDTLDLPFAEDSLKSVKN  
P-N--FHEFNSSKVPLK--ADFED----FEGASMESLRS-SRDTLDLPFAEDSLKSVKN  
S-A--FHDLPSSKIPLK--AGFED----FDDVSAESMSS-SKDTLNLFFAEDSLKSVKS  
NMN--SHMNSSNVPLK--AGFDD----FDGVSAGSIAS-GKDTLNLFFVEDSLKSVKS  
A-T--CQDFNSSNVPLK--AVFDD----FDGVSADSVIS-GKDALNLFFVEDSFKSVKS  
T-N--CHDMNSSNVPLK--AGFDD----FDGVSADSIAS-GKDVNLNLPFFVEDSLKSVKS  
P-N--CHDMNSSNVPLK--AGFDD----FDGVSADSIASIAKDALNLNLPFFVEDSLKSVKS  
S-N--CHDMNSSNVPLK--AGFDD----FDGVSADSVAS-GKDALNLNLPFFVEDSLKSVKS  
S-N--CHDMNSSNVPLK--AGFDD----FDGVSADSVAS-GKDALNLNLPFFVEDSLKSVKS  
S-N--CHDMNSSNVPLK--AGFDD----FDGVSADSIAS-GKDVNLNLPFFVEDSLKSVKS  
S-N--CHDMNSSNVPLK--AGFDD----FDGVSADSIAS-GKDVNLNLPFFVEDSLKSVKS  
T-N--FHDLNLSKIPLK--AGFDD----FDGISGDSLAS-SKDTLNLNLPFFVEDSLKSVKN  
R-T--FHDNLSSKVPLK--AGFDD----FDGVSGLSLAS-SKDTLNLNLPFAEESLNSVRN  
S-S--FHDNMSSKVPLK--AGFDD----FDGVSGLSLAS-SKDTLNLNLPFFVEDSLKSVKS  
S-T--FHDNMSSKVPLK--AGFDD----FDGISGDSLAS-SKDTLNLNLPFFVEDSLKSVKS  
S-N--FHDMNSSEVP-K--AGFDE----FGGISGDSLVS-N-----  
S-N--FHDMNSSEVP-K--AGFDE----FGGISGDSLVS-SKDTLNSPYVEGSLKSVRS  
P-D--FHDMNCSKIPLK--AGFED----FDGVSGLSL-S-SKDTLNLNLPFFVEDSLKSVKS  
S-N--FHDMNSSKVP-K--AGFDE----FVGVSGLSLVS-SKDTLNSPFFIEGSLKSVRS  
S-N--FHDMNSTKVP-K--AGFDE----FGGISGDSLVS-SKDTLNSPFFV-GLSKSV-S  
S-N--FHDMNSIKVP-K--AGFDE----FVGVSGLSLVS-SKDTLNSPFFVEGSLKSVRS  
S-N--FHDMNSTKVP-K--AGFDE----FGGISGDSLVS-SKDTLNSPFFVEGSLKSVRS  
S-N--FHDMSSIKVP-K--AGFDE----FGGISGDSLVS-SKDTLNSPFFVEGSLKSVRS  
S-N--FHDMNSIKVP-K--AGFDE----FGGISGDSLVS-SKDTLNLNLPFFVEGSLKSIRS  
S-N--FHDMNSIKVP-K--AGFDE----FGGISGDSLVS-SKDTLNSPFFVEGSLKSVRS  
S-N--FHDMNSIKVP-K--AGFDE----FGGISGDSLVS-SKDTLNSPFFVEGSLKSVRS  
S-N--FHDMNSIKVP-K--AGFDE----FGGISGDSLVS-SKDTLNSPFFVEGSLKSVRS  
S-N--FHDMNSIKVP-K--AGFDE----FGGISGDSLVS-SKDTLNSPFFVEGSLKSVRS

|                               |                                                               |
|-------------------------------|---------------------------------------------------------------|
| Drosophila_melanogaster       | ISDNPNYRLLEDSEIASEQATILTTSSPNPNYEMMHPPTSLVSTNPNYMPMNETPVQMAGV |
| Halyomorpha_halys             | -----                                                         |
| Rhodnius_prolixus             | -----                                                         |
| Cimex_lectularius_X1          | -----                                                         |
| C._lectularius_X2             | -----                                                         |
| Cryptotermes_secundus         | SNMETLPNNSRSSIA-----                                          |
| Miniopterus_natalensis        | -----                                                         |
| Callithrix_jacchus            | -----                                                         |
| Heterocephalus_glaber_X1      | -----                                                         |
| Dasypus_novemcinctus          | -----                                                         |
| Tupaia_chinensis_X2           | -----                                                         |
| Homo_sapiens_X1               | -----                                                         |
| Pongo_abelii_2                | -----                                                         |
| Pan_troglodytes_X2            | -----                                                         |
| Boleophthalmus_pectinirostris | -----                                                         |
| Larimichthys_crocea_X2        | -----                                                         |
| Larimichthys_crocea           | -----                                                         |
| Lates_calcarifer              | -----                                                         |
| Seriola_lalandi_dorsalis      | -----                                                         |
| Seriola_dumerili              | -----                                                         |
| Zootermopsis_nevadensis       | KASQLIPQTGYGLLDNEYSQPENIDPTIPSQVTSDDSCSKILFAGLG--DGYPDENILPK  |
| Parasteatoda_tepidariorum     | -----DG-----                                                  |
| Onthophagus_nigriiventris     | -----                                                         |
| Nicrophorus_vespilloides      | -----                                                         |
| Tribolium_castaneum           | -----                                                         |
| Nilaparvata_lugens            | NGFIRRP-----                                                  |
| Blattella_germanica           | -----RKLSTPPNGIV-----                                         |
| Nasonia_vitripennis_X1        | SPFAQKKSSSKGNVS--QSSAGKSSL-SPQSPSIIATTGNLGSKPS--PSLV-----SS   |
| Microplitis_demolitor         | SPSIKNNSTNRRNIS---PLSSKNSLSPQ-NKR---NQIILNRNG--QNK-----SV     |
| Neodiprion_lecontei           | SPFVDKRNNSRVNSTGDNVSLGKNSI-NPN-NVV---KRNFSSESPR--F-----SK     |
| Athalia_rosae                 | SPFVEKKNNSRGNLS--DGSIGK-TL-SPG-SIA---RKNFLETPR--F-----ST      |
| Orussus_abietinus             | SPFSERKTPSRNAS--LASTA-KST-SPR-SMT---KSAFFESPE--A-----PK       |
| Dufourea_novaeangliae         | SPFMNAKSSSRSNIS--QLSVDNKSI-SPRNAG---KRSYLNSPN--S-----SK       |
| Megachile_rotundata_X1        | SPFATAKSVSRNLS--QLSTGNRSA-SPKSTG---KRSFLSSPN--S-----SR        |
| Melipona_quadrifasciata       | SPFINAKSISRNLNLS--QLSISNRSA-SPKNHSG---RRSFLSSPN--S-----SK     |
| Apis_mellifera_X1             | SPFINAKSASRNLS--QLSTNRSATSPKNPSG---KRSFLGSPN--S-----SK        |
| Eufriesea_mexicana_1          | SPFINAKSASRNLS--QLSISNKSG-SPKNPS---KRSFLSSPN--S-----SK        |
| Eufriesea_mexicana_2          | SPFINAKSASRNLS--QLSISNKSG-SPKNPS---KRSFLSSPN--S-----SK        |
| Bombus_terrestris             | SPFINAKSTSRNLNLS--QLSISNRSG-SPKNPS---KRSFLSSPN--S-----SK      |
| Bombus_impatiens              | SPFINAKSTSRNLNLS--QLSISNRSG-SPKNPS---KRSFLSSPN--S-----SK      |
| Polistes_dominula_X1          | SPFIHAKSTSKGIDN--QTSTG-RAT-SLQ-NLI---KQHIQQQQR--TQEDSPISIKSK  |
| Cephus_cinctus_X1             | SPFAEKRTSRGNIS--QISVG-KSL-TPQ-TGN---KRVFLESPPG--L-----SR      |
| Dinoponera_quadricaps_X2      | SPFIHNKSTSRN-----SE-SLV-----                                  |
| Harpegnathos_saltator_X1      | SPFIQNKSTSRSNVS--YVSLG-KSA-SPQ-SLV---KRNFLDSPN--P-----SC      |
| Linepithema_humile_X2         | -----                                                         |
| Linepithema_humile_X1         | SPFIYKKSTSRSNIS--QASLG-KSV-SPQ-GLV---RQNFLDSPN--S-----SK      |
| Ooceraea_biroi                | SPFIHTKSASRNVS--QASLA-KSA-SPQ-SKV---KQNFLDSPN--L-----SK       |
| Camponotus_floridanus         | SPFIYKKSTSRSNVS--QGSVL-KSG-SPQ-SLV---KRYFLDSPN--L-----PK      |
| Solenopsis_invicta            | SPFIYKKSTSRGNVS--QSSLG-KSA-SPQ-SLV---KRNFLDSPN--P-----SK      |
| Pogonomyrmex_barbatus_X1      | SPFIYKKSTSRSNIS--QSSLG-KPG-SPPGSLV---KRSFLDSPN--P-----SK      |
| Vollenhovia_emeryi_X1         | SPFIYKKSTSRSNVS--QGSGL-KPA-SPQ-SLV---KRHFFDSPN--L-----SK      |
| Wasmannia_auropunctata        | SPFIYKKSTSRSNVS--QGSGL-KPG-SPQ-SLV---KRNFLDSPN--P-----SK      |
| Cyphomyrmex_costatus          | SPFIYKKSTSRSNVS--QGSGL-KPG-SPQ-SLV---KRNFLDSPN--P-----SK      |
| Trachymyrmex_septentrionalis  | SPFIYKKSTSRSNVS--QGSGL-KSG-SPQ-SLV---KRNFLDSPN--P-----SK      |
| Atta_colombica                | SPFIYKKSTSRSNVS--QGSGL-KSG-SPQ-SLV---KRNFLDSPN--P-----SK      |
| Trachymyrmex_cornetzi         | SPFIYKKSTSRSNVS--QGSGL-KSG-SPQ-SLV---KRNFLDSPN--P-----SK      |
| Acromyrmex_echinatior         | SPFIYKKSTSRSNVS--QGSGL-KSG-SPQ-SLV---KRNFLDSPN--P-----SK      |
| Atta_cephalotes               | SPFIYKKSTSRSNVS--QGSGL-KSG-SPQ-SLV---KRNFLDSPN--P-----SK      |

|                          |                                                        |
|--------------------------|--------------------------------------------------------|
| Drosophila_melanogaster  | TISHNPNYQPMQAPLNARQSQSSSDEDEDEDEDDDDVDDHVEHIKMERMLSRPR |
| Halyomorpha_halys        | -----                                                  |
| Rhodnius_prolixus        | -----                                                  |
| Cimex_lectularius_X1     | -----                                                  |
| C._lectularius_X2        | -----                                                  |
| Cryptotermes_secundus    | ----EPHYLMCKRTS-----                                   |
| Miniopterus_natalensis   | -----HISYTHMN-----                                     |
| Callithrix_jacchus       | -----HIPYTHMN-----                                     |
| Heterocephalus_glaber_X1 | -----HIPYTHMN-----                                     |
| Dasypus_novemcinctus     | -----HIPYTHMN-----                                     |
| Tupaia_chinensis_X2      | -----HIPYTHMN-----                                     |

|                               |                                                              |
|-------------------------------|--------------------------------------------------------------|
| Homo_sapiens_X1               | -----HIPYTHMN-----                                           |
| Pongo_abelii_2                | -----HIPYTHMN-----                                           |
| Pan_troglodytes_X2            | -----HIPYTHMN-----                                           |
| Boleophthalmus_pectinirostris | -----HHMPFTHMN-----                                          |
| Larimichthys_crocea_X2        | -----HHIPFTHMN-----                                          |
| Larimichthys_crocea           | -----HHIPFTHMN-----                                          |
| Lates_calcarifer              | -----HHIPFTHMN-----                                          |
| Seriola_lalandi_dorsalis      | -----HHIPFTHMN-----                                          |
| Seriola_dumerili              | -----HHIPFTHMN-----                                          |
| Zootermopsis_nevadensis       | THSEECDLHSSVS AVRTQDCAP-----SENNSVEGDTR-LQAQGSKCPVATVSSGN    |
| Parasteatoda_tepidarium       | SKGVSVNYS DSGSKGSKISTLSN-----                                |
| Onthophagus_nigriiventris     | -----HMEFSSYPKVQKDTT-----                                    |
| Nicrophorus_vespilloides      | -----EELEPDTNIEFITY-----                                     |
| Tribolium_castaneum           | -----DAETHIRFSPIPVENKDG-----                                 |
| Nilaparvata_lugens            | -----                                                        |
| Blattella_germanica           | -----GNGSAATS-----                                           |
| Nasonia_vitripennis_X1        | TRS-DPEYENRSPEAV---DQL-----QQQPPTRDVAS-LRVSFPSMDAIDSDET      |
| Microplitis_demolitor         | HNIDLDYENQSTELM---SNA-----EM---KDINS-TQLDYSSLDNVDVTISV       |
| Neodiprion_lecontei           | IKSEDPDYENKSPEV-FV-TSGD-----TI---KNTNV-HRVEFPSIDGID-DKNI     |
| Athalia_rosae                 | IKTEDPDYENKIPEVVLSTSGD-----QI---KDSNI-RRIEFPSIDVE-DKNI       |
| Orussus_abietinus             | PRG-NSDYENRSPERV---SL-----NA---KNAST--RIEIVDINDVVDDQK        |
| Dufourea_novaeangliae         | I-A-NPDYENGSP EIL---SAA-----EK---KETVP-LRVDFPSMDAIGIDHEI     |
| Megachile_rotundata_X1        | LAN-LPDYENGSP EIL---PAV-----NK---RETMP-LRVDFPSMDAIDVDNRL     |
| Melipona_quadri-fasciata      | L-I-NPDYENGSP EIL---LAA-----EK---RDTVP-LRVDFPSAID-IDV----    |
| Apis_mellifera_X1             | IAA-NPDYENGSP EIL---SAAA-----EK---RETV-LRLDFPSIDAIDIDNGM     |
| Eufriesea_mexicana_1          | L-A-NPDYENGSP EIL---AVA-----EK---RETV-LRVDFPSIDAIDIDNGM      |
| Eufriesea_mexicana_2          | L-A-NPDYENGSP EIL---AVA-----EK---RETV-LRVDFPSIDAIDIDNGM      |
| Bombus_terrestris             | L-V-NPDYENGSP EIL---SAA-----EK---REAVP-LRVDFPSMDTINIDNGM     |
| Bombus_impatiens              | L-V-NPDYENGSP EIL---SAA-----EK---REAVP-LRVDFPSMDTINIDNGM     |
| Polistes_dominula_X1          | SKK-NPDYENSSPMIL---ANY-----ER---N----FSFPSLSLNTLEIDVDI       |
| Cephus_cinctus_X1             | TRY-APDYENHSPEFI---NDE-----NN---KDAIP-LRIDFPSMEAI DDDEPE     |
| Dinoponera_quadriciceps_X2    | -----                                                        |
| Harpegnathos_saltator_X1      | KPRGNPDYENRSPEIM---LGL-----EK---KETAP-MHVNFP SMDAIDIDING     |
| Linepithema_humile_X2         | -----                                                        |
| Linepithema_humile_X1         | PQS-DPDYEN-SPEIM---SGL-----EK---K-ISP-LHIEFASMDATDIEING      |
| Ooceraea_biroi                | SRNLDPDYENKSSEII---SGS-----AK---KETAP-LHVKFPSVDEM DIEING     |
| Camponotus_floridanus         | SRG-DPDYENRSPE TI---LAI-----EK---REITTPHVEFPSVDVMDIQING      |
| Solenopsis_invicta            | LRD-DPDYENRSLEII---SGI-----EK---KEIIS-LHVEFPSVDVMDIQING      |
| Pogonomyrmex_barbatus_X1      | FRD-DPDYENRSPEIM---SSI-----EK---KEITS-LHVEFPSMDVIDIQING      |
| Vollenhovia_emeryi_X1         | FRD-DPDYENRSPEIM---SGI-----EK---KEITS-LHVEFPSVDVMDIQING      |
| Wasmannia_auropunctata        | RRD-DPDYENRSPEIM---SGV-----EK---KEITS-LHVEFPSVDVMDIQING      |
| Cyphomyrmex_costatus          | LRD-DPDYENRSPEIM---SGI-----EK---KEITS-LHVEFPSVDVMDIQING      |
| Trachymyrmex_septentrionalis  | LQD-DPDYENRSPEIM---SGI-----EK---REITS-LHVEFPSVDV---QING      |
| Atta_colombica                | LQD-DPDYENRNPEIM---SGI-----EK---REITS-LHVEFPSVDV---QING      |
| Trachymyrmex_cornetzi         | LQD-DPDYENRSPEIM---SGI-----EK---REITS-LHVEFPSVDV---QING      |
| Acromyrmex_echinatior         | LQD-DPDYENRSPEIM---SGI-----EK---REITS-LHVEFPSMDV---QVNG      |
| Atta_cephalotes               | LQD-DPDYENRSPEIM---SGI-----EK---REITS-LHVEFPSVDV---QING      |
| Drosophila_melanogaster       | QRALPSKTQPPRSRSVSQTRKSPTNPNSGIGATGAGNRSNLLKENWLRPASTPRPPPPNG |
| Halyomorpha_halys             | -----                                                        |
| Rhodnius_prolixus             | -----                                                        |
| Cimex_lectularius_X1          | -----                                                        |
| C._lectularius_X2             | -----                                                        |
| Cryptotermes_secundus         | -----RFNADE                                                  |
| Miniopterus_natalensis        | -----GGKKNG                                                  |
| Callithrix_jacchus            | -----GGKKNG                                                  |
| Heterocephalus_glaber_X1      | -----GGKKNG                                                  |
| Dasypus_novemcinctus          | -----GGKKNG                                                  |
| Tupaia_chinensis_X2           | -----GGKKNG                                                  |
| Homo_sapiens_X1               | -----GGKKNG                                                  |
| Pongo_abelii_2                | -----GGKKNG                                                  |
| Pan_troglodytes_X2            | -----GGKKNG                                                  |
| Boleophthalmus_pectinirostris | -----GGKSNG                                                  |
| Larimichthys_crocea_X2        | -----GGKTNG                                                  |
| Larimichthys_crocea           | -----GGKTNG                                                  |
| Lates_calcarifer              | -----GGKTNG                                                  |
| Seriola_lalandi_dorsalis      | -----GGKTNG                                                  |
| Seriola_dumerili              | -----GGKTNG                                                  |
| Zootermopsis_nevadensis       | RAIP-----SSKDSFKGDDGN-----KSKPRFP-----NGMVNG                 |
| Parasteatoda_tepidarium       | -----GSIANG                                                  |

|                              |                                                  |
|------------------------------|--------------------------------------------------|
| Onthophagus_nigriventris     | -----TGTANG                                      |
| Nicrophorus_vespilloides     | -----TSTANG                                      |
| Tribolium_castaneum          | -----ITTANG                                      |
| Nilaparvata_lugens           | -----PAANGN                                      |
| Blattella_germanica          | -----PTAANG                                      |
| Nasonia_vitripennis_X1       | IPETTSSIVVDSNSSSATLPsAKQQ-----YAN--KSGEQQAAPLNNG |
| Microplitis_demolitor        | -----QEAEPOS--QTD-----YLE--KC-----ESLNNG         |
| Neodiprion_lecontei          | -----NDNGGNKS-KVD-----YKSNNKQ-----EGLNNG         |
| Athalia_rosae                | -----NEIGGNKS-KVD-----YKS--KP-----ETLNNG         |
| Orussus_abietinus            | -----EKS-----PVE-----YVN--RS-----ETLNNG          |
| Dufourea_novaeangliae        | -----EKKDTI-P-ITD-----YVN--KP-----ETLNNG         |
| Megachile_rotundata_X1       | -----EKKETF-S-DSD-----FTN--KS-----ENLNNG         |
| Melipona_quadrfasciata       | -----ETNEPL-S-PVE-----YVN--KP-----EALNNG         |
| Apis_mellifera_X1            | -----ERKEALSS-PVE-----YVN--KP-----ETLNNG         |
| Eufriesea_mexicana_1         | -----EKKETL-S-PVE-----YVN--KP-----ETLNNG         |
| Eufriesea_mexicana_2         | -----EKKETL-S-PVE-----YVN--KP-----ETLNNG         |
| Bombus_terrestris            | -----EKKEMK-S-PVE-----YVN--KP-----ETLNNG         |
| Bombus_impatiens             | -----EKKEMK-S-PVE-----YVN--KP-----ETLNNG         |
| Polistes_dominula_X1         | -----EGKDRRHSPRVE-----YMN--EP-----ETLNNG         |
| Cephus_cinctus_X1            | -----VRKDIKKA-QAE-----YMN--KP-----ETLNNG         |
| Dinoponera_quadriceps_X2     | -----                                            |
| Harpegnathos_saltator_X1     | -----DKSESks--MGG-----YVN--KP-----ETLNNG         |
| Linepithema_humile_X2        | -----                                            |
| Linepithema_humile_X1        | -----DKKDSKY--TAD-----YVN--KP-----ETLNNG         |
| Ooceraea_biroi               | -----EKNESKH--AGE-----YVN--KP-----ETLNNG         |
| Camponotus_floridanus        | -----DKKETK--TTD-----YVN--KS-----ETLNNG          |
| Solenopsis_invicta           | -----NKTENNKKHTGD-----YMN--KS-----ETLNNG         |
| Pogonomyrmex_barbatus_X1     | -----DKKESNKH-MSD-----YMN--KS-----ETLNNG         |
| Vollenhovia_emeryi_X1        | -----DKTENNKR-TGD-----YMN--KS-----ETLNNG         |
| Wasmannia_auropunctata       | -----DKTENNKRTGD-----YMN--KS-----EILNNG          |
| Cyphomyrmex_costatus         | -----DKTENNKR-TGD-----YIN--KS-----EILNNG         |
| Trachymyrmex_septentrionalis | -----DKTENNKR-MGD-----YMN--KS-----EMLNNG         |
| Atta_colombica               | -----DKTENNKR-TGD-----YMN--KS-----EMLNNG         |
| Trachymyrmex_cornetzi        | -----DKTENNKR-TGD-----YMN--KS-----EMLNNG         |
| Acromyrmex_echinator         | -----DKTENNKR-TGD-----YMN--KS-----EMLNNG         |
| Atta_cephalotes              | -----DKTENNKR-TGD-----YMN--KS-----EMLNNG         |

|                               |                       |
|-------------------------------|-----------------------|
| Drosophila_melanogaster       | FIGREA-----           |
| Halyomorpha_halys             | -----                 |
| Rhodnius_prolixus             | -----                 |
| Cimex_lectularius_X1          | -----                 |
| C._lectularius_X2             | -----                 |
| Cryptotermes_secundus         | YILG-----             |
| Miniopterus_natalensis        | RVLTLPSSPS-----       |
| Callithrix_jacchus            | RILALPRSNPS-----      |
| Heterocephalus_glaber_X1      | RILPLPRSSPS-----      |
| Dasyus_novemcinctus           | RILTLPASNPS-----      |
| Tupaia_chinensis_X2           | RILTLPASNPS-----      |
| Homo_sapiens_X1               | RILTLPASNPS-----      |
| Pongo_abelii_2                | RILTLPASNPS-----      |
| Pan_troglodytes_X2            | RILTLPASNPS-----      |
| Boleophthalmus_pectinirostris | RILALPRSTPS-----      |
| Larimichthys_crocea_X2        | RILALPRSSPS-----      |
| Larimichthys_crocea           | RILALPRSSPS-----      |
| Lates_calcarifer              | RILALPRSSPS-----      |
| Seriola_lalandi_dorsalis      | RILALPRSSPS-----      |
| Seriola_dumerili              | RILALPRSSPS-----      |
| Zootermopsis_nevadensis       | YISLPQEDGNECVPLK----- |
| Parasteatoda_tepidarium       | HAYCAKSN-----         |
| Onthophagus_nigriventris      | YVGTNPSNGTRA-----     |
| Nicrophorus_vespilloides      | FVGANK-----           |
| Tribolium_castaneum           | YVSGCPTNGAATTQC-----  |
| Nilaparvata_lugens            | SVNVKTTKC-----        |
| Blattella_germanica           | WVVGNGTGMKTTQC-----   |
| Nasonia_vitripennis_X1        | YIGGPAT-----          |
| Microplitis_demolitor         | YISRTTT-----          |
| Neodiprion_lecontei           | YISGKTTQC-----        |
| Athalia_rosae                 | YISGKTTQC-----        |
| Orussus_abietinus             | YIGGATT-----          |
| Dufourea_novaeangliae         | YIGGTTT-----          |

|                              |                          |
|------------------------------|--------------------------|
| Megachile_rotundata_X1       | YIGGATT-----             |
| Melipona_quadrifasciata      | YIGGTATKQLTLRPCASSYAYTAL |
| Apis_mellifera_X1            | YIGGTTT-----             |
| Eufriesea_mexicana_1         | YIGSTTT-----             |
| Eufriesea_mexicana_2         | YIGSTTT-----             |
| Bombus_terrestris            | YISSTTT-----             |
| Bombus_impatiens             | YISGTTT-----             |
| Polistes_dominula_X1         | YIGGNNKKT-----           |
| Cephus_cinctus_X1            | YIGGAAT-----             |
| Dinoponera_quadriceps_X2     | -----                    |
| Harpegnathos_saltator_X1     | YIGNTTT-----             |
| Linepithema_humile_X2        | -----                    |
| Linepithema_humile_X1        | YIGNTTT-----             |
| Ooceraea_biroi               | YIGNTTT-----             |
| Camponotus_floridanus        | YIGNTAT-----             |
| Solenopsis_invicta           | YIGSTTT-----             |
| Pogonomyrmex_barbatus_X1     | YIGNTAT-----             |
| Vollenhovia_emeryi_X1        | YIGNTAT-----             |
| Wasmannia_auropunctata       | YIGNTTT-----             |
| Cyphomyrmex_costatus         | YISNTTT-----             |
| Trachymyrmex_septentrionalis | YISNTTT-----             |
| Atta_colombica               | YISNTTT-----             |
| Trachymyrmex_cornetzi        | YISNTTT-----             |
| Acromyrmex_echinatior        | YISNTTT-----             |
| Atta_cephalotes              | YISNTTT-----             |



**Supplementary Figure 2. Multiple alignment of insulin receptor sequences.** Rhop-IR predicted aminoacid sequence (RPRC006251-PA) was aligned with 57 sequences of insulin receptors from 54 other species.

Vertebrate (*Larimichthys crocea* XP\_019121818.1 and KKF23242.1, *Boleophthalmus pectinirostris* XP\_020784849.1, *Lates calcarifer* XP\_018533362.1, *Seriola lalandi dorsalis* XP\_023281132.1, *S. dumerili* XP\_022614011.1, *Pongo abelii* PNJ04174.1, *Pan troglodytes* XP\_016790340.1, *Dasyus novemcinctus* XP\_004477219.1, *Miniopterus natalensis* XP\_016072913.1, *H. sapiens* XP\_011526290.2, *Tupaia chinensis* XP\_014440404.1, *Callithrix jacchus* XP\_017823137.1, *Heterocephalus glaber* XP\_004865373.1) and invertebrate (*Cimex lectularius* XP\_014242610.1 and XP\_014242611.1, *Halyomorpha halys* XP\_014273072.1, *Zootermopsis nevadensis* KDR21367.1, *Trachymyrmex septentrionalis* XP\_018338965.1, *Atta colombica* KYM81501.1, *A. cephalotes* XP\_012056411.1, *Trachymyrmex cornetzi* KYN13503.1, *Camponotus floridanus* XP\_011251747.1, *Bombus terrestris* XP\_003393794.1, *B. impatiens* XP\_003490625.1, *Blattella germanica* CDI30232.1, *Cyphomyrmex costatus* KYN02366.1, *Acromyrmex echinator* XP\_011051139.1, *Wasmannia auropunctata* XP\_011696537.1, *Vollenhovia emeryi* XP\_011864734.1, *Ooceraea biroii* XP\_011347281.1, *Cryptotermes secundus* PNF38775.1, *Dinoponera quadricaps* XP\_014476872.1, *Microplitis demolitor* XP\_014295647.1, *Linepithema humile* XP\_012228696.1 and XP\_012228695.1, *Neodiprion lecontei* XP\_015510416.1, *Pogonomyrmex barbatus* XP\_011648404.1, *Eufriesea mexicana* XP\_017754627.1 and XP\_017756280.1, *Orussus abietinus* XP\_023289633.1, *Athalia rosae* XP\_012260906.2, *Harpegnathos saltator* XP\_011144146.1, *Solenopsis invicta* XP\_011158641.1, *Melipona quadrifasciata* KOX70962.1, *Polistes dominula* XP\_015177172.1, *Dufourea novaeangliae* XP\_015431438.1, *Megachile rotundata* XP\_012136521.1, *Nasonia vitripennis* XP\_016838980.1, *Nicrophorus vespilloides* XP\_017772616.1, *Parasteatoda tepidariorum* XP\_015920989.1, *D. melanogaster* AAC47458.1, *O. nigriventris* AFQ20827.1, *Tribolium castaneum* AHF20214.1, *Nilaparvata lugens* AIY24638.1, *Apis mellifera* XP\_016773490.1) sequences were used. The region highlighted in yellow represents the extracellular portion of the receptor comprising the leucine-and cysteine-rich domains. The region highlighted in red indicates the intracellular tyrosine kinase domain, which was used to construct the phylogenetic tree. An asterisk (\*) indicates positions that have a single, fully conserved aminoacid residue, a colon (:) indicates conservation between aminoacid groups of strongly similar properties, and a period (.) indicates conservation between aminoacid groups of weakly similar properties.

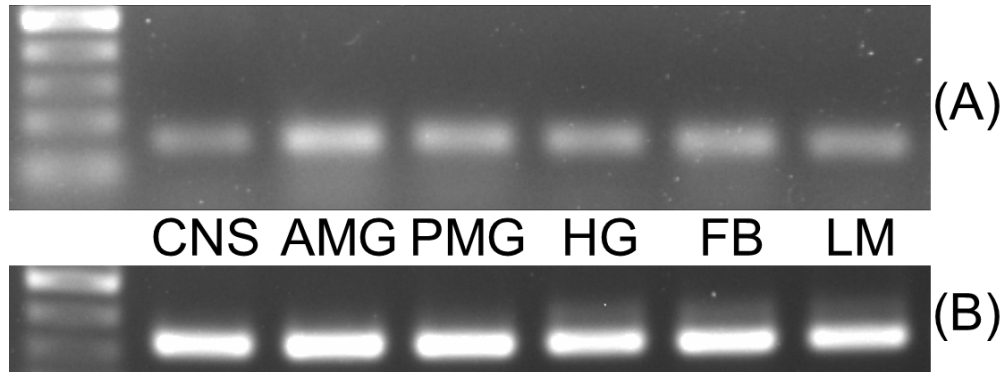

**Supplementary Figure 3. Semi-quantitative analysis of Rhopr-IR transcript expression in 5<sup>th</sup> instars.**

Unfed 5<sup>th</sup> instar *R. prolixus* were dissected and tissues were pooled into 6 different groups (CNS – central nervous system, AMG – anterior midgut, PMG – posterior midgut, HG – hindgut, FB – fat body, LM – leg muscles). (A) indicates Rhopr-IR transcript amplification and (B) indicates actin transcript amplification, which was used as a reference control. The experiment was repeated 3 times.

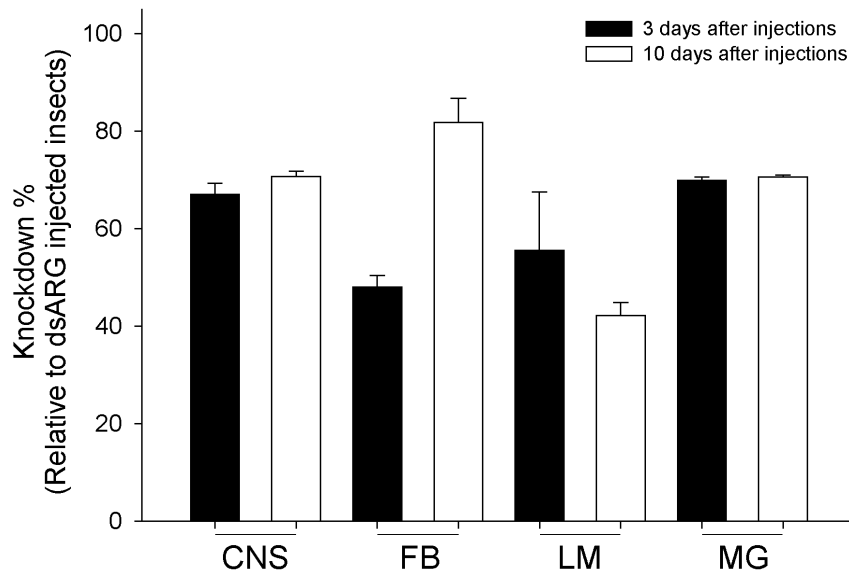

**Supplementary Figure 4. Analysis of Rhopr-IR transcript expression in 5<sup>th</sup> instars post dsRNA injection.**

The double stranded RNAs for Rhopr-IR(dsIR) and Ampicilin Resistance Gene (dsARG) were injected into unfed 5<sup>th</sup> instar *R. prolixus* and insects were dissected at 3 and at 10 days post-injections. Tissues were pooled into 4 different groups (CNS – central nervous system, FB – fat body, LM – leg muscles, MG – midgut) and the expression of Rhopr-IR in dsIR-injected insects was quantified relative to the expression of Rhopr-IR in dsARG-injected insects by using qPCR and the  $\Delta\Delta C_t$  method (Pfaffl, 2001). The experiment was repeated 3 times and results are shown as means + std error.

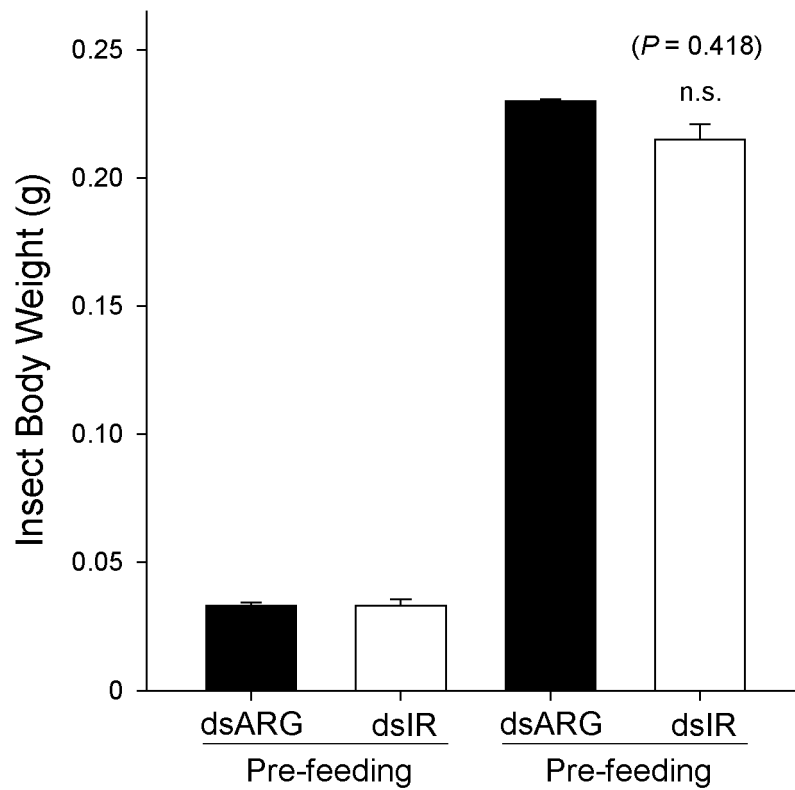

**Supplementary Figure 5. Post-feeding body weight of Rhopr-IR knockdown insects.** 5<sup>th</sup> instar *R. prolixus* were injected with 1 µg of dsARG or dsIR in 1 µL of ultrapure water and fed on defibrinated rabbit blood 3 days after injections. Insects were fed in groups of 40 individuals and allowed to feed for 25 minutes. Results are shown as means + std errors and the experiment was repeated for a total of 3 times. No statistical difference in post-feeding body weight was observed between dsARG- and dsIR-injected insects.

## Supplemental Data – Full Western blots

i. Figure 4, *BpV* vs. Saline – Western blots probing for pTyr (a), actin (b), Akt (c), and pAkt (d)

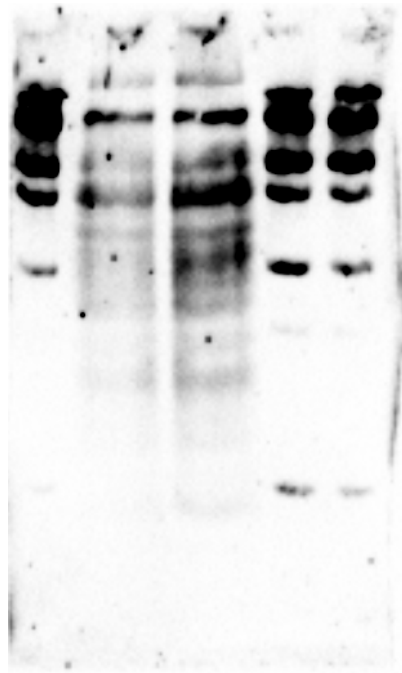

(a) Image displays chemiluminescent detection of anti-pTyr, using an anti-pTyr antibody, for blot shown in Figure 4. Some epitopes of proteins found within the ladders (lanes 1, 4 and 5) were also detected; it is possible that some of the proteins used in these ladders contain pTyr sites (information on proteins contained in protein ladders not disclosed by manufacturer).

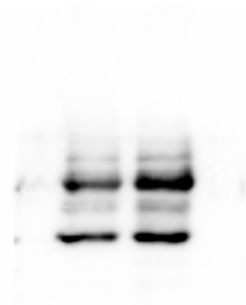

(b) Image displays chemiluminescent detection of anti-actin, using an anti-B-actin primary antibody, for blot shown in Figure 4. Multiple bands observed, potentially as a result of different actin homolog variants within insects, or due to the detection of similar epitopes within different insect proteins. Bottom set of bands used as actin controls in Figure 4, based on MW identification of typical actin protein size in mammals (~42 kDa). Ladder not shown.

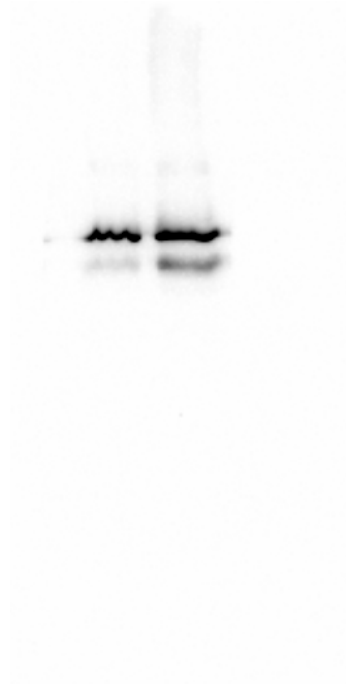

(c) Image displays chemiluminescent detection of anti-Akt, using an anti-Akt primary antibody, for blot shown in Figure 4. Multiple bands observed, potentially as a result of the detection of different Akt homologs that could be present in *R. prolixus*, or due to the detection of similar epitopes within different insect proteins. Top set of bands used as Akt protein signal, based on MW identification of typical Akt protein size in mammals (~60 kDa). Ladder not shown.

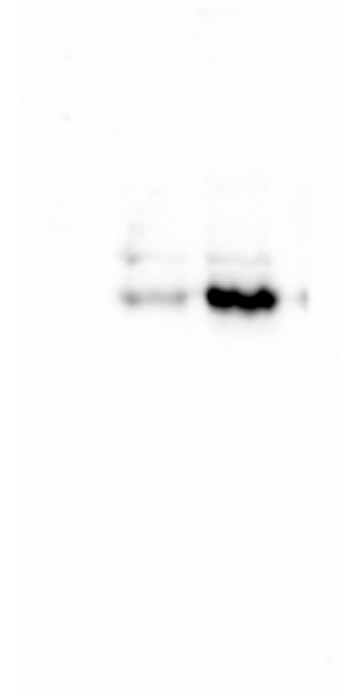

(d) Image displays chemiluminescent detection of anti-pAkt, using an anti-pAkt primary antibody, for blot shown in Figure 4. Multiple bands observed, potentially as a result of the detection of different pAkt homologs that could be present in *R. prolixus*, or due to the detection of similar epitopes within different insect proteins. Bottom set of bands used as pAkt protein signal, based on MW identification of typical pAkt protein size in mammals (~60 kDa). Ladder not shown.

ii. Figure 5A, weeklong feed experiment – pAkt (a), pGSK3B (b), pFOXO (c), and actin (d)

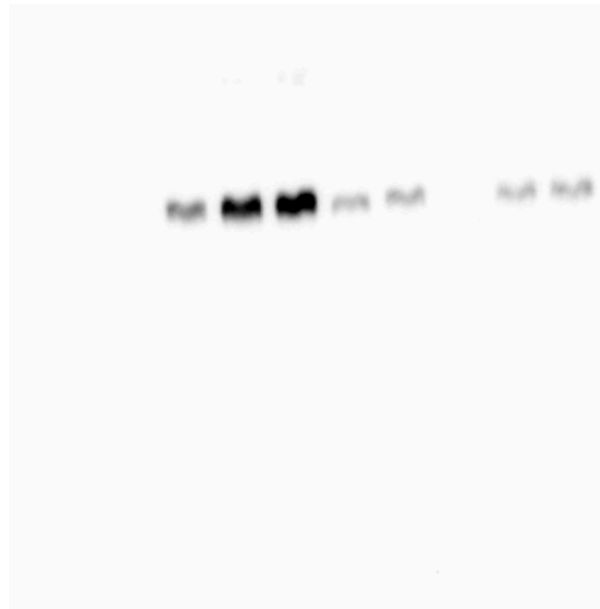

(a) Image displays chemiluminescent detection of anti-pAkt, using an anti-pAkt primary antibody, for blot shown in Figure 5A. Multiple bands observed, potentially as a result of the detection of different pAkt homologs that could be present in *R. prolixus*, or due to the detection of similar epitopes within different insect proteins. Bottom set of bands used as pAkt protein signal, based on MW identification of typical pAkt protein size in mammals (~60 kDa). Last two lanes not shown in Figure 5. Ladder not shown.

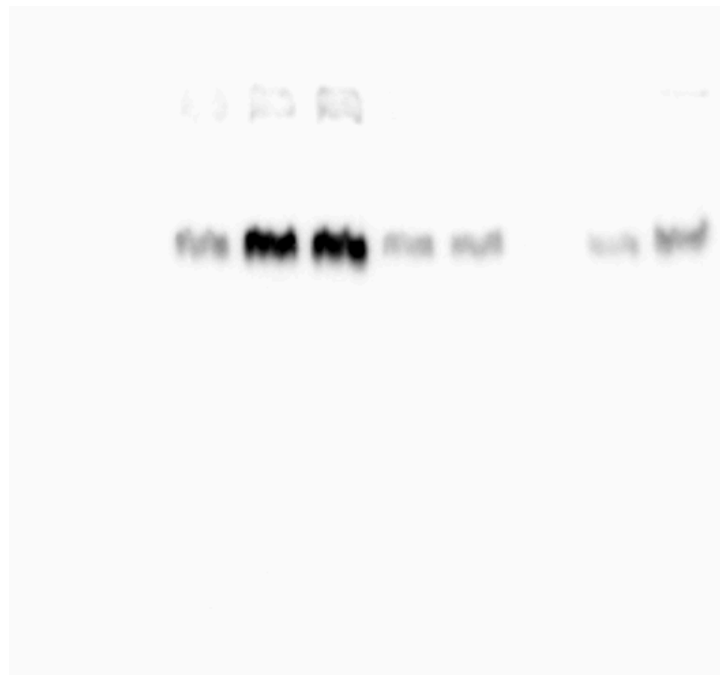

(b) Image displays chemiluminescent detection of anti-pGSK3B, using an anti-pGSK3B primary antibody, for blot shown in Figure 5A. Multiple bands observed, potentially as a result of the detection of different pGSK3B homologs that could be present in *R. prolixus*, or due to the detection of similar epitopes within different insect proteins. Bottom set of bands used as pGSK3B protein signal, based on MW identification of typical pGSK3B protein size in mammals (~46 kDa). Last two lanes not shown in Figure 5. Ladder not shown.

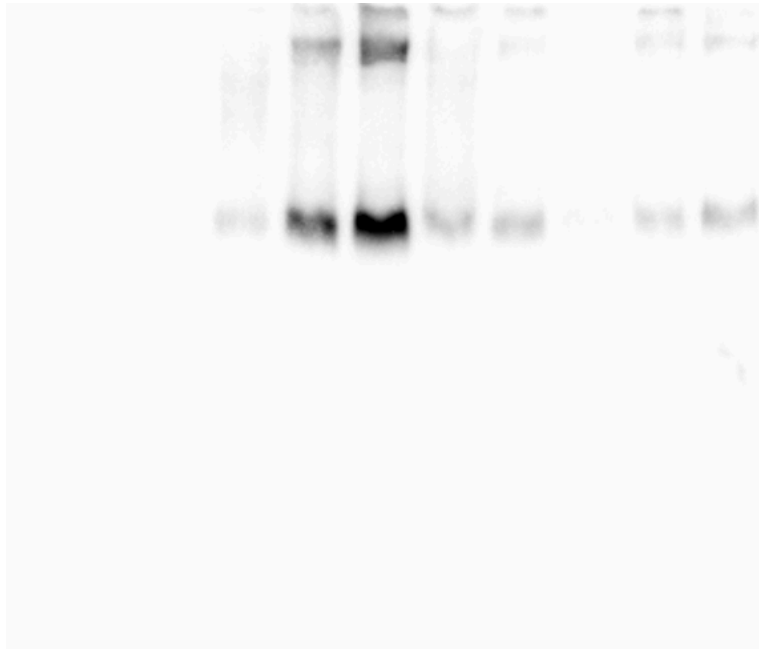

(c) Image displays chemiluminescent detection of anti-pFOXO, using an anti-pFOXO primary antibody, for blot shown in Figure 5A. Multiple bands observed, potentially as a result of the detection of different pFOXO homologs that could be present in *R. prolixus*, or due to the detection of similar epitopes within different insect proteins. Bottom set of bands used as pFOXO protein signal, based on MW identification of typical pFOXO protein size in mammals (~82 kDa). Last two lanes not shown in Figure 5. Ladder not shown.

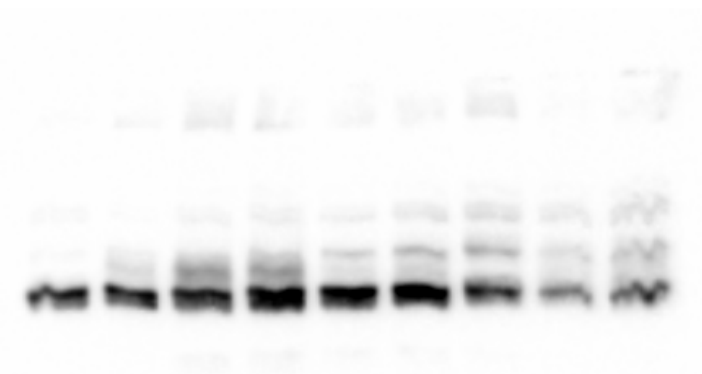

(d) Image displays chemiluminescent detection of anti-actin, using an anti-B-actin primary antibody, for blot shown in Figure 5A. Multiple bands observed, potentially as a result of the detection of different actin homologs that could be present in *R. prolixus*, or due to the detection of similar epitopes within different insect proteins. Bottom set of bands used as actin protein signal and control, based on MW identification of typical actin protein size in mammals (~42 kDa). Last two lanes not shown in Figure 5. Ladder not shown.



iii. Figure 7A, saline vs. porcine insulin – pAkt (a), and Akt (b)

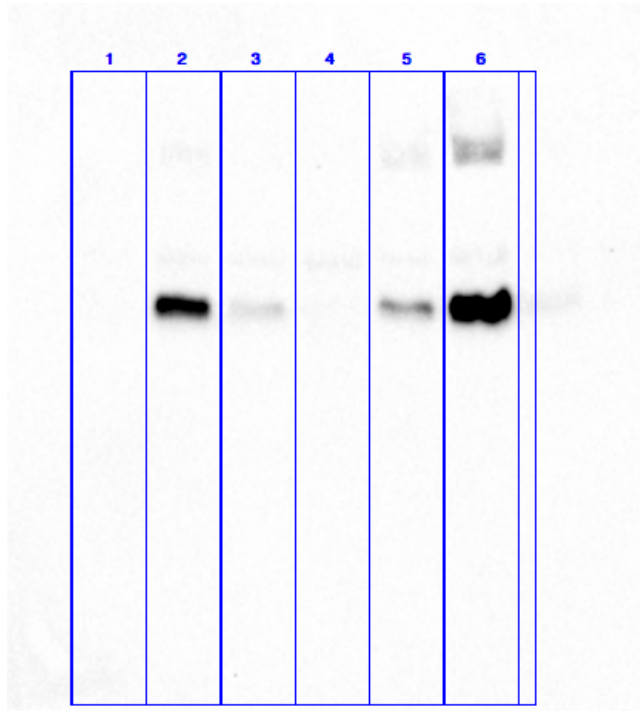

(a) Image displays chemiluminescent detection of anti-pAkt, using an anti-pAkt primary antibody, for blot shown in Figure 7A. Multiple bands observed, potentially as a result of the detection of different pAkt homologs that could be present in *R. prolixus*, or due to the detection of similar epitopes within different insect proteins. Bottom set of bands used as pAkt protein signal, based on MW identification of typical pAkt protein size in mammals (~60 kDa). Lanes correspond to the following conditions, as displayed in Figure 7A: Lane 1 = saline (- glucose); Lane 2 = saline (+ glucose); Lane 5 = porcine insulin (1  $\mu$ g); Lane 6 = porcine insulin (0.1  $\mu$ g). Ladder not shown. Lanes 3 and 4 not shown in Figure 7A.

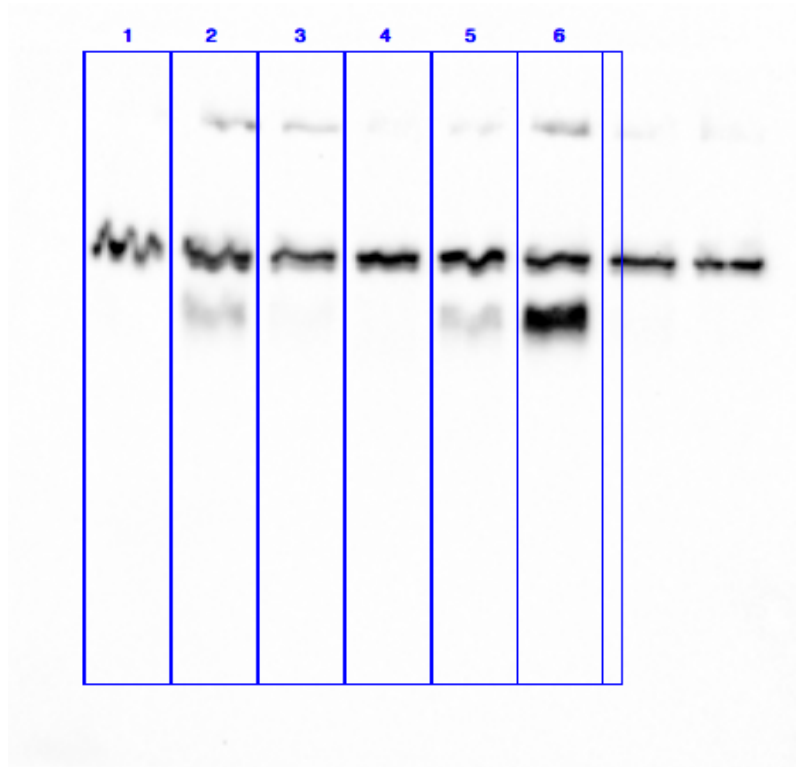

(b) Image displays chemiluminescent detection of anti-Akt, using an anti-Akt primary antibody, for blot shown in Figure 7A. Multiple bands observed, potentially as a result of the detection of different Akt homologs that could be present in *R. prolixus*, or due to the detection of similar epitopes within different insect proteins. Middle set of bands used as Akt protein signal, based on MW identification of typical Akt protein size in mammals (~60 kDa). Identified lanes correspond to the following conditions, as displayed in Figure 7A: Lane 1 = saline (- glucose); Lane 2 = saline (+ glucose); Lane 3 = human insulin (1  $\mu$ g); Lane 4 = human insulin (0.1  $\mu$ g); Lane 5 = porcine insulin (1  $\mu$ g); Lane 6 = porcine insulin (0.1  $\mu$ g). Ladder not shown. Lanes 3, 4, and last 2 lanes not shown in Figure 7A.

iv. Figure 10, dsIR injections – pAkt (a), pGSK3B (b), pFOXO (c), and tubulin (d)

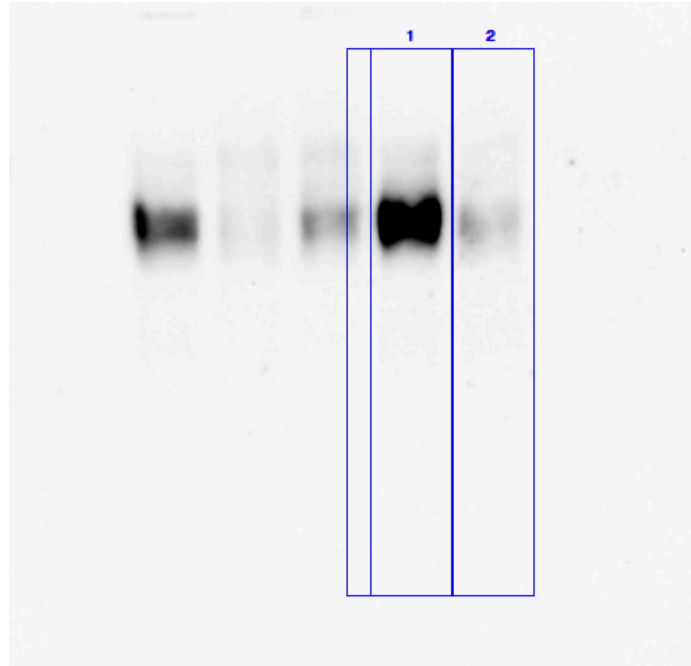

(a) Image displays chemiluminescent detection of anti-pAkt, using an anti-pAkt primary antibody, for blot shown in Figure 10. Multiple bands observed, potentially as a result of the detection of different pAkt homologs that could be present in *R. prolixus*, or due to the detection of similar epitopes within different insect proteins. Samples were obtained solely from fat bodies of unstimulated, starved 5<sup>th</sup> instar *R. prolixus*, unlike other blots shown in Figures 4, 5 and 7, and thus the propensity for detecting background noise is also higher since the signal intensity of pFOXO is inherently weaker without stimulation of the pathway by feeding or pharmacological intervention. Bottom set of bands used as pAkt protein signal, based on MW identification of typical pAkt protein size in mammals (~60 kDa). Identified lanes correspond to the following conditions, as displayed in Figure 10: Lane 1 = dsARG; Lane 2 = dsIR. Ladder not shown. Other lanes not used in Fig. 10.

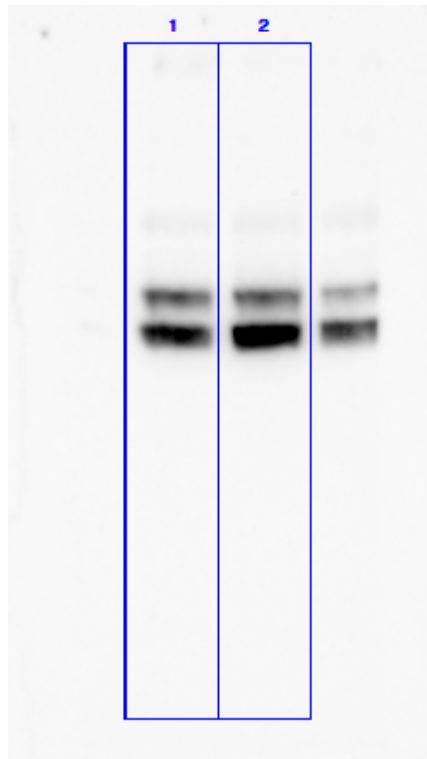

(b) Image displays chemiluminescent detection of anti-pGSK3B, using an anti-pGSK3B primary antibody, for blot shown in Figure 5A. Multiple bands observed, potentially as a result of the detection of different pGSK3B homologs that could be present in *R. prolixus*, or due to the detection of similar epitopes within different insect proteins. Samples were obtained solely from fat bodies of unstimulated, starved 5<sup>th</sup> instar *R. prolixus*, unlike other blots shown in Figures 4, 5 and 7, and thus the propensity for detecting background noise is also higher since the signal intensity of pGSK3B is inherently weaker without stimulation of the pathway by feeding or pharmacological intervention. Bottom set of bands used as pGSK3B protein signal, based on MW identification of typical pGSK3B protein size in mammals (~46 kDa). Identified lanes correspond to the following conditions, as displayed in Figure 10: Lane 1 = dsARG; Lane 2 = dsIR. Ladder not shown. Other lanes not used in Fig. 10.

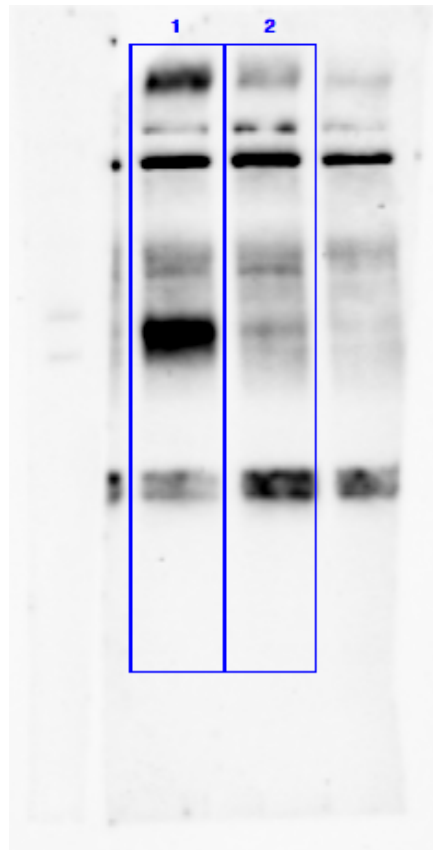

(c) Image displays chemiluminescent detection of anti-pFOXO, using an anti-pFOXO primary antibody, for blot shown in Figure 10. Multiple bands observed, potentially as a result of the detection of different pFOXO homologs that could be present in *R. prolixus*, or due to the detection of similar epitopes within different insect proteins. Samples were obtained solely from fat bodies of unstimulated, starved 5<sup>th</sup> instar *R. prolixus*, unlike other blots shown in Figures 4, 5 and 7, and thus the propensity for detecting background noise is also higher since the signal intensity of pFOXO is inherently weaker without stimulation of the pathway by feeding or pharmacological intervention. Middle set of bands used as pFOXO protein signal, based on MW identification of typical pFOXO protein size in mammals (~82 kDa). Identified lanes correspond to the following conditions, as displayed in Figure 10: Lane 1 = dsARG; Lane 2 = dsIR. Ladder not shown. Other lanes not used in Fig. 10.

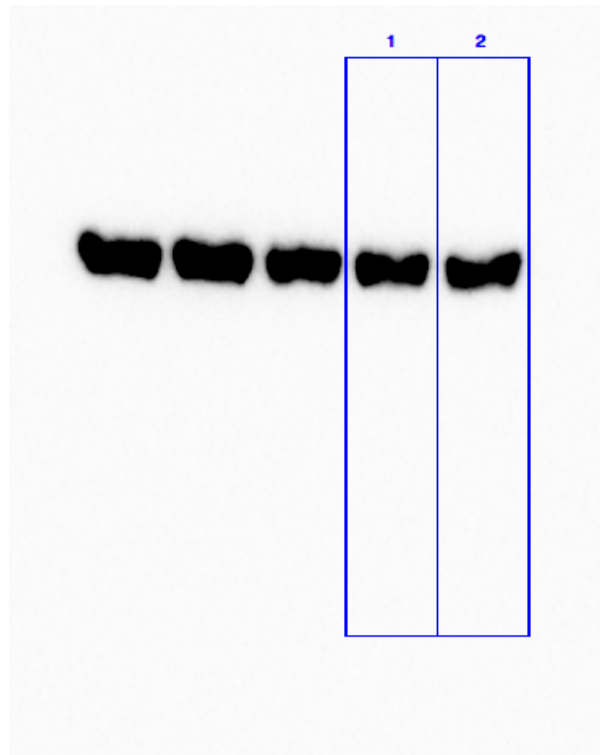

(d) Image displays chemiluminescent detection of anti-tubulin, using an anti- $\alpha$ -tubulin primary antibody, for blot shown in Figure 10. Single set of bands used as tubulin protein signal control, based on MW identification of typical  $\alpha$ -tubulin protein size in mammals ( $\sim 50$  kDa). Identified lanes correspond to the following conditions, as displayed in Figure 10: Lane 1 = dsARG; Lane 2 = dsIR. Ladder not shown. Other lanes not used in Fig. 10.
